# Supplementary material for: Impact of pulse oximetry on hospital referral acceptance in children under 5 with severe pneumonia in rural Pakistan (district Jamshoro): protocol for a cluster randomised trial
Source: PubMed Central journal article supplement (PMC8451312; doi:10.1136/bmjopen-2020-046158), 2021-09-17
Supplement: bmjopen-2020-046158.draft_revisions.pdf [file bmjopen-2020-046158.draft_revisions.pdf]

# BMJ Open

BMJ Open is committed to open peer review. As part of this commitment we make the peer review history of every article we publish publicly available.

When an article is published we post the peer reviewers' comments and the authors' responses online. We also post the versions of the paper that were used during peer review. These are the versions that the peer review comments apply to.

The versions of the paper that follow are the versions that were submitted during the peer review process. They are not the versions of record or the final published versions. They should not be cited or distributed as the published version of this manuscript.

BMJ Open is an open access journal and the full, final, typeset and author-corrected version of record of the manuscript is available on our site with no access controls, subscription charges or pay-per-view fees (<http://bmjopen.bmj.com>).

If you have any questions on BMJ Open's open peer review process please email [info.bmjopen@bmj.com](mailto:info.bmjopen@bmj.com)

# BMJ Open

## Impact of Pulse Oximetry on Hospital Referral Acceptance in Children under 5 with Severe Pneumonia in Rural Pakistan (District Jamshoro): Protocol for a Cluster Randomized Trial

|                               |                                                                                                                                                                                                                                                                                                                                                                                                                                                                                                                                                                                                                                                                                                                                            |
|-------------------------------|--------------------------------------------------------------------------------------------------------------------------------------------------------------------------------------------------------------------------------------------------------------------------------------------------------------------------------------------------------------------------------------------------------------------------------------------------------------------------------------------------------------------------------------------------------------------------------------------------------------------------------------------------------------------------------------------------------------------------------------------|
| Journal:                      | <i>BMJ Open</i>                                                                                                                                                                                                                                                                                                                                                                                                                                                                                                                                                                                                                                                                                                                            |
| Manuscript ID                 | bmjopen-2020-046158                                                                                                                                                                                                                                                                                                                                                                                                                                                                                                                                                                                                                                                                                                                        |
| Article Type:                 | Protocol                                                                                                                                                                                                                                                                                                                                                                                                                                                                                                                                                                                                                                                                                                                                   |
| Date Submitted by the Author: | 22-Oct-2020                                                                                                                                                                                                                                                                                                                                                                                                                                                                                                                                                                                                                                                                                                                                |
| Complete List of Authors:     | Mir, Fatima; Aga Khan University, Pediatrics and Child Health; Aga Khan University, Aga Khan University<br>Ali Nathwani, Apsara; Aga Khan University, chanar, suhail; Aga Khan University, Paediatrics and child health<br>Hussain, Amjad; Aga Khan University, Pediatrics and Child Health<br>Rizvi, Arjumand; Aga Khan Medical University, Pediatrics and Child Health<br>Ahmed, Imran; Aga Khan University<br>Memon, Zahid Ali; Aga Khan University, Centre of Excellence in Women and Child Health<br>Habib, Atif; Aga Khan University, Department of Paediatrics & Child Health<br>soofi, sajid; Aga Khan University Hospital, Paediatric & Child Health<br>Bhutta, Zulfiqar; Aga Khan University, Division of Women and Child Health |
| Keywords:                     | Public health < INFECTIOUS DISEASES, Paediatric infectious disease & immunisation < PAEDIATRICS, PUBLIC HEALTH, RESPIRATORY MEDICINE (see Thoracic Medicine), Clinical trials < THERAPEUTICS                                                                                                                                                                                                                                                                                                                                                                                                                                                                                                                                               |
|                               |                                                                                                                                                                                                                                                                                                                                                                                                                                                                                                                                                                                                                                                                                                                                            |

SCHOLARONE™  
Manuscripts

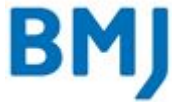

I, the Submitting Author has the right to grant and does grant on behalf of all authors of the Work (as defined in the below author licence), an exclusive licence and/or a non-exclusive licence for contributions from authors who are: i) UK Crown employees; ii) where BMJ has agreed a CC-BY licence shall apply, and/or iii) in accordance with the terms applicable for US Federal Government officers or employees acting as part of their official duties; on a worldwide, perpetual, irrevocable, royalty-free basis to BMJ Publishing Group Ltd ("BMJ") its licensees and where the relevant Journal is co-owned by BMJ to the co-owners of the Journal, to publish the Work in this journal and any other BMJ products and to exploit all rights, as set out in our [licence](#).

The Submitting Author accepts and understands that any supply made under these terms is made by BMJ to the Submitting Author unless you are acting as an employee on behalf of your employer or a postgraduate student of an affiliated institution which is paying any applicable article publishing charge ("APC") for Open Access articles. Where the Submitting Author wishes to make the Work available on an Open Access basis (and intends to pay the relevant APC), the terms of reuse of such Open Access shall be governed by a Creative Commons licence – details of these licences and which [Creative Commons](#) licence will apply to this Work are set out in our licence referred to above.

Other than as permitted in any relevant BMJ Author's Self Archiving Policies, I confirm this Work has not been accepted for publication elsewhere, is not being considered for publication elsewhere and does not duplicate material already published. I confirm all authors consent to publication of this Work and authorise the granting of this licence.

1  
2  
3  
4  
5 **Impact of Pulse Oximetry on Hospital Referral Acceptance in Children under 5 with**  
6 **Severe Pneumonia in Rural Pakistan (District Jamshoro): Protocol for a Cluster**  
7 **Randomized Trial**  
8  
9

10  
11 **Fatima Mir<sup>1\*</sup>, Apsara Ali Nathwani<sup>2</sup>, Suhail Chanar<sup>2</sup>, Amjad Hussain<sup>2</sup>, Arjumand Rizvi<sup>2</sup>,**  
12 **Imran Ahmed<sup>2</sup>, Zahid Memon<sup>2</sup>, Muhammad Atif Habib<sup>2</sup>, Sajid Soofi<sup>1,2</sup>, Zulfiqar A Bhutta<sup>2</sup>**  
13  
14

15  
16 **Affiliations**  
17

18  
19 <sup>1</sup>Department of Pediatrics and Child Health, The Aga Khan University, Pakistan  
20

21 <sup>2</sup>Centre of Excellence in Women & Child Health, The Aga Khan University, Pakistan.  
22  
23  
24  
25  
26  
27  
28  
29

30 **\*Corresponding author**  
31

32 Dr. Fatima Mir  
33

34 Associate Professor  
35

36 Department of Pediatrics and Child Health, the Aga Khan University  
37

38 Stadium Road, Karachi 74800  
39

40 Pakistan  
41

42 Email: [fatima.mir@aku.edu](mailto:fatima.mir@aku.edu)  
43

44 Phone: +92 3005844610  
45

46 **Key words:** Severe pneumonia, hypoxemia, pulse-oximetry, Lady Health Workers (LHWs),  
47 community case management pneumonia, hospital referral.  
48  
49  
50  
51  
52  
53  
54  
55  
56  
57  
58  
59

## Abstract

**Background:** Pneumonia is a leading cause of death among children under five specifically in South Asia and Sub-Saharan Africa. Hypoxemia is a life-threatening complication among children under five with pneumonia. Hypoxemia increases risk of mortality by 4.3 times in children with pneumonia than those without hypoxemia. Prevalence of hypoxemia varies with geography, altitude and severity (9-39% Asia, 3-10% African countries). In this protocol paper we describe research methods for assessing impact of lady health workers identifying hypoxemia in children with signs of pneumonia during household visits on acceptance of hospital referral in District Jamshoro, Sindh.

**Methods and Analysis:** A cluster randomized controlled trial using pulse oximetry as intervention for children with severe pneumonia will be conducted in community settings. Children aged 0-59 months with signs of severe pneumonia will be recruited by Lady Health Workers (LHWs) during routine visits in both intervention and control arms after consent. Severe pneumonia will be defined as fast breathing and/or chest in-drawing, and, one or more danger sign and/or hypoxemia ( $SaO_2 < 92\%$ ) in PO (intervention) group and fast breathing and/or chest in-drawing and 1/more danger sign in clinical signs (control) group. Recruits in both groups will receive a stat dose of oral amoxicillin and referral to designated tertiary health facility. Analysis of variance will be used to compare baseline referral acceptance in both groups with that at end of study.

**Ethics and Dissemination:** Ethical approval was granted by the Ethics Review Committee of the Aga Khan University (4722-Ped-ERC-17), Karachi. Study results will be shared with relevant government and non-governmental organizations, presented at national and international research conferences and published in international peer-reviewed scientific journals.

**Trial registration:** Clinicaltrials.gov Registry NCT03588377. Trial registration Date: May 05, 2018. Last update Date: July 31 2020. Study Status: ongoing

## Article Summary

### Strengths and Limitations of this study

- Our study will directly assess impact of pulse oximetry on family referral acceptance by comparing family acceptance of hospital referral (recommended component of case management for severe pneumonia) in ‘pulse oximetry and clinical signs’ group with ‘clinical signs alone’ group
- The study has applicability because it assesses impact with ‘real-life’ limitations (variability in lady health worker accuracy in identifying severe pneumonia, availability of oxygen and human resource at referral hospital and, availability of private transportation)
- The study design provides means of minimizing the effect of confounding
- The study design avoids bias in allocation to exposure groups
- Blinding is not possible due to nature of intervention
- Some subjects may fail to adhere to protocol and non-adherence may cause an underestimated measure of association.

## Introduction

Pneumonia accounts for an estimated 18% of under-5 mortality across the globe [1] Majority of these pneumonia-specific deaths occur in 15 countries, in which Pakistan ranks fifth. [2] Failure to seek early care and delays in hospital referral are commonly acknowledged determinants of mortality in childhood pneumonia with a higher proportion reported from rural settings than urban. [3-6] Acceptance rates of ‘facilitated’ hospital referral advice have been reported low between 8% and 23% for sick young infants in peri-urban Karachi. [7, 8] They are even lower for non-facilitated referral in rural settings in children under 5 with severe pneumonia in rural Matiari district, Sindh. [5] The prominent reasons in developing countries behind this delay are inability to recognize seriousness of pneumonia, distance from health facility and lack of money for private health care. [9, 10]

In 1994, the Government of Pakistan introduced the Lady Health Worker (LHW) Program in rural populations with low physician density to address common health problems in women and children under 5 through household visits. To date, a team of over 110,000 LHWs are working for the program nationwide with 23,185 LHWs in Sindh alone [11]. Each LHW is responsible for a population of 1000–1500 individuals (catchment of about 100 families). Recruits are preferably local, with a minimum of 8 years of formal schooling followed by 15 months of training to deliver maternal and child health (MCH) care in community settings. During a monthly home visit, the LHW provide essential maternal and child health care services including family planning needs, nutritional assessments of both mother and child, management of minor and common illnesses, improving immunization coverage and imparting health education. [12]

This study recognizes the LHW as a powerful conduit for reaching under 5 children at household level and identifying severe pneumonia in under five at an early stage. It also recognizes the underestimation of hypoxemia ( $SpO_2$  of  $<90\%$ ), a major risk factor for pneumonia mortality at community level and assesses its prevalence. The reported prevalence of hypoxemia in under 5 acutely ill children is 5 to 58% in facilities [13-16] and 16 to 39% in community settings. [17] A 4.3 times higher risk of mortality has been associated with pneumonia with hypoxemia than in children with pneumonia without hypoxemia. [13] Hypoxemia is also predictive of treatment failure with amoxicillin in 3-59 months old children. [18] In resource poor settings where pulse oximetry is not feasible, signs and symptoms of severe pneumonia (sleepiness, cyanosis, head

1  
2  
3 nodding/grunting, and inability to move) are used as predictors of hypoxemia. However, the  
4 validity of clinical signs to predict hypoxemia varies and it is often difficult for physicians  
5 working in settings, where objective detection of hypoxemia is not available, to decide whether  
6 the child coming with severe pneumonia requires administration of oxygen or not. [15, 19, 20]  
7  
8  
9

10 Pulse oximetry [16] is a rapid, portable, non-invasive and accurate method of measuring arterial  
11 hemoglobin oxygenation (SpO<sub>2</sub>) and has therefore been used in trial and clinical settings to  
12 detect hypoxemia. Appropriate oxygen therapy (based on PO findings rather than clinical signs  
13 of severity alone) has been associated with lower mortality risk. [19] Assuming access to  
14 supplemental oxygen, PO could potentially avert up to 148,000 severe pneumonia related deaths  
15 if implemented, and, combining PO with IMCI assessment for pneumonia has been shown to be  
16 cost effective in 15 high burden countries. [21] Emdin et al found first level Lady Health  
17 Workers in peri-urban Karachi could easily perform pulse oximetry on young infants on well and  
18 sick visits to a primary health care facility. [22]  
19  
20  
21  
22  
23  
24  
25

26 Over the past decade, the possible impact of pulse oximetry in hospital and community settings  
27 has been of interest across the globe. Health survey of 54 countries in 2010, suggested that  
28 19.2% of the operating theatres around the globe are not equipped with pulse oximeters [23].  
29 Trials assessing utility of pulse oximetry on a health systems level in Nigeria have shown that  
30 health workers reserve PO for the sickest patients [24, 25]. This has also been observed in areas  
31 at higher altitudes with higher prevalence of hypoxemia (highlands of Papua New Guinea) [25,  
32 26]. There is lack of clarity about how pulse oximetry can be used in the community where  
33 lower hypoxemia prevalence may be a lesser incentive for health workers to use PO such as in  
34 interior Sindh settings in Pakistan. Then again, health workers recruited from within  
35 communities may be better invested and motivated than hospital personnel in following case  
36 management guidelines precluding PO. It is therefore worthwhile to explore and describe  
37 contexts behind a family's acceptance (or not) of referral advice whether based on technology  
38 and/or clinical examination in rural settings where the highest burden of pneumonia deaths lies.  
39  
40  
41  
42  
43  
44  
45  
46  
47  
48

49 Feasibility and sustainability audits of oxygen delivery systems in the Gambia and Egypt have  
50 shown that providing technology alone is ineffective, and should preclude provision of supplies,  
51 education, training and feedback [27-30]. This protocol paper describes a study to assess the  
52  
53  
54  
55  
56  
57  
58  
59  
60



1  
2  
3 effect of PO monitoring in community settings on hospital referral acceptance in children under  
4 5 with severe pneumonia.

## 6 7 **Methods**

### 8 9 **Study aims and design:**

10  
11 The overall aim of the study is to the impact of pulse oximetry on hospital referral acceptance in  
12 children under 5 with severe pneumonia in rural Pakistan, district Jamshoro.

13  
14 Specific objectives are:

- 15  
16 1) To assess and compare the impact of ‘pulse oximetry’ used by LHWs at household level  
17 on increasing hospital referral acceptance rates in intervention clusters (district Jamshoro)  
18 for 0-59 months old children with severe pneumonia with the impact of LHWs using  
19 clinical signs alone in non-intervention clusters of the same district
- 20  
21 2) To determine prevalence of severe pneumonia ± hypoxemia in 0-59-month olds
- 22  
23 3) Investigate the likely predictors (demographic, clinical) of hospital referral acceptance in  
24 both the groups
- 25  
26 4) To compare clinical outcomes (treatment completion, treatment failure, hypoxemia,  
27 duration of hospital) of children 0-59 months admitted with severe pneumonia who  
28 accepted hospital referral to those who refused admission and were treated at home
- 29  
30  
31  
32  
33  
34  
35  
36

37 A cluster randomized study will be conducted within the community in district Jamshoro, among  
38 children of ages 0-59 months (**Figure 1**). Cases will be children with the signs and symptoms of  
39 severe pneumonia. Data will be collected on demographics, likely predictors, and clinical  
40 outcomes using a structured questionnaire.

41  
42 The primary outcome is hospital referral acceptance in children under 5 with severe pneumonia  
43 and to identify demographic and clinical predictors of hospital referral acceptance. The  
44 predictors will include distance of child home to referral facility, socio-economic status of  
45 household, parental education, child age, nutritional status, respiratory rate, temperature,  
46 hypoxemia and presence of other illnesses.

1  
2  
3 Secondary outcomes include duration of oxygen therapy, treatment failure, duration of hospital  
4 stay, vital and health status of child at day 7<sup>th</sup> and 14<sup>th</sup>.  
5  
6

### 7 **Trial setting:**

8  
9 The study will be conducted within the community of Taluka Kotri in District Jamshoro, Sindh  
10 **(Figure 2)**. Jamshoro District has a population of 993,142 [31]. It is predominantly rural, with  
11 33% literacy, and >50% employed daily wage laborers. A baseline survey conducted as a part of  
12 current study showed the status of overall health indicators: skilled birth attendance 57%,  
13 antenatal care coverage 75%, postnatal care cover for mother and newborn within 48 hours  
14 31.5%, vaccination completeness in children 12-23 months 68% and care seeking for ARI and  
15 diarrhea >80% (internal survey). A total of 27 health facilities function in the district including  
16 one District Headquarter (DHQ) Hospital, three Taluka Headquarter (THQ) Hospitals, five Rural  
17 Health Centers (RHCs) and 18 Basic Health Units (BHUs). The district is divided  
18 administratively in 30 union councils. Kotri is one of the 4 Talukas of Jamshoro, consists of 44%  
19 (437,561) of the population of district [31].  
20  
21  
22  
23  
24  
25  
26  
27  
28

29 Participants will be the permanent residents of Kotri, Jamshoro and recruited from their homes  
30 during routine monthly visits by Lady Health Workers serving in their catchment areas. This  
31 study is expected to run for 48 months with participant identification and enrolment conducted  
32 simultaneously in intervention and control clusters over 21 months after an initial pilot of one  
33 month. Each enrolled child will be revisited at day 7 and 14 for outcome measurement.  
34  
35  
36  
37

### 38 **Participant:**

39  
40 Case will be defined as a child aged 0-59 months having signs and symptoms of severe  
41 pneumonia at the time of screening (Appendix 1). Exclusion criteria will be the lack of consent  
42 from a guardian of the child to participate in the study.  
43  
44  
45

### 46 **Randomization and masking:**

47  
48 Study clusters were defined as the area covered by an LHW. Each LHW covers a minimum of  
49 100 households. A list of LHWs working in Kotri was collected from the LHW program, Health  
50 Department Government of Sindh. There are a total of 188 active LHWs in the study site. A  
51 baseline survey was conducted to collect data on health indicators from the LHW catchments.  
52  
53 The clusters were randomly allocated to intervention and control groups on 1:1 fashion with a  
54  
55  
56  
57  
58  
59  
60

1  
2  
3 computer-generated randomization sequence that was generated by an independent expert.  
4 Clusters were matched on under-5 population and distance to referral health facility. No  
5 stratification was used for allocation; clusters were selected to ensure that the reporting and  
6 training centres of intervention and control LHWs were separate. The investigators and the  
7 national and provincial LHW program coordinators will be excluded from the allocation process.  
8  
9

## 12 **Participant Recruitment and Study Procedures:**

### 14 **Intervention delivery**

16 Children aged 0–59 months with cough and/or difficult breathing during regular home visit  
17 (Appendix 2) will be assessed by LHWs for signs and symptoms of severe pneumonia (fast  
18 breathing/chest in-drawing and one or more danger sign (unable to eat/drink, vomiting,  
19 convulsion and lethargy/unconsciousness) and/or Stridor)) and hypoxemia (SpO<sub>2</sub> <92%) using a  
20 handheld pulse oximeter (Masimo Rad-5v) to measure blood oxygen level. LHWs will also do  
21 case management of children with pneumonia and severe pneumonia. A 3-day course of oral  
22 amoxicillin will be given to children with pneumonia at home, whereas children with severe  
23 pneumonia and or hypoxemia (eligible for recruitment) will be requested for informed consent  
24 (**Appendix 3**) and offered stat dose of oral amoxicillin and referral to nearest referral hospital  
25 (DHQ Kotri).  
26  
27  
28  
29  
30  
31  
32  
33

34 The study investigators will have provided these pulse oximeters to the LHW Program in  
35 advance and highlighted which ones will receive them. Physicians at the referral center serving  
36 the intervention clusters will also receive handheld pulse oximeters. All the LHWs and staff will  
37 be trained on the use, and maintenance of these pulse oximeters. Children with severe pneumonia  
38 with or without hypoxemia will be advised to go to hospital for antibiotics and oxygen, using the  
39 PO reading as a tool to convince parents. Name of the pre-designated health facility with  
40 available oxygen and study physician will be provided to all the LHWs so that follow up visits  
41 can be made to ensure the patient receives safe and recommended care at referral facility. Project  
42 staff will pretest and regularly monitor PO accuracy and quality of readings.  
43  
44  
45  
46  
47  
48  
49

50 Hypoxemia will be defined as an arterial oxygen saturation (SpO<sub>2</sub>) <92%. SpO<sub>2</sub> measurement  
51 will be recorded after 1 minute of stable observation. If the SpO<sub>2</sub> comes 92% or less, the child  
52 will first be assessed for nasal obstruction with readings repeated after applying nasal saline  
53 drops. If repeat reading shows hypoxemia, the child will be referred to nearest designated referral  
54  
55  
56  
57

1  
2  
3 hospital and admitted for oxygen via nasal or nasopharyngeal route and intravenous antibiotics,  
4 as per recommendations.  
5

### 6 **Implementation of active control: Clinical Signs assessment**

7  
8  
9 Children aged 0–59 months with cough and/or difficult breathing during regular home visit will  
10 be assessed by LHWs for signs and symptoms of severe pneumonia (fast breathing/chest in-  
11 drawing and one or more danger sign (unable to eat/drink, vomiting, convulsion and  
12 lethargy/unconsciousness) and/or Stridor)). A 3-day course of oral amoxicillin will be given to  
13 children with pneumonia at home, whereas children with severe pneumonia (eligible for  
14 recruitment) will be requested for informed consent (**Appendix 3**) and offered stat dose of oral  
15 amoxicillin and referral to nearest referral hospital.  
16  
17  
18  
19  
20  
21

### 22 **Procedure at referral facility**

23  
24 Children who accept hospital referral in both intervention and control clusters, and reach hospital  
25 premises with LHW referral slip will be assessed by study nurse at the referral center (Appendix  
26 2). An SMS notification with brief details of referred child will have been provided to trained  
27 study personnel (study physician/nurse) in advance at time of referral at both the referral  
28 facilities. Children with severe pneumonia and/or hypoxemia who reach referral hospital  
29 premises will be examined and subjected to pulse oximetry again. They will be admitted for  
30 further appropriate treatment (Oxygen therapy via nasal or nasopharyngeal route and intravenous  
31 antibiotics etc.). All the children at referral facility will also undergo 12 hourly monitoring by  
32 study personnel and filling of case reporting form (CRF) and hospital physician form (HPF) at  
33 day 1, 7 and 14. Those children who refused the referral will be visited by study community  
34 health workers after 24 hours to confirm referral refusal and to fill CRF.  
35  
36  
37  
38  
39  
40  
41  
42

43 Preliminary meetings will be held with the Executive Director Health Jamshoro, Director  
44 General Health Sindh, In-charge Lady Health Worker Program Sindh and In-charge Pediatric  
45 Units LUMHS to ensure their cooperation through study duration. Emergency and pediatric unit  
46 staff at the referral facilities along with study personnel (physician/nurse) will be trained on  
47 management of severe pneumonia according to the integrated management of neonatal and  
48 childhood illnesses (IMNCI) guidelines [32]. A baseline survey will be conducted at the health  
49 facilities to ensure availability of oxygen and necessary intravenous antibiotics. Even though it is  
50 ideal to guarantee sustainable oxygen systems at the two chosen referral public sector hospitals,  
51  
52  
53  
54  
55  
56  
57

1  
2  
3 this study does not provide oxygen and therefore aims to assess ‘real-life’ situations in public  
4 hospitals and their impact on severe pneumonia outcomes with or without hypoxemia. LHWs  
5 will be incentivized on basis of their contribution to the study activities.  
6  
7

### 8 9 **Data Collection and Storage**

10  
11 Data will be collected by LHWs during house visits (Screening form), community health  
12 workers (during follow up visits day 1, 7 and 14) and hospital based study personnel (for all who  
13 accept referral and reach hospital premises) on paper forms (**Appendix 2**). Given that it will be a  
14 new experience for LHWs to assess, classify and manage ARI cases and at the same time record  
15 findings on data forms accurately, these will be supervised closely and frequently, at least for the  
16 first pneumonia season. Well trained study field supervisory officers and LHW supervisors will  
17 be required to perform regular field supervision in their respective clusters and ensure accurate  
18 and logically entered data forms and make necessary verifications and corrections at the data  
19 collection sites and give feedback to the LHW to avoid repeating the errors. Raw data brought to  
20 the program office will be checked once again for accuracy by the technical staff and approved  
21 for entry in the computer. All raw data will be safely kept in the AKU office, appropriately  
22 numbered by cluster, until seven years after the study is over.  
23  
24  
25  
26  
27  
28  
29  
30  
31

### 32 **Case History Records**

33  
34 These include the study case report forms (CRF) and hospital physician form (HPF) that will  
35 contain information that documents the child’s eligibility to participate in the study, the signed  
36 consent form, and information from tests and examinations. Wherever possible copies of  
37 supporting documentation for the information contained in the CRF should be kept with each  
38 patient’s case history record. This supporting documentation may include records of physical  
39 examinations, progress notes, laboratory reports, X-rays, consultations, correspondence,  
40 information and data on the subject’s condition, during and after the clinical investigation,  
41 diagnoses made, concomitant therapy, etc. All information in the case history records should be  
42 attributable to a specific individual. Since the CRF will not contain the patient’s name, there will  
43 be a unique link between the ID number on the CRF and the patient’s name. Each child’s case  
44 history record will be evaluated to verify validity and completeness of the data on the CRF when  
45 a study monitor visits the study site. All corrections to CRF’s must be made without obscuring  
46 the original entry. The revised entry should be inserted and the person making the correction  
47  
48  
49  
50  
51  
52  
53  
54  
55  
56  
57

1  
2  
3 should sign and date the correction. Only authorized study personnel may complete or correct  
4 case report forms.  
5

### 6 7 **Data Management** 8

9 Screening data will be collected on paper by LHWs. Case reporting form (CRF) and Hospital  
10 physician form will be collected on electronic forms. To ensure proper implementation of the  
11 intervention, the field supervisors will make spot checks and will arrange monthly refresher  
12 group sessions of the first-line health workers in which the problems encountered will be  
13 discussed and resolved. In addition, the data collection activity will be carried out by teams  
14 consisting of LHWs/CHWs and study staff will be further monitored by field supervisors who  
15 will perform a check on a subset (5%) of households.  
16  
17

18 An information system will be set up to keep track all patients screened and enrolled and a filing  
19 system to keep all study related records - case history records, study protocol or related  
20 documentation and drug distribution records. The coordinator at the site will be responsible for  
21 the completeness and accuracy of all the study materials.  
22  
23

### 24 25 **Supervision of Data Collection** 26

27 The Project Manager is responsible for oversight of the completion of all appropriate case report  
28 forms up to the time that the child is discontinued from the study. Each completed form will be  
29 submitted monthly and assessed for completeness by the Project Manager. Inconsistencies,  
30 omissions and obvious errors will be compared against the LHW clinical log and corrected.  
31 Study data will be collected on case report forms (CRF). At least once a month, the Project  
32 Manager or his/her designate must contact the designated person to report on the number of new  
33 children enrolled in the study and the status of all enrolled study children. Study specific forms  
34 (paper and electronic versions) will be provided to each site. Each month, the Project Manager  
35 or his/her designate will be responsible for visually editing the CRF for each child who has  
36 completed or withdrawn from the study. All missing data should be identified, and every attempt  
37 should be made to complete missing data.  
38  
39  
40  
41  
42  
43  
44  
45  
46  
47  
48  
49  
50

### 51 52 **Study Protocol and Related Documentation** 53

54 All study related documents including the study protocol, manuals of operations, all  
55 correspondence sent to or received from the study monitor, materials used for obtaining informed  
56  
57

1  
2  
3 consent, protocol modifications and records of the Institutional Review Board approval and all  
4 communications with the IRB must be maintained in complete form. These documents will be  
5 evaluated to ensure that study documentation is complete and current when a study monitor visits  
6 the study site.  
7  
8  
9

### 10 **Record Retention**

11 Retention of accurate and complete records is essential to establish the validity and completeness  
12 of the study. All records must be retained for 7 years after the data set is frozen. Electronic data  
13 will be de-identified, unlinked from any personal identifiers and therefore will protect individual  
14 identity.  
15  
16  
17  
18  
19

### 20 **Reporting of Serious Adverse Events and Treatment Failures**

21 Amoxicillin is in widespread use and is not investigational in any study site. However, since oral  
22 amoxicillin is not routinely recommended for initial treatment of children who have severe  
23 pneumonia, the appropriate case report forms describing the occurrence of a serious adverse  
24 event, treatment failure or death must be faxed to the coordinating center within 72 hours of the  
25 site coordinator knowing about the event. Adverse events, treatment failure and death must be  
26 reported to allow appropriate interpretation of this critical information. If the outcome of the  
27 adverse event is unknown when the site coordinator first notifies the coordinating center, a  
28 follow-up form must be faxed to the coordinating center within 10 days of knowing about the  
29 event. The PI should send a copy of the adverse event data to their local IRB as soon as possible.  
30 The coordinating center will summarize the Adverse Event and Death information and send a  
31 report to the IRB/ERC of sponsors and to site IRBs. Both the rate of adverse events and the rate  
32 of patient accrual at each individual site will be monitored to determine if stopping rules are met.  
33 We do not anticipate serious adverse events. However, in case of one, a DSMB will be requested  
34 for and convened on ad hoc basis for safety review at any time during the study if there is a  
35 concern regarding rates of adverse events or rates of patient accrual. Adverse events will be  
36 reported by the study physician to the principal investigator and clinically managed by the study  
37 physician in conjunction with other physicians at the institution. Any related and unexpected life-  
38 threatening adverse event including death will be reported to the IRB within 2 business days as  
39 per IRB protocol and any related, unexpected and serious adverse event will be reported to the  
40 IRB within 10 business days as per IRB protocol.  
41  
42  
43  
44  
45  
46  
47  
48  
49  
50  
51  
52  
53  
54  
55  
56  
57  
58  
59  
60



## **Compliance with and Deviations from the Study Protocol**

The Site coordinator must agree with and sign the protocol and confirm in writing that he or she has read, understands and will work according to the protocol and Good Clinical Practice. The Site coordinator is responsible for making sure that the protocol is strictly followed and should not make any changes to the study unless necessary to eliminate an apparent immediate hazard or damage to a trial subject. Any deviations from the study protocol including but not limited to inappropriate enrollment of a study subject, administration of the wrong study treatment, missed doses of study treatment, missed observation points, incorrect administration of concomitant medications, etc. should be reported to the coordinating center and each site's IRB. The report should include a plan to rectify any problems at the site that may have caused the protocol deviation.

### **Sample size:**

Defining a cluster as (the catchment area of) one Lady Health Worker (LHW), and assuming a power of 90% in detecting 50% increase in referral acceptance from a 10 % baseline to 15% among 2-59 month old children with severe pneumonia (pneumonia prevalence at 2 week recall (MICS Sindh):7.5% (18% of which is assumed severe Pneumonia) with ICC 0.001736. We need to capture a total of 4160 children with severe pneumonia in both intervention and control groups.

### **Data Analysis:**

The primary analysis for each outcome will perform on an 'intention-to-treat' (ITT) basis, i.e. all children included in the analysis who were enrolled in the study according to the group to which they were allocated. All analyses will account for the cluster-randomized design to ensure correct type I error rates and confidence intervals [33]. Baseline characteristics will be compared by analyzing differences in means and proportions among the study arms. Categorical outcomes will be compared using chi square test and continuous outcomes using Student's t-test. For analysis of predictors of referral acceptance, generalized linear model will be used with logit link function. The univariate analysis will be conducted to explore the independent effect of each predictor on outcome. The variables significant at a liberal p-value of <0.20 will be included in multivariate model for adjustment. The results will be reported as relative risk (RR) with 95%



1  
2  
3 CI. Type 1 error will be set at 5% level. Interim analysis will be conducted after completion of  
4 50% of the data collection. All analysis will be done using STATA version 15.  
5  
6

### 7 **Patient and Public Involvement**

8  
9 Patients or the public will not be involved in the design or conduct of the study. Results will be  
10 disseminated to the community.  
11  
12

### 13 **Study Status**

14  
15 Recruitment began in August 2019 and field activities and data collection are in process. As of  
16 16<sup>th</sup> October 2020, a total of 235 cases and 184 controls have been enrolled. Recruitment is  
17 scheduled to end by December 2021.  
18  
19  
20

### 21 **Discussion**

22  
23 Hypoxemia, a frequent complication of severe pneumonia, is a major risk factor for death in  
24 children under 5. Theoretically, detection of hypoxemia at community level among severe  
25 pneumonia cases by the use of pulse-oximeter would give awareness to the caregivers about  
26 severity of illness and reduce delay in hospital referral. Delayed care-seeking is a recognized risk  
27 factor in pneumonia mortality in community settings [34]. Unfortunately, information on  
28 prevalence of hypoxemia, effectiveness of its detection in influencing parents to seek hospital  
29 care (gold standard for severe pneumonia), and impact of appropriate care at hospital in settings  
30 like Pakistan is lacking. Thus, the findings of this study will build evidence for utility of  
31 providing front-line workers like LHWs with a tool to detect hypoxemia if signs and symptoms  
32 of pneumonia are present. Interestingly various groups across the world are now espousing  
33 pulse-oximetry with other strengths like detection of congenital heart disease [35, 36] and  
34 newborn sepsis [37]. While recognizing the importance of detection of hypoxemia is extremely  
35 important, true impact on pneumonia survival cannot be made without improving oxygen  
36 systems and protocols for use at referral centers. Duke et al showed improved case fatality rates  
37 by providing oxygen concentrators and pulse-oximeters at five hospitals in PNG along with  
38 protocols for use [33].  
39  
40  
41  
42  
43  
44  
45  
46  
47  
48  
49  
50

51 If our study reveals pulse-oximetry has influenced health-seeking behavior significantly, we will  
52 need to follow with a more systematic evaluation of pneumonia care at rural hospitals which  
53 vary in quality of care. We will also need to correlate recovery rates in those who accepted  
54  
55  
56  
57  
58  
59  
60

1  
2  
3 hospital referral versus those who stayed home on oral amoxicillin. Evidence to support home  
4 care for severe pneumonia is poor [38].  
5  
6

### 7 **Ethics and Dissemination**

8  
9 This study has been approved by the Ethical Review Committee of The Aga Khan University  
10 (4722-Ped-ERC-17), Karachi, Pakistan in June 2017. Written informed consent in the local  
11 language will be obtained from parents or guardians of all participants. Data forms will contain  
12 no identifying information other than age, sex and GIS coordinates. Laboratory forms will  
13 contain no identifying information, specimens will be identified by a study number only and test  
14 results will not be linked to any individual by name. All survey staff will sign a confidentiality  
15 agreement to ensure that they do not release participant identities and test or study results to  
16 individuals who are not part of the study team.  
17  
18

19 Study progress and findings will be shared with sponsors (BMGF) quarterly. Results will be  
20 presented at national and international research meetings and conferences and also prepared for  
21 publication in international peer-reviewed scientific journals. Study findings will be  
22 disseminated to the study communities.  
23  
24

### 25 **Declarations:**

26 **Consent for publication:** Yes

27 **Availability of data and materials:** The datasets used for the article and the study is available  
28 from the corresponding author on request.  
29

30 **Competing interests:** The authors declare that they have no competing interests.

31 **Funding:** The study is funded by Bill & Melinda Gates Foundation through Grant OPP1148892.

32 **Author Contributions:** FM, ZM, MAH, SBS & ZAB: conceptualization of project. FM, AAN,  
33 and SC: development of study design and questionnaires. AAN and SC: oversight of data  
34 collection. AAN, SC and AH: support of study logistics and field activities. IA and AR:  
35 statistical analyses. All authors have read and approved the final manuscript.  
36  
37

38 **Acknowledgements:** We would like to acknowledge the mothers and families who have  
39 contributed to the study. We are grateful to the Sindh LHW Program, Department of Health for  
40 their support and facilitation of the trial.  
41  
42  
43  
44  
45  
46  
47  
48  
49  
50  
51  
52  
53  
54  
55  
56  
57  
58  
59  
60

1  
2  
3  
4  
5  
6  
7  
8  
9  
10  
11  
12  
13  
14  
15  
16  
17  
18  
19  
20  
21  
22  
23  
24  
25  
26  
27  
28  
29  
30  
31  
32  
33  
34  
35  
36  
37  
38  
39  
40  
41  
42  
43  
44  
45  
46  
47  
48  
49  
50  
51  
52  
53  
54  
55  
56  
57  
58  
59  
60

For peer review only

## Figures:

Figure 1: *Trial Profile*

Figure 2: *Study intervention and control sites*

## References

1. Liu, L., et al., *Global, regional, and national causes of child mortality: an updated systematic analysis for 2010 with time trends since 2000*. Lancet, 2012. **379**(9832): p. 2151-61.
2. Rudan, I., et al., *Epidemiology and etiology of childhood pneumonia*. Bull World Health Organ, 2008. **86**(5): p. 408-16.
3. *WHO/UNICEF Joint Statement: Management of Pneumonia in community settings*. 2002.
4. *Ending Preventable Child Deaths from Pneumonia and Diarrhoea by 2025: The integrated Global Action Plan for Pneumonia and Diarrhoea (GAPPD)*. 2013, World Health Organization: Geneva, Switzerland.
5. Soofi, S., et al., *Effectiveness of community case management of severe pneumonia with oral amoxicillin in children aged 2-59 months in Matiari district, rural Pakistan: a cluster-randomised controlled trial*. Lancet, 2012. **379**(9817): p. 729-37.
6. Kallander, K., D.H. Burgess, and S.A. Qazi, *Early identification and treatment of pneumonia: a call to action*. Lancet Glob Health, 2015. **4**(1): p. e12-3.
7. Owais, A., et al., *Why do families of sick newborns accept hospital care? A community-based cohort study in Karachi, Pakistan*. J Perinatol, 2011. **31**(9): p. 586-92.
8. Zaidi, A.K., et al., *Community-based treatment of serious bacterial infections in newborns and young infants: a randomized controlled trial assessing three antibiotic regimens*. Pediatr Infect Dis J, 2012. **31**(7): p. 667-72.
9. Ferdous, F., et al., *Mothers' perception and healthcare seeking behavior of pneumonia children in rural bangladesh*. ISRN Family Med, 2014: p. 690315.
10. Waiswa, P., et al., *Using the three delays model to understand why newborn babies die in eastern Uganda*. Trop Med Int Health, 2010. **15**(8): p. 964-72.
11. *LADY HEALTH WORKER PROGRAM FOR FAMILY PLANNING AND PRIMARY HEALTH CARE*. Available from: <https://www.sindhhealth.gov.pk/LHW-Program>.
12. Afsar, H., et al., *Factors affecting unsuccessful referral by the lady health workers in Karachi, Pakistan*. Journal-Pakistan Medical Association, 2003. **53**(11): p. 521-528.
13. Onyango, F.E., et al., *Hypoxaemia in young Kenyan children with acute lower respiratory infection*. BMJ, 1993. **306**(6878): p. 612-5.
14. Smyth, A., H. Carty, and C.A. Hart, *Clinical predictors of hypoxaemia in children with pneumonia*. Ann Trop Paediatr, 1998. **18**(1): p. 31-40.
15. Usen, S., et al., *Clinical predictors of hypoxaemia in Gambian children with acute lower respiratory tract infection: prospective cohort study*. BMJ, 1999. **318**(7176): p. 86-91.
16. McCollum, E.D., et al., *Multicenter study of hypoxemia prevalence and quality of oxygen treatment for hospitalized Malawian children*. Trans R Soc Trop Med Hyg, 2013. **107**(5): p. 285-92.
17. Basnet, S., R.K. Adhikari, and C.K. Gurung, *Hypoxemia in children with pneumonia and its clinical predictors*. Indian J Pediatr, 2006. **73**(9): p. 777-81.
18. Fu, L.Y., et al., *Brief hospitalization and pulse oximetry for predicting amoxicillin treatment failure in children with severe pneumonia*. Pediatrics, 2006. **118**(6): p. e1822-30.
19. Duke, T., et al., *Hypoxaemia in acute respiratory and non-respiratory illnesses in neonates and children in a developing country*. Arch Dis Child, 2002. **86**(2): p. 108-12.
20. Weber, M.W., et al., *Predictors of hypoxaemia in hospital admissions with acute lower respiratory tract infection in a developing country*. Arch Dis Child, 1997. **76**(4): p. 310-4.

21. Floyd, J., et al., *Evaluating the impact of pulse oximetry on childhood pneumonia mortality in resource-poor settings*. *Nature*, 2015. **528**(7580): p. S53-9.
22. Emdin, C.A., et al., *Utility and feasibility of integrating pulse oximetry into the routine assessment of young infants at primary care clinics in Karachi, Pakistan: a cross-sectional study*. *BMC Pediatr*, 2015. **15**: p. 141.
23. Funk, L.M., et al., *Global operating theatre distribution and pulse oximetry supply: an estimation from reported data*. *The Lancet*, 2010. **376**(9746): p. 1055-1061.
24. Ingram, G. and N. Munro, *The use (or otherwise) of pulse oximetry in general practice*. 2005, *British Journal of General Practice*.
25. Mokuolu, O.A. and O.A. Ajayi, *Use of an oxygen concentrator in a Nigerian neonatal unit: economic implications and reliability*. *Ann Trop Paediatr*, 2002. **22**(3): p. 209-12.
26. Matai, S., et al., *Implementing an oxygen programme in hospitals in Papua New Guinea*. *Ann Trop Paediatr*, 2008. **28**(1): p. 71-8.
27. Dobson, M., D. Peel, and N. Khallaf, *Field trial of oxygen concentrators in upper Egypt*. *Lancet*, 1996. **347**(9015): p. 1597-9.
28. Enarson, P., et al., *Implementation of an oxygen concentrator system in district hospital paediatric wards throughout Malawi*. *Bull World Health Organ*, 2008. **86**(5): p. 344-8.
29. Hill, S.E., et al., *Oxygen for treatment of severe pneumonia in The Gambia, West Africa: a situational analysis*. *Int J Tuberc Lung Dis*, 2009. **13**(5): p. 587-93.
30. Howie, S.R., et al., *Meeting oxygen needs in Africa: an options analysis from the Gambia*. *Bull World Health Organ*, 2009. **87**(10): p. 763-71.
31. Pakistan, P.B.o.S.G.o. *PROVINCE WISE PROVISIONAL RESULTS OF CENSUS - 2017*. 2017; Available from: <http://www.pbs.gov.pk/content/block-wise-provisional-summary-results-6th-population-housing-census-2017-january-03-2018>.
32. *Integrated Management of Childhood Illness (IMCI) (revised)*. 2014, Geneva: World Health Organization/The United Nation Children's Fund (UNICEF).
33. Duke, T., et al., *Improved oxygen systems for childhood pneumonia: a multihospital effectiveness study in Papua New Guinea*. *The Lancet*, 2008. **372**(9646): p. 1328-1333.
34. Ferdous, F., et al., *Pneumonia mortality and healthcare utilization in young children in rural Bangladesh: a prospective verbal autopsy study*. *Tropical medicine and health*, 2018. **46**(1): p. 1-10.
35. Engel, M.S. and L.K. Kochilas, *Pulse oximetry screening: a review of diagnosing critical congenital heart disease in newborns*. *Medical Devices (Auckland, NZ)*, 2016. **9**: p. 199.
36. Tekleab, A.M. and Y.C. Sewart, *Role of pulse oximetry in detecting critical congenital heart disease among newborns delivered at a high altitude setting in Ethiopia*. *Pediatric Health, Medicine and Therapeutics*, 2019. **10**: p. 83.
37. Jawin, V., et al., *Beyond critical congenital heart disease: newborn screening using pulse oximetry for neonatal sepsis and respiratory diseases in a middle-income country*. *PLoS One*, 2015. **10**(9): p. e0137580.
38. Das, R.R. and M. Singh, *Treatment of severe community-acquired pneumonia with oral amoxicillin in under-five children in developing country: a systematic review*. *PloS one*, 2013. **8**(6): p. e66232.

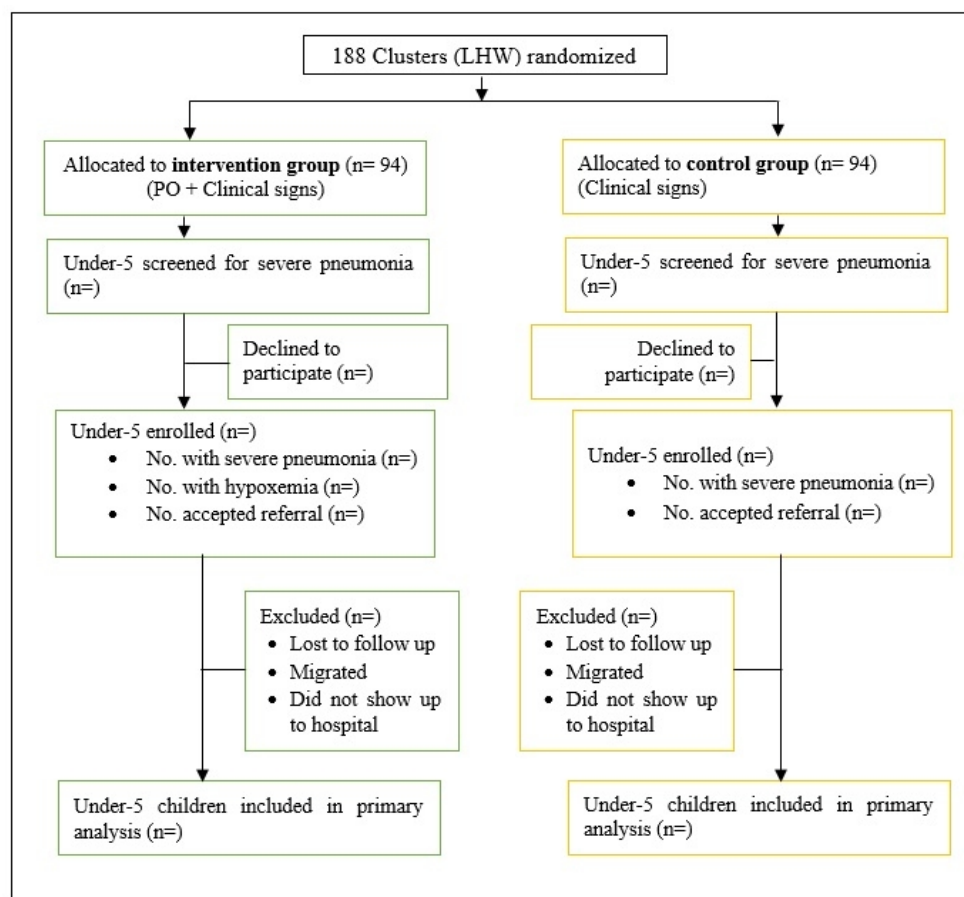

Figure 1: Trial Profile

185x168mm (96 x 96 DPI)

1  
2  
3  
4  
5  
6  
7  
8  
9  
10  
11  
12  
13  
14  
15  
16  
17  
18  
19  
20  
21  
22  
23  
24  
25  
26  
27  
28  
29  
30  
31  
32  
33  
34  
35  
36  
37  
38  
39  
40  
41  
42  
43  
44  
45  
46  
47  
48  
49  
50  
51  
52  
53  
54  
55  
56  
57  
58  
59  
60

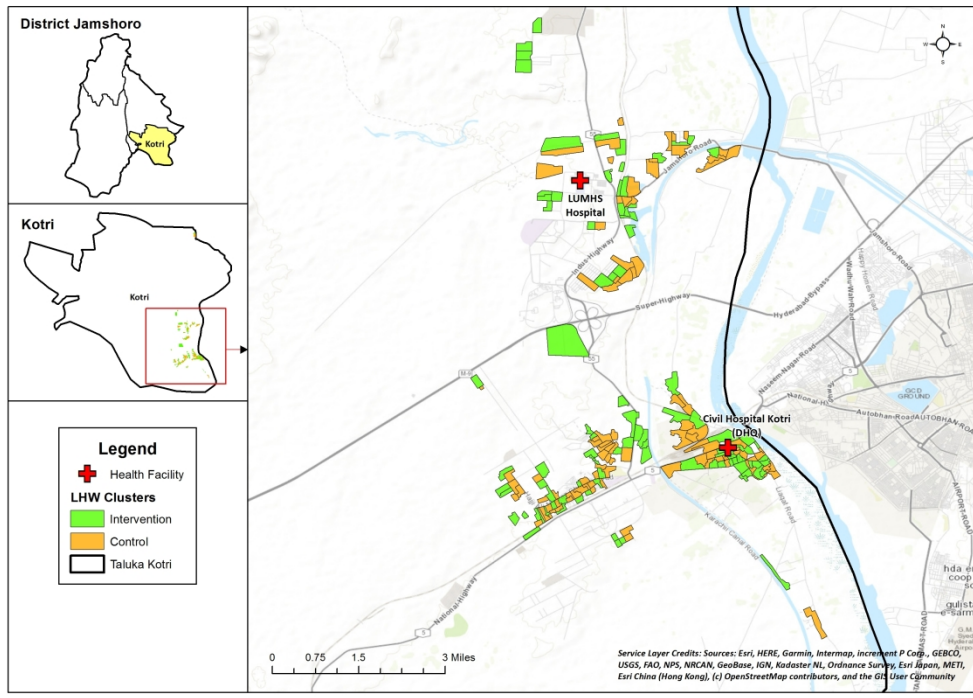

Figure 2: Study Intervention and Control Sites

296x210mm (300 x 300 DPI)



## Appendix 1: Case definition of Severe Pneumonia

| <b>Case Definition of Severe Pneumonia</b>                                                                                                                                                                                                                                                                                                                                                                                                                                                                                                                                                                                                                                                                                                                                                                                                                                                                                                       |                                                                                                                                                                                                                                                                                                                                                                                                                                                                                                                                                                                                                                                                                                                                                      |
|--------------------------------------------------------------------------------------------------------------------------------------------------------------------------------------------------------------------------------------------------------------------------------------------------------------------------------------------------------------------------------------------------------------------------------------------------------------------------------------------------------------------------------------------------------------------------------------------------------------------------------------------------------------------------------------------------------------------------------------------------------------------------------------------------------------------------------------------------------------------------------------------------------------------------------------------------|------------------------------------------------------------------------------------------------------------------------------------------------------------------------------------------------------------------------------------------------------------------------------------------------------------------------------------------------------------------------------------------------------------------------------------------------------------------------------------------------------------------------------------------------------------------------------------------------------------------------------------------------------------------------------------------------------------------------------------------------------|
| <b>Intervention Group</b>                                                                                                                                                                                                                                                                                                                                                                                                                                                                                                                                                                                                                                                                                                                                                                                                                                                                                                                        | <b>Control Group</b>                                                                                                                                                                                                                                                                                                                                                                                                                                                                                                                                                                                                                                                                                                                                 |
| <p><b>Children of 0 – 6 days:</b></p> <ol style="list-style-type: none"> <li>1. Fast Breathing (<math>\geq 60</math> breaths/min)<br/>+/-</li> <li>2. <i>Hypoxemia</i> (<math>&lt;92</math> SpO<sub>2</sub> Blood Oxygen Level)</li> </ol> <p><b>Children of 7 days – 59 months:</b></p> <ol style="list-style-type: none"> <li>1. Fast Breathing and/or Chest In-drawing               <ul style="list-style-type: none"> <li>➤ 0-2months: <math>\geq 60</math> breaths/min</li> <li>➤ 2-12months: <math>\geq 50</math> breaths/min</li> <li>➤ 12-59months <math>\geq 40</math> breaths/min</li> </ul> </li> <li>2. Any ONE General Danger Sign* and/or Stridor               <ul style="list-style-type: none"> <li>➤ *Unable to drink/eat</li> <li>➤ Vomiting</li> <li>➤ Convulsions</li> <li>➤ Lethargy/Unconsciousness</li> </ul> </li> <li>3. <i>Hypoxemia</i> (<math>&lt;92</math> SpO<sub>2</sub> Blood Oxygen Level)<br/>+/-</li> </ol> | <p><b>Children of 0 – 6 days:</b></p> <ol style="list-style-type: none"> <li>1. Fast Breathing (<math>\geq 60</math> breaths/min)</li> </ol> <p><b>Children of 7 days – 59 months:</b></p> <ol style="list-style-type: none"> <li>1. Fast Breathing and/or Chest In-drawing               <ul style="list-style-type: none"> <li>➤ 0-2months: <math>&gt; 60</math> breaths/min</li> <li>➤ 2-12months: <math>\geq 50</math> breaths/min</li> <li>➤ 12-59months <math>\geq 40</math> breaths/min</li> </ul> </li> <li>2. Any ONE General Danger Sign* and/or Stridor               <ul style="list-style-type: none"> <li>➤ *Unable to drink/eat</li> <li>➤ Vomiting</li> <li>➤ Convulsions</li> <li>➤ Lethargy/Unconsciousness</li> </ul> </li> </ol> |



Appendix 2: Study Activities

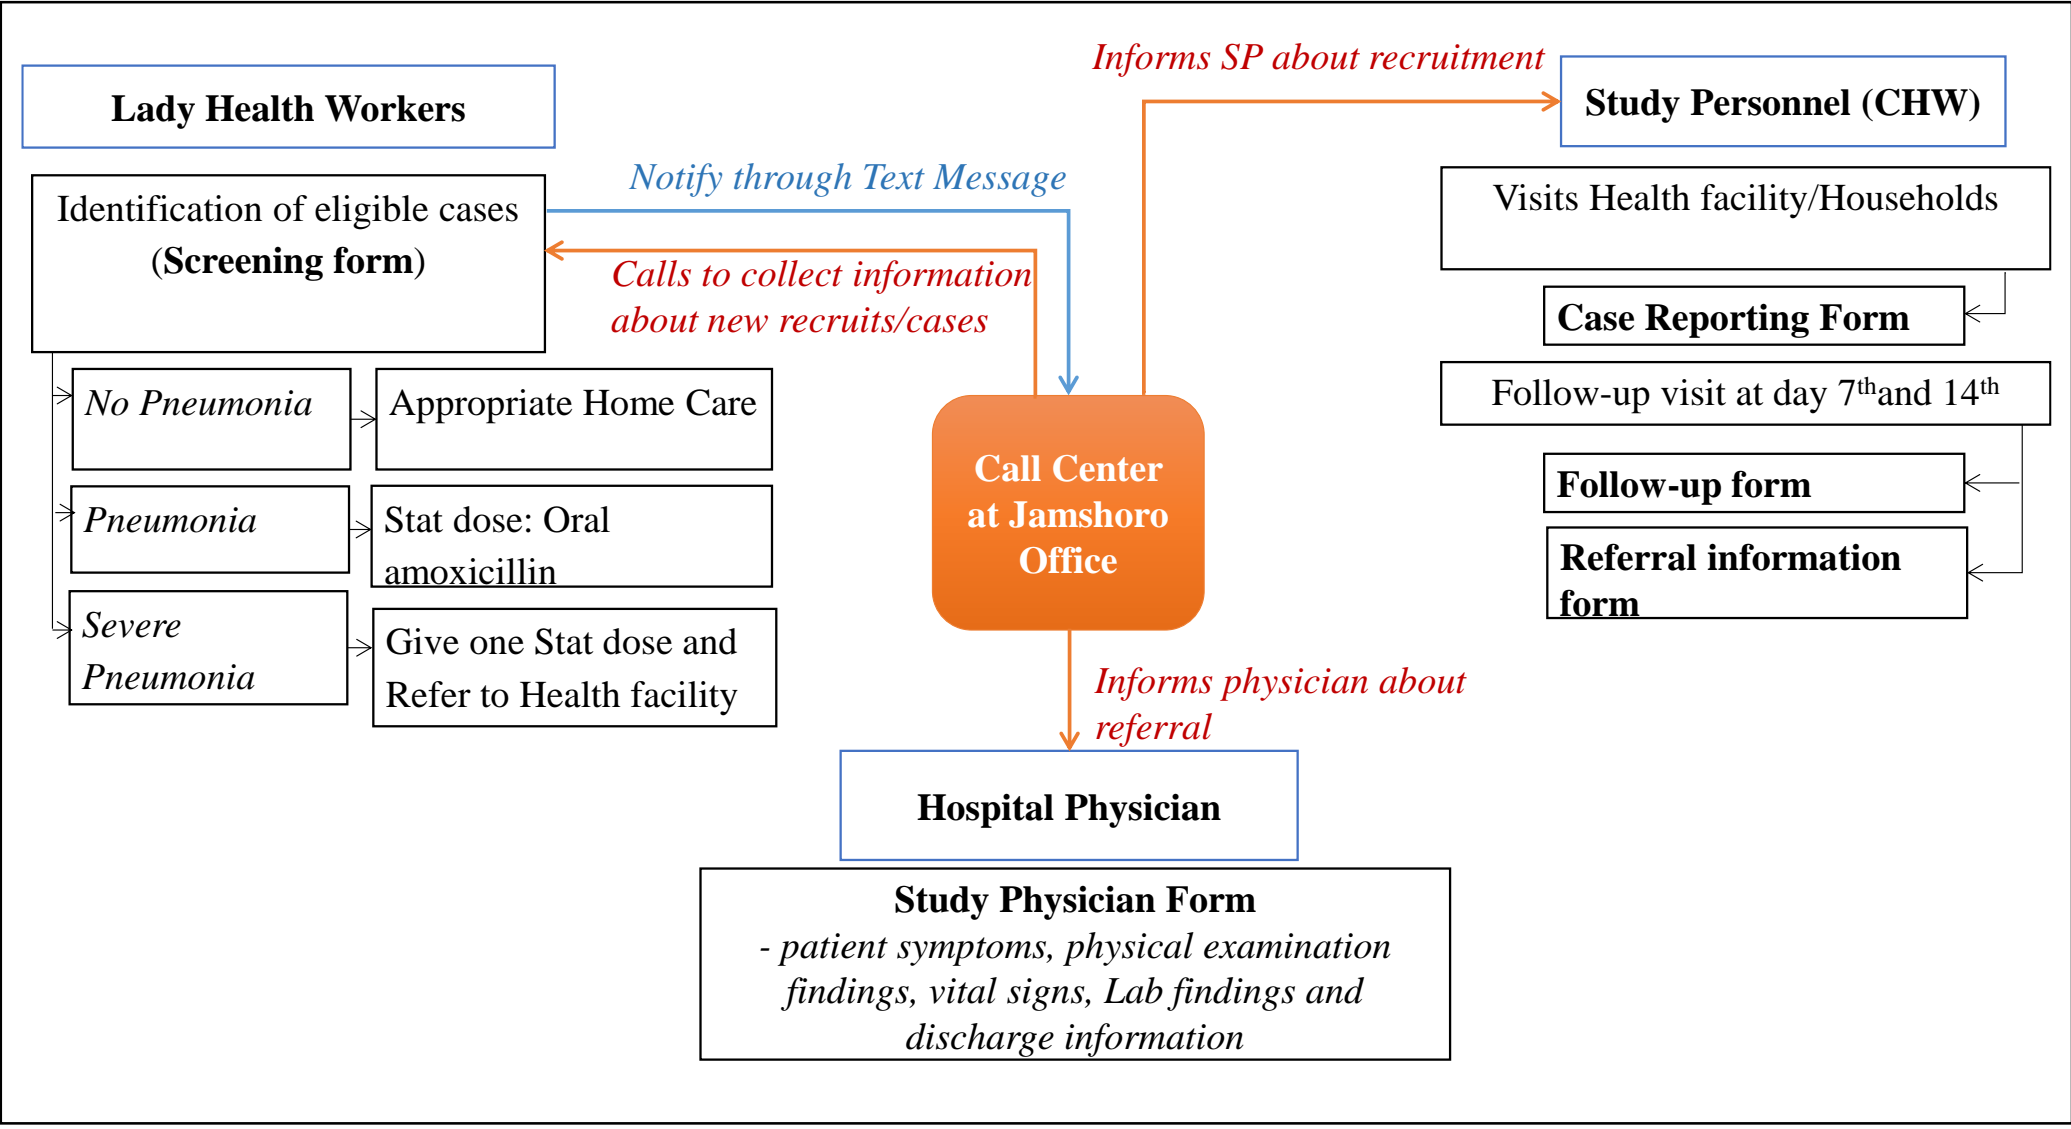

1  
2  
3 *Appendix 3: Informed Consent*  
4  
5

6 **Research Consent Form**  
7

8  
9 **Title of Research Project:**

10  
11 **Impact of Pulse Oximetry on Hospital Referral Acceptance in children under 5 with severe pneumonia in**  
12 **rural Pakistan (District Jamshoro): a cluster randomized trial (GAPPD Scale up Project)**  
13  
14

15  
16  
17 **Investigators:**

18 Dr. Fatima Mir (Principal investigator PO Project, AKU)

19 Department of Pediatrics and Child Health, Aga Khan University, Karachi, Pakistan

20 Tel: 92-21-34864955  
21  
22

23  
24  
25 Dr. Sajid Soofi (PI, Scale up of GAPPD in Pakistan)

26 Centre of Excellence in Women & Child Health, The Aga Khan University, Pakistan.

27 Tel: 92-21-34864955  
28  
29

30  
31  
32 Professor Zulfiqar Bhutta (Senior Investigator, Scale up of GAPPD in Pakistan)

33 Centre of Excellence in Women & Child Health, The Aga Khan University, Pakistan.

34 Tel: 92-21-34864955  
35  
36

37  
38  
39 **Purpose of the Research:**  
40

41  
42  
43 Severe Pneumonia is a serious and possibly life threatening infection in young children aged under 5 years. It  
44 may involve fast breathing, chest indrawing, and danger signs like inability to feed, convulsions, persistent  
45 vomiting and decreased movement. Hypoxemia is now recognized as an additional sign of severe pneumonia  
46 needing hospital admission. Pulse oximetry (the 'oxygen test') is a simple method whereby lady health  
47 workers can check level of oxygen in blood of children and decide which young babies need immediate  
48 medical care and referral to hospital for antibiotics and oxygen and which babies can be treated in the health  
49 center itself.  
50

51  
52 In this study, we are testing whether use of pulse oximetry in addition to other danger signs of severe  
53 pneumonia will influence families to accept hospital referral in comparison to areas where danger signs other  
54 than hypoxemia are used.  
55

56 This project is a collaboration between Aga Khan University (AKU) in Karachi and the Gates Foundation,  
57 Seattle, USA.  
58  
59  
60

### **Description of the Research:**

We are inviting children aged 0 to 59 months screened at home to join this research study. If your baby joins the study, the following activities will take place:

- 1) **Questionnaire.** We will ask several questions about the health of your baby, as well as check him/her for presence of pneumonia. If he/she has signs of severe pneumonia (with or without hypoxemia), he will be eligible to take part in our study.
- 2) **Pulse oximetry.** Next your child may or may not undergo a pulse oximetry measurement dependent on whether he resides in an intervention or non-intervention cluster. The process will be painless for the child and will involve placing a sensor on your baby's foot or hand. Each sensor is attached to a pulse oximetry machine. A number on the screen of the machine shows the oxygen level. A level including and above 92% will be regarded as normal.

All babies with fast breathing or chest in drawing pneumonia AND any one of general danger signs (inability to feed, persistent vomiting, decreased movement, convulsions) with or without hypoxemia (SaO<sub>2</sub> <92%) will be advised and helped to go to an assigned hospital for treatment (antibiotics and possibly oxygen supportive therapy). Their clinical status over there will be followed and transfer to hospital and subsequent treatment will be facilitated by the study.

All responses will be documented on paper forms. We will arrange for quick referral to hospital if your baby has low oxygen level or other signs of serious illness. Follow-up visits by our study staff will be conducted to check the status of your baby.

- 3) You may be asked detailed questions based on whether you accept or refuse hospital referral to allow us to understand what factors contributed to your decision making. Since this process will take time, we will do it after the child's treatment plan has been started at hospital or at home.
- 4) **Video recording.** Some infants will be video recorded during the study. The researchers will look at these videos to make quality checks on study conduct and procedures. You can refuse video recording but still join the rest of the study. If you provide permission, some videos may be shown publicly for education purposes, but your child's name will be kept private. The videos or images from them will not be shown or sold for financial profit.
- 5) **Stored information.** This study is connected to other studies coordinated by the Aga Khan University. If you agree to join this study, we will access information about your baby collected as part of the Aga Khan University demographic surveillance system and other Aga Khan University studies to which you have already allowed, or will allow, your baby to join.

We expect to enroll about 4160 children with severe pneumonia in this study.

### **Potential Harms, Discomforts or Inconveniences:**

There are no harms or discomforts that could be caused to your baby by taking part in this study.

### **Potential Benefits to individual participants:**

Your baby may benefit by joining this study as we will provide facilitated transfer to hospital and free treatment at the hospital if referral is accepted. If you refuse to accept hospital referral for injectable antibiotics and oxygen, we will provide less ideal oral treatment options at home.

### **Potential Benefits to Society:**

We may learn more about the usefulness of pulse oximetry for assessment of young babies in your community and other similar places.

**Confidentiality:**

We will respect your privacy. No information about you or your child will be given to anyone or be published without your permission, unless required by law. The paper forms, videos and electronic information made in this study will be stored in a secure, locked location. Only members of the research team will have access to them. BMGF (the sponsor) or AKU Clinical Research Monitors may look at your child's records to check on the study. By signing this consent form, you agree to let these people look at your child's records. We will put a copy of this research consent form in your child's patient health record and give you a copy as well. After the study has been completed, the forms and videos will be kept as long as required by BMGF and AKU policies. They will then be destroyed according to these same policies. Paper and electronic forms from this study will be stored for at least 7 years after publication of the study. Published study results will not reveal your identity or the identity of your baby.

**Payment**

No payment will be given for participation in this study. However, if your baby requires referral to hospital, we will pay for the transportation and medical care at the hospital.

**Participation:**

You decide if your child joins this study. If you choose to let your child take part, you can take your child out of the study at any time.

In the unlikely situation that your child becomes ill or is harmed because of study participation, we will treat your child for free. Your signing this consent form does not interfere with your legal rights in any way. The staff of the study, any people who gave money for the study, or the hospital are still responsible, legally and professionally, for what they do during this study.

**Sponsorship:**

The funder of this research is the Bill and Melinda Gates Foundation Seattle, USA.

**Conflicts of interest:**

None of the researchers have any conflicts of interest to declare.

**Consent:**

By signing this form, you agree that:

- 1) The study has been explained to you.
- 2) All of your questions have been answered.
- 3) The possible harms and benefits of this study have been explained to you.
- 4) You may ask questions about the study now and in the future.
- 5) You have been told that your child's medical records will be kept private except as described to you.
- 6) You understand that information about your child will not be given to anyone or be published without first asking your permission.

I agree that my child \_\_\_\_\_ may take part in this study.

I understand that videos may be used to assess the success of pulse oximetry. I understand that I may refuse to permit video-recording of my child, yet take part in other aspects of the study. I understand that even if I permit video-recording now, I may refuse the use of these videos at a later time. I understand that I may permit video-recording of my child for researchers to view, but refuse any public display of the videos.

I agree to permit my child and me to be video-recorded during this study.

YES  NO

I agree to permit whole or parts of videos of my child and me to be shown publicly for educational purposes.

YES  NO

\_\_\_\_\_  
Printed Name of Parent/Legal Guardian  
date

\_\_\_\_\_  
Parent/Legal Guardian's signature/Thumb print &

\_\_\_\_\_  
Printed Name of person who explained consent

\_\_\_\_\_  
Signature of Person who explained consent & date

\_\_\_\_\_  
Printed Witness' name

\_\_\_\_\_  
Witness' signature & date

(If the parent/legal guardian does not read Sindhi)

If you have any questions about this study, please call Dr Fatima Mir at \_\_\_\_\_

If you have questions about your child's rights as a subject in a study or injuries during a study, please call  
Coordinator, Bioethics Unit at \_\_\_\_\_

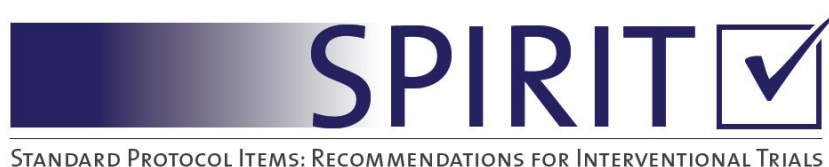

SPIRIT 2013 Checklist: Recommended items to address in a clinical trial protocol and related documents\*

| Section/item                      | Item No | Description                                                                                                                                                                                                                                                                              | Page numbers:          |
|-----------------------------------|---------|------------------------------------------------------------------------------------------------------------------------------------------------------------------------------------------------------------------------------------------------------------------------------------------|------------------------|
| <b>Administrative information</b> |         |                                                                                                                                                                                                                                                                                          |                        |
| Title                             | 1       | Descriptive title identifying the study design, population, interventions, and, if applicable, trial acronym                                                                                                                                                                             | Title page             |
| Trial registration                | 2a      | Trial identifier and registry name. If not yet registered, name of intended registry                                                                                                                                                                                                     | Page 1                 |
|                                   | 2b      | All items from the World Health Organization Trial Registration Data Set                                                                                                                                                                                                                 | Page 1                 |
| Protocol version                  | 3       | Date and version identifier                                                                                                                                                                                                                                                              |                        |
| Funding                           | 4       | Sources and types of financial, material, and other support                                                                                                                                                                                                                              | Page 14                |
| Roles and responsibilities        | 5a      | Names, affiliations, and roles of protocol contributors                                                                                                                                                                                                                                  | Title page and page 14 |
|                                   | 5b      | Name and contact information for the trial sponsor                                                                                                                                                                                                                                       |                        |
|                                   | 5c      | Role of study sponsor and funders, if any, in study design; collection, management, analysis, and interpretation of data; writing of the report; and the decision to submit the report for publication, including whether they will have ultimate authority over any of these activities |                        |
|                                   | 5d      | Composition, roles, and responsibilities of the coordinating centre, steering committee, endpoint adjudication committee, data management team, and other individuals or groups overseeing the trial, if applicable (see Item 21a for data monitoring committee)                         |                        |

**Introduction**

|    |                                                           |     |                                                        |                |
|----|-----------------------------------------------------------|-----|--------------------------------------------------------|----------------|
| 1  |                                                           |     |                                                        |                |
| 2  | Background and                                            | 6a  | Description of research question and justification     | Pages 3 - 5    |
| 3  | rationale                                                 |     | for undertaking the trial, including summary of        |                |
| 4  |                                                           |     | relevant studies (published and unpublished)           |                |
| 5  |                                                           |     | examining benefits and harms for each                  |                |
| 6  |                                                           |     | intervention                                           |                |
| 7  |                                                           |     |                                                        |                |
| 8  |                                                           | 6b  | Explanation for choice of comparators                  | Page 4         |
| 9  |                                                           |     |                                                        |                |
| 10 | Objectives                                                | 7   | Specific objectives or hypotheses                      | Page 5         |
| 11 |                                                           |     |                                                        |                |
| 12 | Trial design                                              | 8   | Description of trial design including type of trial    | Page 5         |
| 13 |                                                           |     | (eg, parallel group, crossover, factorial, single      |                |
| 14 |                                                           |     | group), allocation ratio, and framework (eg,           |                |
| 15 |                                                           |     | superiority, equivalence, noninferiority,              |                |
| 16 |                                                           |     | exploratory)                                           |                |
| 17 |                                                           |     |                                                        |                |
| 18 |                                                           |     |                                                        |                |
| 19 |                                                           |     |                                                        |                |
| 20 | <b>Methods: Participants, interventions, and outcomes</b> |     |                                                        |                |
| 21 |                                                           |     |                                                        |                |
| 22 | Study setting                                             | 9   | Description of study settings (eg, community           | Page 6         |
| 23 |                                                           |     | clinic, academic hospital) and list of countries       |                |
| 24 |                                                           |     | where data will be collected. Reference to where       |                |
| 25 |                                                           |     | list of study sites can be obtained                    |                |
| 26 |                                                           |     |                                                        |                |
| 27 | Eligibility criteria                                      | 10  | Inclusion and exclusion criteria for participants. If  | Page 6         |
| 28 |                                                           |     | applicable, eligibility criteria for study centres and |                |
| 29 |                                                           |     | individuals who will perform the interventions (eg,    |                |
| 30 |                                                           |     | surgeons, psychotherapists)                            |                |
| 31 |                                                           |     |                                                        |                |
| 32 |                                                           |     |                                                        |                |
| 33 | Interventions                                             | 11a | Interventions for each group with sufficient detail    | Pages 7 - 9    |
| 34 |                                                           |     | to allow replication, including how and when they      |                |
| 35 |                                                           |     | will be administered                                   |                |
| 36 |                                                           |     |                                                        |                |
| 37 |                                                           | 11b | Criteria for discontinuing or modifying allocated      | Not applicable |
| 38 |                                                           |     | interventions for a given trial participant (eg, drug  |                |
| 39 |                                                           |     | dose change in response to harms, participant          |                |
| 40 |                                                           |     | request, or improving/worsening disease)               |                |
| 41 |                                                           |     |                                                        |                |
| 42 |                                                           |     |                                                        |                |
| 43 |                                                           | 11c | Strategies to improve adherence to intervention        | Not applicable |
| 44 |                                                           |     | protocols, and any procedures for monitoring           |                |
| 45 |                                                           |     | adherence (eg, drug tablet return, laboratory          |                |
| 46 |                                                           |     | tests)                                                 |                |
| 47 |                                                           |     |                                                        |                |
| 48 |                                                           |     |                                                        |                |
| 49 |                                                           | 11d | Relevant concomitant care and interventions that       |                |
| 50 |                                                           |     | are permitted or prohibited during the trial           |                |
| 51 |                                                           |     |                                                        |                |
| 52 |                                                           |     |                                                        |                |
| 53 |                                                           |     |                                                        |                |
| 54 |                                                           |     |                                                        |                |
| 55 |                                                           |     |                                                        |                |
| 56 |                                                           |     |                                                        |                |
| 57 |                                                           |     |                                                        |                |
| 58 |                                                           |     |                                                        |                |
| 59 |                                                           |     |                                                        |                |
| 60 |                                                           |     |                                                        |                |

|    |                      |    |                                                                                                                                                                                                                                                                                                                                                                                |             |
|----|----------------------|----|--------------------------------------------------------------------------------------------------------------------------------------------------------------------------------------------------------------------------------------------------------------------------------------------------------------------------------------------------------------------------------|-------------|
| 1  |                      |    |                                                                                                                                                                                                                                                                                                                                                                                |             |
| 2  | Outcomes             | 12 | Primary, secondary, and other outcomes, including the specific measurement variable (eg, systolic blood pressure), analysis metric (eg, change from baseline, final value, time to event), method of aggregation (eg, median, proportion), and time point for each outcome. Explanation of the clinical relevance of chosen efficacy and harm outcomes is strongly recommended | Pages 5-6   |
| 3  |                      |    |                                                                                                                                                                                                                                                                                                                                                                                |             |
| 4  |                      |    |                                                                                                                                                                                                                                                                                                                                                                                |             |
| 5  |                      |    |                                                                                                                                                                                                                                                                                                                                                                                |             |
| 6  |                      |    |                                                                                                                                                                                                                                                                                                                                                                                |             |
| 7  |                      |    |                                                                                                                                                                                                                                                                                                                                                                                |             |
| 8  |                      |    |                                                                                                                                                                                                                                                                                                                                                                                |             |
| 9  |                      |    |                                                                                                                                                                                                                                                                                                                                                                                |             |
| 10 |                      |    |                                                                                                                                                                                                                                                                                                                                                                                |             |
| 11 |                      |    |                                                                                                                                                                                                                                                                                                                                                                                |             |
| 12 | Participant timeline | 13 | Time schedule of enrolment, interventions (including any run-ins and washouts), assessments, and visits for participants. A schematic diagram is highly recommended (see Figure)                                                                                                                                                                                               | Page 6      |
| 13 |                      |    |                                                                                                                                                                                                                                                                                                                                                                                |             |
| 14 |                      |    |                                                                                                                                                                                                                                                                                                                                                                                |             |
| 15 |                      |    |                                                                                                                                                                                                                                                                                                                                                                                |             |
| 16 |                      |    |                                                                                                                                                                                                                                                                                                                                                                                |             |
| 17 |                      |    |                                                                                                                                                                                                                                                                                                                                                                                |             |
| 18 |                      |    |                                                                                                                                                                                                                                                                                                                                                                                |             |
| 19 | Sample size          | 14 | Estimated number of participants needed to achieve study objectives and how it was determined, including clinical and statistical assumptions supporting any sample size calculations                                                                                                                                                                                          | Page 12     |
| 20 |                      |    |                                                                                                                                                                                                                                                                                                                                                                                |             |
| 21 |                      |    |                                                                                                                                                                                                                                                                                                                                                                                |             |
| 22 |                      |    |                                                                                                                                                                                                                                                                                                                                                                                |             |
| 23 |                      |    |                                                                                                                                                                                                                                                                                                                                                                                |             |
| 24 |                      |    |                                                                                                                                                                                                                                                                                                                                                                                |             |
| 25 |                      |    |                                                                                                                                                                                                                                                                                                                                                                                |             |
| 26 | Recruitment          | 15 | Strategies for achieving adequate participant enrolment to reach target sample size                                                                                                                                                                                                                                                                                            | Pages 7 - 9 |
| 27 |                      |    |                                                                                                                                                                                                                                                                                                                                                                                |             |
| 28 |                      |    |                                                                                                                                                                                                                                                                                                                                                                                |             |

### Methods: Assignment of interventions (for controlled trials)

#### Allocation:

|    |                                  |     |                                                                                                                                                                                                                                                                                                                                                          |             |
|----|----------------------------------|-----|----------------------------------------------------------------------------------------------------------------------------------------------------------------------------------------------------------------------------------------------------------------------------------------------------------------------------------------------------------|-------------|
| 31 |                                  |     |                                                                                                                                                                                                                                                                                                                                                          |             |
| 32 |                                  |     |                                                                                                                                                                                                                                                                                                                                                          |             |
| 33 | Sequence generation              | 16a | Method of generating the allocation sequence (eg, computer-generated random numbers), and list of any factors for stratification. To reduce predictability of a random sequence, details of any planned restriction (eg, blocking) should be provided in a separate document that is unavailable to those who enrol participants or assign interventions | Pages 6 - 7 |
| 34 |                                  |     |                                                                                                                                                                                                                                                                                                                                                          |             |
| 35 |                                  |     |                                                                                                                                                                                                                                                                                                                                                          |             |
| 36 |                                  |     |                                                                                                                                                                                                                                                                                                                                                          |             |
| 37 |                                  |     |                                                                                                                                                                                                                                                                                                                                                          |             |
| 38 |                                  |     |                                                                                                                                                                                                                                                                                                                                                          |             |
| 39 |                                  |     |                                                                                                                                                                                                                                                                                                                                                          |             |
| 40 |                                  |     |                                                                                                                                                                                                                                                                                                                                                          |             |
| 41 |                                  |     |                                                                                                                                                                                                                                                                                                                                                          |             |
| 42 |                                  |     |                                                                                                                                                                                                                                                                                                                                                          |             |
| 43 |                                  |     |                                                                                                                                                                                                                                                                                                                                                          |             |
| 44 | Allocation concealment mechanism | 16b | Mechanism of implementing the allocation sequence (eg, central telephone; sequentially numbered, opaque, sealed envelopes), describing any steps to conceal the sequence until interventions are assigned                                                                                                                                                | Pages 6 - 7 |
| 45 |                                  |     |                                                                                                                                                                                                                                                                                                                                                          |             |
| 46 |                                  |     |                                                                                                                                                                                                                                                                                                                                                          |             |
| 47 |                                  |     |                                                                                                                                                                                                                                                                                                                                                          |             |
| 48 |                                  |     |                                                                                                                                                                                                                                                                                                                                                          |             |
| 49 |                                  |     |                                                                                                                                                                                                                                                                                                                                                          |             |
| 50 |                                  |     |                                                                                                                                                                                                                                                                                                                                                          |             |
| 51 | Implementation                   | 16c | Who will generate the allocation sequence, who will enrol participants, and who will assign participants to interventions                                                                                                                                                                                                                                | Pages 6 - 8 |
| 52 |                                  |     |                                                                                                                                                                                                                                                                                                                                                          |             |
| 53 |                                  |     |                                                                                                                                                                                                                                                                                                                                                          |             |
| 54 |                                  |     |                                                                                                                                                                                                                                                                                                                                                          |             |
| 55 |                                  |     |                                                                                                                                                                                                                                                                                                                                                          |             |
| 56 | Blinding (masking)               | 17a | Who will be blinded after assignment to interventions (eg, trial participants, care providers, outcome assessors, data analysts), and how                                                                                                                                                                                                                |             |
| 57 |                                  |     |                                                                                                                                                                                                                                                                                                                                                          |             |
| 58 |                                  |     |                                                                                                                                                                                                                                                                                                                                                          |             |
| 59 |                                  |     |                                                                                                                                                                                                                                                                                                                                                          |             |
| 60 |                                  |     |                                                                                                                                                                                                                                                                                                                                                          |             |



- 1  
2 17b If blinded, circumstances under which unblinding  
3 is permissible, and procedure for revealing a  
4 participant's allocated intervention during the trial  
5

6 **Methods: Data collection, management, and analysis**  
7

- 8 Data collection 18a Plans for assessment and collection of outcome, Page 9  
9 methods baseline, and other trial data, including any  
10 related processes to promote data quality (eg,  
11 duplicate measurements, training of assessors)  
12 and a description of study instruments (eg,  
13 questionnaires, laboratory tests) along with their  
14 reliability and validity, if known. Reference to  
15 where data collection forms can be found, if not in  
16 the protocol  
17  
18  
19  
20 18b Plans to promote participant retention and Page 12  
21 complete follow-up, including list of any outcome  
22 data to be collected for participants who  
23 discontinue or deviate from intervention protocols  
24  
25  
26 Data 19 Plans for data entry, coding, security, and Page 10  
27 management storage, including any related processes to  
28 promote data quality (eg, double data entry; range  
29 checks for data values). Reference to where  
30 details of data management procedures can be  
31 found, if not in the protocol  
32  
33  
34 Statistical 20a Statistical methods for analysing primary and Page 12  
35 methods secondary outcomes. Reference to where other  
36 details of the statistical analysis plan can be  
37 found, if not in the protocol  
38  
39  
40 20b Methods for any additional analyses (eg, Page 12  
41 subgroup and adjusted analyses)  
42  
43 20c Definition of analysis population relating to  
44 protocol non-adherence (eg, as randomised  
45 analysis), and any statistical methods to handle  
46 missing data (eg, multiple imputation)  
47

48 **Methods: Monitoring**  
49

- 50 Data monitoring 21a Composition of data monitoring committee Page 10  
51 (DMC); summary of its role and reporting  
52 structure; statement of whether it is independent  
53 from the sponsor and competing interests; and  
54 reference to where further details about its charter  
55 can be found, if not in the protocol. Alternatively,  
56 an explanation of why a DMC is not needed  
57  
58  
59  
60

|    |                                 |     |                                                        |
|----|---------------------------------|-----|--------------------------------------------------------|
| 1  |                                 |     |                                                        |
| 2  |                                 | 21b | Description of any interim analyses and stopping       |
| 3  |                                 |     | guidelines, including who will have access to          |
| 4  |                                 |     | these interim results and make the final decision      |
| 5  |                                 |     | to terminate the trial                                 |
| 6  |                                 |     |                                                        |
| 7  | Harms                           | 22  | Plans for collecting, assessing, reporting, and        |
| 8  |                                 |     | managing solicited and spontaneously reported          |
| 9  |                                 |     | adverse events and other unintended effects of         |
| 10 |                                 |     | trial interventions or trial conduct                   |
| 11 |                                 |     |                                                        |
| 12 |                                 |     |                                                        |
| 13 | Auditing                        | 23  | Frequency and procedures for auditing trial            |
| 14 |                                 |     | conduct, if any, and whether the process will be       |
| 15 |                                 |     | independent from investigators and the sponsor         |
| 16 |                                 |     |                                                        |
| 17 |                                 |     |                                                        |
| 18 | <b>Ethics and dissemination</b> |     |                                                        |
| 19 |                                 |     |                                                        |
| 20 | Research ethics                 | 24  | Plans for seeking research ethics                      |
| 21 | approval                        |     | committee/institutional review board (REC/IRB)         |
| 22 |                                 |     | approval                                               |
| 23 |                                 |     |                                                        |
| 24 | Protocol                        | 25  | Plans for communicating important protocol             |
| 25 | amendments                      |     | modifications (eg, changes to eligibility criteria,    |
| 26 |                                 |     | outcomes, analyses) to relevant parties (eg,           |
| 27 |                                 |     | investigators, REC/IRBs, trial participants, trial     |
| 28 |                                 |     | registries, journals, regulators)                      |
| 29 |                                 |     |                                                        |
| 30 |                                 |     |                                                        |
| 31 | Consent or assent               | 26a | Who will obtain informed consent or assent from        |
| 32 |                                 |     | potential trial participants or authorised             |
| 33 |                                 |     | surrogates, and how (see Item 32)                      |
| 34 |                                 |     |                                                        |
| 35 |                                 |     |                                                        |
| 36 |                                 | 26b | Additional consent provisions for collection and       |
| 37 |                                 |     | use of participant data and biological specimens       |
| 38 |                                 |     | in ancillary studies, if applicable                    |
| 39 |                                 |     |                                                        |
| 40 | Confidentiality                 | 27  | How personal information about potential and           |
| 41 |                                 |     | enrolled participants will be collected, shared, and   |
| 42 |                                 |     | maintained in order to protect confidentiality         |
| 43 |                                 |     | before, during, and after the trial                    |
| 44 |                                 |     |                                                        |
| 45 |                                 |     |                                                        |
| 46 | Declaration of                  | 28  | Financial and other competing interests for            |
| 47 | interests                       |     | principal investigators for the overall trial and      |
| 48 |                                 |     | each study site                                        |
| 49 |                                 |     |                                                        |
| 50 | Access to data                  | 29  | Statement of who will have access to the final trial   |
| 51 |                                 |     | dataset, and disclosure of contractual agreements      |
| 52 |                                 |     | that limit such access for investigators               |
| 53 |                                 |     |                                                        |
| 54 |                                 |     |                                                        |
| 55 | Ancillary and                   | 30  | Provisions, if any, for ancillary and post-trial care, |
| 56 | post-trial care                 |     | and for compensation to those who suffer harm          |
| 57 |                                 |     | from trial participation                               |
| 58 |                                 |     |                                                        |
| 59 |                                 |     |                                                        |
| 60 |                                 |     |                                                        |

|    |                   |     |                                                       |         |
|----|-------------------|-----|-------------------------------------------------------|---------|
| 1  |                   |     |                                                       |         |
| 2  | Dissemination     | 31a | Plans for investigators and sponsor to                | Page 14 |
| 3  | policy            |     | communicate trial results to participants,            |         |
| 4  |                   |     | healthcare professionals, the public, and other       |         |
| 5  |                   |     | relevant groups (eg, via publication, reporting in    |         |
| 6  |                   |     | results databases, or other data sharing              |         |
| 7  |                   |     | arrangements), including any publication              |         |
| 8  |                   |     | restrictions                                          |         |
| 9  |                   |     |                                                       |         |
| 10 |                   |     |                                                       |         |
| 11 |                   | 31b | Authorship eligibility guidelines and any intended    | Page 14 |
| 12 |                   |     | use of professional writers                           |         |
| 13 |                   |     |                                                       |         |
| 14 |                   | 31c | Plans, if any, for granting public access to the full |         |
| 15 |                   |     | protocol, participant-level dataset, and statistical  |         |
| 16 |                   |     | code                                                  |         |
| 17 |                   |     |                                                       |         |
| 18 |                   |     |                                                       |         |
| 19 | <b>Appendices</b> |     |                                                       |         |
| 20 |                   |     |                                                       |         |
| 21 | Informed consent  | 32  | Model consent form and other related                  |         |
| 22 | materials         |     | documentation given to participants and               |         |
| 23 |                   |     | authorised surrogates                                 |         |
| 24 |                   |     |                                                       |         |
| 25 |                   |     |                                                       |         |
| 26 | Biological        | 33  | Plans for collection, laboratory evaluation, and      |         |
| 27 | specimens         |     | storage of biological specimens for genetic or        |         |
| 28 |                   |     | molecular analysis in the current trial and for       |         |
| 29 |                   |     | future use in ancillary studies, if applicable        |         |
| 30 |                   |     |                                                       |         |

---

\*It is strongly recommended that this checklist be read in conjunction with the SPIRIT 2013 Explanation & Elaboration for important clarification on the items. Amendments to the protocol should be tracked and dated. The SPIRIT checklist is copyrighted by the SPIRIT Group under the Creative Commons "[Attribution-NonCommercial-NoDerivs 3.0 Unported](https://creativecommons.org/licenses/by-nc-nd/3.0/)" license.

# BMJ Open

## Impact of Pulse Oximetry on Hospital Referral Acceptance in Children under 5 with Severe Pneumonia in Rural Pakistan (District Jamshoro): Protocol for a Cluster Randomized Trial

|                                 |                                                                                                                                                                                                                                                                                                                                                                                                                                                                                                                                                                                                                                                                                                                                             |
|---------------------------------|---------------------------------------------------------------------------------------------------------------------------------------------------------------------------------------------------------------------------------------------------------------------------------------------------------------------------------------------------------------------------------------------------------------------------------------------------------------------------------------------------------------------------------------------------------------------------------------------------------------------------------------------------------------------------------------------------------------------------------------------|
| Journal:                        | <i>BMJ Open</i>                                                                                                                                                                                                                                                                                                                                                                                                                                                                                                                                                                                                                                                                                                                             |
| Manuscript ID                   | bmjopen-2020-046158.R1                                                                                                                                                                                                                                                                                                                                                                                                                                                                                                                                                                                                                                                                                                                      |
| Article Type:                   | Protocol                                                                                                                                                                                                                                                                                                                                                                                                                                                                                                                                                                                                                                                                                                                                    |
| Date Submitted by the Author:   | 08-Apr-2021                                                                                                                                                                                                                                                                                                                                                                                                                                                                                                                                                                                                                                                                                                                                 |
| Complete List of Authors:       | Mir, Fatima; Aga Khan University, Pediatrics and Child Health; Aga Khan University, Aga Khan University<br>Ali Nathwani, Apsara; Aga Khan University, chandar, suhail; Aga Khan University, Paediatrics and child health<br>Hussain, Amjad; Aga Khan University, Pediatrics and Child Health<br>Rizvi, Arjumand; Aga Khan Medical University, Pediatrics and Child Health<br>Ahmed, Imran; Aga Khan University<br>Memon, Zahid Ali; Aga Khan University, Centre of Excellence in Women and Child Health<br>Habib, Atif; Aga Khan University, Department of Paediatrics & Child Health<br>Soofi, Sajid; Aga Khan University Hospital, Paediatric & Child Health<br>Bhutta, Zulfiqar; Aga Khan University, Division of Women and Child Health |
| <b>Primary Subject Heading</b>: | Global health                                                                                                                                                                                                                                                                                                                                                                                                                                                                                                                                                                                                                                                                                                                               |
| Secondary Subject Heading:      | Health services research, Infectious diseases, Paediatrics, Public health                                                                                                                                                                                                                                                                                                                                                                                                                                                                                                                                                                                                                                                                   |
| Keywords:                       | Public health < INFECTIOUS DISEASES, Paediatric infectious disease & immunisation < PAEDIATRICS, PUBLIC HEALTH, RESPIRATORY MEDICINE (see Thoracic Medicine), Clinical trials < THERAPEUTICS                                                                                                                                                                                                                                                                                                                                                                                                                                                                                                                                                |
|                                 |                                                                                                                                                                                                                                                                                                                                                                                                                                                                                                                                                                                                                                                                                                                                             |

SCHOLARONE™  
Manuscripts



I, the Submitting Author has the right to grant and does grant on behalf of all authors of the Work (as defined in the below author licence), an exclusive licence and/or a non-exclusive licence for contributions from authors who are: i) UK Crown employees; ii) where BMJ has agreed a CC-BY licence shall apply, and/or iii) in accordance with the terms applicable for US Federal Government officers or employees acting as part of their official duties; on a worldwide, perpetual, irrevocable, royalty-free basis to BMJ Publishing Group Ltd ("BMJ") its licensees and where the relevant Journal is co-owned by BMJ to the co-owners of the Journal, to publish the Work in this journal and any other BMJ products and to exploit all rights, as set out in our [licence](#).

The Submitting Author accepts and understands that any supply made under these terms is made by BMJ to the Submitting Author unless you are acting as an employee on behalf of your employer or a postgraduate student of an affiliated institution which is paying any applicable article publishing charge ("APC") for Open Access articles. Where the Submitting Author wishes to make the Work available on an Open Access basis (and intends to pay the relevant APC), the terms of reuse of such Open Access shall be governed by a Creative Commons licence – details of these licences and which [Creative Commons](#) licence will apply to this Work are set out in our licence referred to above.

Other than as permitted in any relevant BMJ Author's Self Archiving Policies, I confirm this Work has not been accepted for publication elsewhere, is not being considered for publication elsewhere and does not duplicate material already published. I confirm all authors consent to publication of this Work and authorise the granting of this licence.

1  
2  
3  
4  
5 **Impact of Pulse Oximetry on Hospital Referral Acceptance in Children under 5 with**  
6 **Severe Pneumonia in Rural Pakistan (District Jamshoro): Protocol for a Cluster**  
7 **Randomized Trial**  
8  
9

10  
11 **Fatima Mir<sup>1\*</sup>, Apsara Ali Nathwani<sup>2</sup>, Suhail Chanar<sup>2</sup>, Amjad Hussain<sup>2</sup>, Arjumand Rizvi<sup>2</sup>,**  
12 **Imran Ahmed<sup>2</sup>, Zahid Memon<sup>2</sup>, Muhammad Atif Habib<sup>2</sup>, Sajid Soofi<sup>1,2</sup>, Zulfiqar A Bhutta<sup>2</sup>**  
13  
14

15  
16 **Affiliations**  
17

18  
19 <sup>1</sup>Department of Pediatrics and Child Health, The Aga Khan University, Pakistan  
20

21 <sup>2</sup>Centre of Excellence in Women & Child Health, The Aga Khan University, Pakistan.  
22  
23  
24  
25  
26  
27  
28  
29

30 **\*Corresponding author**  
31

32 Dr. Fatima Mir

33 Associate Professor

34 Department of Pediatrics and Child Health, the Aga Khan University

35 Stadium Road, Karachi 74800

36 Pakistan

37 Email: [fatima.mir@aku.edu](mailto:fatima.mir@aku.edu)

38 Phone: +92 3005844610  
39  
40  
41  
42  
43  
44  
45

46 **Key words:** Severe pneumonia, hypoxemia, pulse-oximetry, Lady Health Workers (LHWs),  
47 community case management pneumonia, hospital referral.  
48  
49  
50  
51  
52  
53  
54  
55  
56  
57  
58  
59  
60

## Abstract

**Background:** Pneumonia is a leading cause of death among children under five specifically in South Asia and Sub-Saharan Africa. Hypoxemia is a life-threatening complication among children under five with pneumonia. Hypoxemia increases risk of mortality by 4.3 times in children with pneumonia than those without hypoxemia. Prevalence of hypoxemia varies with geography, altitude and severity (9-39% Asia, 3-10% African countries). In this protocol paper we describe research methods for assessing impact of lady health workers identifying hypoxemia in children with signs of pneumonia during household visits on acceptance of hospital referral in District Jamshoro, Sindh.

**Methods and Analysis:** A cluster randomized controlled trial using pulse oximetry as intervention for children with severe pneumonia will be conducted in community settings. Children aged 0-59 months with signs of severe pneumonia will be recruited by Lady Health Workers (LHWs) during routine visits in both intervention and control arms after consent. Severe pneumonia will be defined as fast breathing and/or chest in-drawing, and, one or more danger sign and/or hypoxemia ( $SaO_2 < 92\%$ ) in PO (intervention) group and fast breathing and/or chest in-drawing and 1/more danger sign in clinical signs (control) group. Recruits in both groups will receive a stat dose of oral amoxicillin and referral to designated tertiary health facility. Analysis of variance will be used to compare baseline referral acceptance in both groups with that at end of study.

**Ethics and Dissemination:** Ethical approval was granted by the Ethics Review Committee of the Aga Khan University (4722-Ped-ERC-17), Karachi. Study results will be shared with relevant government and non-governmental organizations, presented at national and international research conferences and published in international peer-reviewed scientific journals.

**Trial registration:** Clinicaltrials.gov Registry NCT03588377. Trial registration Date: May 05, 2018. Last update Date: July 31 2020. Study Status: ongoing

## Article Summary

### Strengths and Limitations of this study

- Our study will directly assess impact of pulse oximetry on family referral acceptance by comparing family acceptance of hospital referral (verbal acceptance with hospital visit) in ‘pulse oximetry and clinical signs’ group with ‘clinical signs alone’ group
- The study has applicability because it assesses impact with ‘real-life’ limitations (variability in lady health worker accuracy in identifying severe pneumonia, availability of oxygen and human resource at referral hospital and, availability of private transportation)
- The study design provides means of minimizing the effect of confounding
- The study design avoids bias in allocation to exposure groups
- Blinding is not possible due to nature of intervention
- Some subjects may fail to adhere to protocol and non-adherence may cause an underestimated measure of association.



## Introduction

Pneumonia accounts for an estimated 18% of under-5 mortality across the globe [1] Majority of these pneumonia-specific deaths occur in 15 countries, in which Pakistan ranks fifth. [2] Failure to seek early care and delays in hospital referral are commonly acknowledged determinants of mortality in childhood pneumonia with a higher proportion reported from rural settings than urban. [3-6] Acceptance rates of ‘facilitated’ hospital referral advice have been reported low between 8% and 23% for sick young infants in peri-urban Karachi. [7, 8] They are even lower for non-facilitated referral in rural settings in children under 5 with severe pneumonia in rural Matiari district, Sindh. [5] The prominent reasons in developing countries behind this delay are inability to recognize seriousness of pneumonia, distance from health facility and lack of money for private health care. [9, 10]

In 1994, the Government of Pakistan introduced the Lady Health Worker (LHW) Program in rural populations with low physician density to address common health problems in women and children under 5 through household visits. To date, a team of over 110,000 LHWs are working for the program nationwide with 23,185 LHWs in Sindh alone [11]. Each LHW is responsible for a population of 1000–1500 individuals (catchment of about 100 families). Recruits are preferably local, with a minimum of 8 years of formal schooling followed by 15 months of training to deliver maternal and child health (MCH) care in community settings. During a monthly home visit, the LHW provide essential maternal and child health care services including family planning needs, nutritional assessments of both mother and child, management of minor and common illnesses, improving immunization coverage and imparting health education. [12]

This study recognizes the LHW as a powerful conduit for reaching under 5 children at household level and identifying severe pneumonia in under five at an early stage. It also recognizes the underestimation of hypoxemia ( $SpO_2$  of  $<90\%$ ), a major risk factor for pneumonia mortality at community level and assesses its prevalence. The reported prevalence of hypoxemia in under 5 acutely ill children is 5 to 58% in facilities [13-16] and 16 to 39% in community settings. [17] A 4.3 times higher risk of mortality has been associated with pneumonia with hypoxemia than in children with pneumonia without hypoxemia. [13] Hypoxemia is also predictive of treatment failure with amoxicillin in 3-59 months old children. [18] In resource poor settings where pulse oximetry is not feasible, signs and symptoms of severe pneumonia (sleepiness, cyanosis, head

1  
2  
3 nodding/grunting, and inability to move) are used as predictors of hypoxemia. However, the  
4 validity of clinical signs to predict hypoxemia varies and it is often difficult for physicians  
5 working in settings, where objective detection of hypoxemia is not available, to decide whether  
6 the child coming with severe pneumonia requires administration of oxygen or not. [15, 19, 20]  
7  
8  
9

10 Pulse oximetry [16] is a rapid, portable, non-invasive and accurate method of measuring arterial  
11 hemoglobin oxygenation (SpO<sub>2</sub>) and has therefore been used in trial and clinical settings to  
12 detect hypoxemia. Appropriate oxygen therapy (based on PO findings rather than clinical signs  
13 of severity alone) has been associated with lower mortality risk. [19] Assuming access to  
14 supplemental oxygen, PO could potentially avert up to 148,000 severe pneumonia related deaths  
15 if implemented, and, combining PO with IMCI assessment for pneumonia has been shown to be  
16 cost effective in 15 high burden countries. [21] Emdin et al found first level Lady Health  
17 Workers in peri-urban Karachi could easily perform pulse oximetry on young infants on well and  
18 sick visits to a primary health care facility. [22]  
19  
20  
21  
22  
23  
24  
25

26 Over the past decade, the possible impact of pulse oximetry in hospital and community settings  
27 has been of interest across the globe. Health survey of 54 countries in 2010, suggested that  
28 19.2% of the operating theatres around the globe are not equipped with pulse oximeters [23].  
29 Trials assessing utility of pulse oximetry on a health systems level in Nigeria have shown that  
30 health workers reserve PO for the sickest patients [24, 25]. This has also been observed in areas  
31 at higher altitudes with higher prevalence of hypoxemia (highlands of Papua New Guinea) [25,  
32 26]. There is lack of clarity about how pulse oximetry can be used in the community where  
33 lower hypoxemia prevalence may be a lesser incentive for health workers to use PO such as in  
34 interior Sindh settings in Pakistan. Then again, health workers recruited from within  
35 communities may be better invested and motivated than hospital personnel in following case  
36 management guidelines precluding PO. It is therefore worthwhile to explore and describe  
37 contexts behind a family's acceptance (or not) of referral advice whether based on technology  
38 and/or clinical examination in rural settings where the highest burden of pneumonia deaths lies.  
39  
40  
41  
42  
43  
44  
45  
46  
47  
48

49 Feasibility and sustainability audits of oxygen delivery systems in the Gambia and Egypt have  
50 shown that providing technology alone is ineffective, and should preclude provision of supplies,  
51 education, training and feedback [27-30]. This protocol paper describes a study to assess the  
52  
53  
54  
55  
56  
57  
58  
59  
60

1  
2  
3 effect of PO monitoring in community settings on hospital referral acceptance in children under  
4 5 with severe pneumonia.

## 6 7 **Methods**

### 8 9 **Study aims and design:**

10  
11 The overall aim of the study is to assess if detection of hypoxemia and/or severe pneumonia in  
12 children 0-59 months by LHWs during their monthly home visits will increase hospital referral  
13 acceptance among families in District Jamshoro, Sindh, Pakistan.

14  
15 Specific objectives are:

- 16  
17 1) To assess and compare the impact of ‘pulse oximetry’ used by LHWs at household level  
18 on increasing hospital referral acceptance rates in intervention clusters (district Jamshoro)  
19 for 0-59 months old children with severe pneumonia with the impact of LHWs using  
20 clinical signs alone in non-intervention clusters of the same district
- 21  
22 2) To determine prevalence of severe pneumonia  $\pm$  hypoxemia in 0-59-month olds
- 23  
24 3) To investigate the likely predictors (demographic, clinical) of hospital referral acceptance  
25 in both the groups
- 26  
27 4) To compare clinical outcomes (treatment completion, treatment failure, hypoxemia) of  
28 children 0-59 months who accepted referral to those who refused admission and were  
29 treated at home

30  
31 A community-based cluster randomized trial will be conducted in district Jamshoro, among  
32 children of ages 0-59 months (**Figure 1**). In intervention areas, all children with cough, fever or  
33 difficulty in breathing (acute respiratory illness) will be assessed for study eligibility/referral  
34 criteria (signs and symptoms of severe pneumonia, OR hypoxemia alone, OR severe pneumonia  
35 with hypoxemia) by LHWs during their monthly home visit in their catchment area. In control  
36 areas, study eligibility will require detection of signs of severe pneumonia alone (Appendix 1)  
37 during LHW monthly visits. Data will be collected on demographics, likely predictors, and  
38 clinical outcomes using a structured questionnaire.

39  
40 The primary outcome is hospital referral acceptance in children under 5 with severe pneumonia  
41 and to identify demographic and clinical predictors of hospital referral acceptance. The

1  
2  
3 predictors will include distance of child home to referral facility, socio-economic status of  
4 household, parental education, child age, nutritional status, respiratory rate, temperature,  
5 hypoxemia and presence of other illnesses.  
6  
7

8  
9 Secondary outcomes include duration of oxygen therapy, treatment failure, duration of hospital  
10 stay, vital and health status of child at day 7<sup>th</sup> and 14<sup>th</sup>.  
11

### 12 **Trial setting:**

13  
14  
15 The study will be conducted within the community of Taluka Kotri in District Jamshoro, Sindh  
16 **(Figure 2)**. Jamshoro District has a population of 993,142 [31]. It is predominantly rural, with  
17 33% literacy, and >50% employed daily wage laborers. A baseline survey conducted as a part of  
18 current study showed the status of overall health indicators: skilled birth attendance 57%,  
19 antenatal care coverage 75%, postnatal care cover for mother and newborn within 48 hours  
20 31.5%, vaccination completeness in children 12-23 months 68% and care seeking for ARI and  
21 diarrhea >80% (internal survey). A total of 27 health facilities function in the district including  
22 one District Headquarter (DHQ) Hospital, three Taluka Headquarter (THQ) Hospitals, five Rural  
23 Health Centers (RHCs) and 18 Basic Health Units (BHUs). The district is divided  
24 administratively in 30 union councils. Kotri is one of the 4 Talukas of Jamshoro, consists of 44%  
25 (437,561) of the population of district [31].  
26  
27  
28  
29  
30  
31  
32  
33

34  
35 Participants will be the permanent residents of Kotri, Jamshoro and recruited from their homes  
36 during routine monthly visits by Lady Health Workers serving in their catchment areas. This  
37 study is expected to run for 48 months with participant identification and enrolment conducted  
38 simultaneously in intervention and control clusters over 21 months after an initial pilot of one  
39 month. Each enrolled child will be revisited at day 7 and 14 for outcome measurement.  
40  
41  
42

### 43 **Participant:**

44  
45 Any child aged 0-59 months having signs and symptoms of acute respiratory illness (cough,  
46 fever, difficulty in breathing) in intervention clusters will undergo assessment of 1) signs and  
47 symptoms of severe pneumonia and, 2) pulse oximetry during monthly LHW home visits.  
48 Presence of severe pneumonia with or without hypoxemia, or hypoxemia alone will merit  
49 hospital referral (non-facilitated). Any child aged 0-59 months having signs and symptoms of  
50 acute respiratory illness (cough, fever, difficulty in breathing) in control clusters will undergo  
51  
52  
53  
54  
55  
56  
57  
58  
59  
60

1  
2  
3 assessment of 1) signs and symptoms of severe pneumonia alone. Presence of severe pneumonia  
4 will merit hospital referral (non-facilitated). Exclusion criteria will include lack of consent and,  
5 non-availability (lost to follow up, migration) on days of scheduled follow-up visits (days 7 and  
6 14). Those who accepted referral but did not show up at hospital will be included in final  
7 analysis (**Appendix 1**).  
8  
9

### 10 11 12 **Randomization and masking:** 13

14 Study clusters were defined as the area covered by an LHW. Each LHW covers a minimum of  
15 100 households. A list of LHWs working in Kotri was collected from the LHW program, Health  
16 Department Government of Sindh. There are a total of 188 active LHWs in the study site. A  
17 baseline survey was conducted to collect data on health indicators from the LHW catchments.  
18 The clusters were randomly allocated to intervention and control groups on 1:1 fashion with a  
19 computer-generated randomization sequence that was generated by an independent expert.  
20 Clusters were matched on under-5 population and distance to referral health facility. No  
21 stratification was used for allocation; clusters were selected to ensure that the reporting and  
22 training centres of intervention and control LHWs were separate. The investigators and the  
23 national and provincial LHW program coordinators will be excluded from the allocation process.  
24  
25  
26  
27  
28  
29  
30  
31

### 32 **Training of Lady Health Workers:** 33

34 The Lady Health Worker (LHW) program of Pakistan consists of a community based group of  
35 first-level health workers with the principal mandate of home-based Maternal and Child Health.  
36  
37 The recruitment process is well defined and selection criteria include: at least 8 years of  
38 education with middle school pass, local residency, recommendation from the community, and  
39 preferably married [32]. Once selected, they receive 15 months of basic training in mid-wifery  
40 and family planning using standardized training manuals and curriculum, and periodic refresher  
41 training courses. Each of these LHWs is typically responsible for approximately 1000 people, or  
42 150 homes, and often serve as the primary health care contact in these rural communities [32,  
43 33].  
44  
45  
46  
47  
48  
49  
50  
51  
52  
53  
54  
55  
56  
57  
58  
59  
60

1  
2  
3 We chose LHWs as study personnel due to their access to homes on regular monthly basis. We  
4 trained intervention and control LHWs in separate groups for all of the following: 1)  
5 classification of ARI (no pneumonia, pneumonia, severe pneumonia) using standard acute  
6 respiratory infections training modules (WHO and IMNCI) 2) identification of danger signs 3)  
7 case management of pneumonia at home with oral amoxicillin and severe pneumonia with stat  
8 dose of antibiotic before hospital referral. Intervention LHWs received an additional training in  
9 using a pulse oximeter and obtaining a valid reading. The Principal Investigator led these  
10 training sessions with senior trainers of the LHW program (Lady Health Supervisors).  
11  
12  
13  
14  
15  
16

### 17 **Participant Recruitment and Study Procedures:**

#### 18 **Intervention delivery**

19  
20  
21 Children aged 0–59 months with cough and/or difficult breathing during regular home visits of  
22 LHWs will be assessed for firstly, signs and symptoms of severe pneumonia (fast breathing/chest  
23 in-drawing and one or more danger sign (unable to eat/drink, vomiting, convulsion and  
24 lethargy/unconsciousness) and/or Stridor)) and secondly, hypoxemia ( $SpO_2 < 92\%$ ) using a  
25 handheld pulse oximeter (Masimo Rad-5v) to measure blood oxygen saturation level. LHWs will  
26 also do case management of children with pneumonia and severe pneumonia. A 3-day course of  
27 oral amoxicillin will be given to children with pneumonia at home, whereas children meeting  
28 referral criteria (severe pneumonia alone, hypoxemia alone, or severe pneumonia and  
29 hypoxemia) after obtaining informed consent, will be administered a stat dose of oral amoxicillin  
30 and referred to nearest referral hospital (DHQ Kotri).  
31  
32  
33  
34  
35  
36  
37  
38

39  
40 The study investigators will have provided these pulse oximeters to the LHW Program in  
41 advance and highlighted which ones will receive them. Physicians at the referral center serving  
42 the intervention clusters will also receive handheld pulse oximeters. All the LHWs and staff will  
43 be trained on the use, and maintenance of these pulse oximeters. Children with severe pneumonia  
44 with or without hypoxemia will be advised to go to hospital for antibiotics and oxygen, using the  
45 PO reading as a tool to convince parents. Children with hypoxemia alone, without signs of  
46 severe pneumonia will be referred to hospital to rule out cyanotic congenital heart disease. Name  
47 of the pre-designated health facility with available oxygen and study physician will be provided  
48 to all the LHWs so that Study Workers (non-LHW study personnel) can coordinate with Study  
49 Physicians and ensure the patient has reached and is receiving safe and recommended care at  
50  
51  
52  
53  
54  
55  
56  
57  
58  
59  
60

1  
2  
3 referral facility. Project staff will pretest and regularly monitor PO accuracy and quality of  
4 readings.  
5

6  
7 Hypoxemia will be defined as an arterial oxygen saturation (SpO<sub>2</sub>) <92%. SpO<sub>2</sub> measurement  
8 will be recorded after 1 minute of stable observation. If the SpO<sub>2</sub> comes 92% or less, the child  
9 will first be assessed for nasal obstruction with readings repeated after applying nasal saline  
10 drops. If repeat reading shows hypoxemia, the child will be referred to nearest designated referral  
11 hospital and admitted for oxygen via nasal or nasopharyngeal route and intravenous antibiotics,  
12 as per recommendations.  
13  
14  
15  
16

### 17 **Implementation of active control: Clinical Signs assessment**

18  
19  
20 Children aged 0–59 months with cough and/or difficult breathing during regular home visit will  
21 be assessed by LHWs for signs and symptoms of severe pneumonia (fast breathing/chest in-  
22 drawing and one or more danger sign (unable to eat/drink, vomiting, convulsion and  
23 lethargy/unconsciousness) and/or Stridor)). A 3-day course of oral amoxicillin will be given to  
24 children with pneumonia at home, whereas children with severe pneumonia (eligible for  
25 recruitment) will be requested for informed consent and offered stat dose of oral amoxicillin and  
26 referral to nearest referral hospital.  
27  
28  
29  
30  
31

### 32 **Procedure at referral facility**

33  
34  
35 Children who accept hospital referral in both intervention and control clusters, and reach hospital  
36 premises with LHW referral slip will be assessed by study physician at the referral center. An  
37 SMS notification with brief details of referred child will have been provided to trained study  
38 personnel (study physician) in advance at time of referral at both the referral facilities. Children  
39 with severe pneumonia and/or hypoxemia as per LHWs who reach referral hospital premises will  
40 be examined and subjected to pulse oximetry again by the study physician at referral facility. If  
41 signs and symptoms of severe pneumonia are present, the child will be admitted for further  
42 appropriate treatment (Oxygen therapy via nasal or nasopharyngeal route and intravenous  
43 antibiotics etc.) and if the symptoms are not severe (absence of danger sign), the child will be  
44 treated in outpatient care as per the standard of referral facility. All the children admitted at  
45 referral facility will undergo 12 hourly monitoring by study personnel and filling of case  
46 reporting form (CRF) and hospital physician form (HPF) at day 1, 7 and 14. Those children who  
47  
48  
49  
50  
51  
52  
53  
54  
55  
56  
57  
58  
59  
60



1  
2  
3 refused the referral will be visited by study community health workers after 24 hours to confirm  
4 referral refusal and to fill CRF.  
5

6  
7 Preliminary meetings will be held with the Executive Director Health Jamshoro, Director  
8 General Health Sindh, In-charge Lady Health Worker Program Sindh and In-charge Pediatric  
9 Units LUMHS to ensure their cooperation through study duration. Emergency and pediatric unit  
10 staff at the referral facilities along with study personnel (physician/nurse) will be trained on  
11 management of severe pneumonia according to the integrated management of neonatal and  
12 childhood illnesses (IMNCI) guidelines [34]. A baseline survey will be conducted at the health  
13 facilities to ensure availability of oxygen and necessary intravenous antibiotics. Even though it is  
14 ideal to guarantee sustainable oxygen systems at the two chosen referral public sector hospitals,  
15 this study does not provide oxygen and therefore aims to assess ‘real-life’ situations in public  
16 hospitals and their impact on severe pneumonia outcomes with or without hypoxemia. LHWs  
17 will be incentivized on basis of their contribution to the study activities.  
18  
19  
20  
21  
22  
23  
24  
25

### 26 **Data Collection and Storage**

27  
28 Data will be collected by LHWs during house visits (Screening form), community health  
29 workers (during follow up visits day 1, 7 and 14) and hospital based study personnel (for all who  
30 accept referral and reach hospital premises) on paper forms (**Appendix 2**). Given that it will be a  
31 new experience for LHWs to assess, classify and manage ARI cases and at the same time record  
32 findings on data forms accurately, these will be supervised closely and frequently, at least for the  
33 first pneumonia season. Well trained study field supervisory officers and LHW supervisors will  
34 be required to perform regular field supervision in their respective clusters and ensure accurate  
35 and logically entered data forms and make necessary verifications and corrections at the data  
36 collection sites and give feedback to the LHW to avoid repeating the errors. Raw data brought to  
37 the program office will be checked once again for accuracy by the technical staff and approved  
38 for entry in the computer. All raw data will be safely kept in the AKU office, appropriately  
39 numbered by cluster, until seven years after the study is over.  
40  
41  
42  
43  
44  
45  
46  
47  
48  
49

### 50 **Case History Records**

51  
52 These include the study case report forms (CRF) and hospital physician form (HPF) that will  
53 contain information that documents the child’s eligibility to participate in the study, the signed  
54 consent form, and information from tests and examinations. Wherever possible copies of  
55  
56  
57  
58  
59  
60



1  
2  
3 supporting documentation for the information contained in the CRF should be kept with each  
4 patient's case history record. This supporting documentation may include records of physical  
5 examinations, progress notes, laboratory reports, X-rays, consultations, correspondence,  
6 information and data on the subject's condition, during and after the clinical investigation,  
7 diagnoses made, concomitant therapy, etc. All information in the case history records should be  
8 attributable to a specific individual. Since the CRF will not contain the patient's name, there will  
9 be a unique link between the ID number on the CRF and the patient's name. Each child's case  
10 history record will be evaluated to verify validity and completeness of the data on the CRF when  
11 a study monitor visits the study site. All corrections to CRF's must be made without obscuring  
12 the original entry. The revised entry should be inserted and the person making the correction  
13 should sign and date the correction. Only authorized study personnel may complete or correct  
14 case report forms.

### 24 **Data Management**

25  
26 Screening data will be collected on paper by LHWs. Case reporting form (CRF) and Hospital  
27 physician form will be collected on electronic forms. To ensure proper implementation of the  
28 intervention, the field supervisors will make spot checks and will arrange monthly refresher  
29 group sessions of the first-line health workers in which the problems encountered will be  
30 discussed and resolved. In addition, the data collection activity will be carried out by teams  
31 consisting of LHWs/CHWs and study staff will be further monitored by field supervisors who  
32 will perform a check on a subset (5%) of households.

33  
34 An information system will be set up to keep track all patients screened and enrolled and a filing  
35 system to keep all study related records - case history records, study protocol or related  
36 documentation and drug distribution records. The coordinator at the site will be responsible for  
37 the completeness and accuracy of all the study materials.

### 46 **Study Protocol and Related Documentation**

47  
48 All study related documents including the study protocol, manuals of operations, all  
49 correspondence sent to or received from the study monitor, materials used for obtaining informed  
50 consent, protocol modifications and records of the Institutional Review Board approval and all  
51 communications with the IRB must be maintained in complete form. These documents will be  
52  
53  
54  
55  
56  
57

1  
2  
3 evaluated to ensure that study documentation is complete and current when a study monitor visits  
4 the study site.  
5

### 6 7 **Record Retention** 8

9 Retention of accurate and complete records is essential to establish the validity and completeness  
10 of the study. All records must be retained for 7 years after the data set is frozen. Electronic data  
11 will be de-identified, unlinked from any personal identifiers and therefore will protect individual  
12 identity.  
13  
14  
15

### 16 17 **Reporting of Serious Adverse Events and Treatment Failures** 18

19 Amoxicillin is in widespread use and is not investigational in any study site. However, since oral  
20 amoxicillin is not routinely recommended for initial treatment of children who have severe  
21 pneumonia, the appropriate case report forms describing the occurrence of a serious adverse  
22 event, treatment failure or death must be faxed to the coordinating center within 72 hours of the  
23 site coordinator knowing about the event. Adverse events, treatment failure and death must be  
24 reported to allow appropriate interpretation of this critical information. If the outcome of the  
25 adverse event is unknown when the site coordinator first notifies the coordinating center, a  
26 follow-up form must be faxed to the coordinating center within 10 days of knowing about the  
27 event. The PI should send a copy of the adverse event data to their local IRB as soon as possible.  
28 The coordinating center will summarize the Adverse Event and Death information and send a  
29 report to the IRB/ERC of sponsors and to site IRBs. Both the rate of adverse events and the rate  
30 of patient accrual at each individual site will be monitored to determine if stopping rules are met.  
31 We do not anticipate serious adverse events. However, in case of one, a DSMB will be requested  
32 for and convened on ad hoc basis for safety review at any time during the study if there is a  
33 concern regarding rates of adverse events or rates of patient accrual. Adverse events will be  
34 reported by the study physician to the principal investigator and clinically managed by the study  
35 physician in conjunction with other physicians at the institution. Any related and unexpected life-  
36 threatening adverse event including death will be reported to the IRB within 2 business days as  
37 per IRB protocol and any related, unexpected and serious adverse event will be reported to the  
38 IRB within 10 business days as per IRB protocol.  
39  
40  
41  
42  
43  
44  
45  
46  
47  
48  
49  
50  
51  
52  
53  
54  
55  
56  
57  
58  
59  
60

## **Compliance with and Deviations from the Study Protocol**

The Site coordinator must agree with and sign the protocol and confirm in writing that he or she has read, understands and will work according to the protocol and Good Clinical Practice. The Site coordinator is responsible for making sure that the protocol is strictly followed and should not make any changes to the study unless necessary to eliminate an apparent immediate hazard or damage to a trial subject. Any deviations from the study protocol including but not limited to inappropriate enrollment of a study subject, administration of the wrong study treatment, missed doses of study treatment, missed observation points, incorrect administration of concomitant medications, etc. should be reported to the coordinating center and each site's IRB. The report should include a plan to rectify any problems at the site that may have caused the protocol deviation.

### **Sample size:**

Defining a cluster as (the catchment area of) one Lady Health Worker (LHW), and assuming a power of 90% in detecting 50% increase in referral acceptance from a 10 % baseline to 15% among 2-59 month old children with severe pneumonia (pneumonia prevalence at 2 week recall (MICS Sindh):7.5% (18% of which is assumed severe Pneumonia) with ICC 0.001736. We need to capture a total of 4160 children with severe pneumonia in both intervention and control groups.

### **Data Analysis:**

The primary analysis for each outcome will perform on an 'intention-to-treat' (ITT) basis, i.e. all children included in the analysis who were enrolled in the study according to the group to which they were allocated. All analyses will account for the cluster-randomized design to ensure correct type I error rates and confidence intervals [35]. Baseline characteristics will be compared by analyzing differences in means and proportions among the study arms. Categorical outcomes will be compared using chi square test and continuous outcomes using Student's t-test. For analysis of predictors of referral acceptance, generalized linear model will be used with logit link function. The univariate analysis will be conducted to explore the independent effect of each predictor on outcome. The variables significant at a liberal p-value of <0.20 will be included in multivariate model for adjustment. The results will be reported as relative risk (RR) with 95% CI. Type 1 error will be set at 5% level. All analysis will be done using STATA version 15.

## Patient and Public Involvement

Patients or the public will not be involved in the design or conduct of the study. Results will be disseminated to the community.

## Study Status

Recruitment began in August 2019 and field activities and data collection are in process with end date Dec 31, 2021. As of 16<sup>th</sup> October 2020, a total of 235 cases and 184 controls have been enrolled. Extension of study duration is in discussion to achieve sample size.

## Discussion

Hypoxemia, a frequent complication of severe pneumonia, is a major risk factor for death in children under 5. Theoretically, detection of hypoxemia at community level among severe pneumonia cases by the use of pulse-oximeter would give awareness to the caregivers about severity of illness and reduce delay in hospital referral. Delayed care-seeking is a recognized risk factor in pneumonia mortality in community settings [36]. Unfortunately, information on prevalence of hypoxemia, effectiveness of its detection in influencing parents to seek hospital care (gold standard for severe pneumonia), and impact of appropriate care at hospital in settings like Pakistan is lacking. Thus, the findings of this study will build evidence for utility of providing front-line workers like LHWs with a tool to detect hypoxemia if signs and symptoms of pneumonia are present. Interestingly various groups across the world are now espousing pulse-oximetry with other strengths like detection of congenital heart disease [37, 38] and newborn sepsis [39].

## Limitations

Some union councils with poor LHW coverage were not included in this study. This was a compromise on generalizability in favour of feasibility. It may have led to exclusion of children whose referral patterns were important to gauge. We also did not offer facilitated referral in either arm. This may have affected referral acceptance in both groups however will allow assessment of real-life impact of transportation barriers.

Though we kept hospital referral (as recommended by WHO) for severe pneumonia as our standard of care, it was beyond the scope of this study to ensure that referral centres had sustainable oxygen systems/capacity for non-invasive ventilation in children with severe

1  
2  
3 pneumonia, or readily available cardiac evaluation resources for children with hypoxemia alone.  
4 Duke et al showed improved case fatality rates by providing oxygen concentrators and pulse-  
5 oximeters at five hospitals in PNG along with protocols for use [35]. Lack of quality care at  
6 referral hospitals in developing countries is a recognized barrier to health care seeking  
7 behavior[40, 41].  
8  
9

10  
11  
12 If our study reveals pulse-oximetry has influenced health-seeking behavior significantly, we will  
13 need to follow with a more systematic evaluation of pneumonia care at rural hospitals which  
14 vary in quality of care. We will also need to correlate recovery rates in those who accepted  
15 hospital referral versus those who stayed home on oral amoxicillin. Evidence to support home  
16 care for severe pneumonia is poor [42].  
17  
18  
19

20  
21 The COVID pandemic has adversely affected recruitment in the study with disruption of field  
22 activities for many months in 2020. We anticipate prolongation of study duration in order to  
23 achieve sample size.  
24  
25  
26  
27  
28

### 29 **Ethics and Dissemination**

30  
31 This study has been approved by the Ethical Review Committee of The Aga Khan University  
32 (4722-Ped-ERC-17), Karachi, Pakistan in June 2017. Written informed consent in the local  
33 language will be obtained from parents or guardians of all participants. Data forms will contain  
34 no identifying information other than age, sex and GIS coordinates. Laboratory forms will  
35 contain no identifying information, specimens will be identified by a study number only and test  
36 results will not be linked to any individual by name. All survey staff will sign a confidentiality  
37 agreement to ensure that they do not release participant identities and test or study results to  
38 individuals who are not part of the study team.  
39  
40  
41  
42  
43  
44  
45  
46  
47

48 Study progress and findings will be shared with sponsors (BMGF) quarterly. Results will be  
49 presented at national and international research meetings and conferences and also prepared for  
50 publication in international peer-reviewed scientific journals. Study findings will be  
51 disseminated to the study communities.  
52  
53  
54  
55  
56  
57  
58  
59  
60

1  
2  
3 **Declarations:**  
4

5 **Consent for publication:** Yes  
6

7 **Availability of data and materials:** The datasets used for the article and the study is available  
8 from the corresponding author on request.  
9

10 **Competing interests:** The authors declare that they have no competing interests.  
11

12 **Funding:** The study is funded by Bill & Melinda Gates Foundation through Grant OPP1148892.  
13

14 **Author Contributions:** FM, ZM, MAH, SBS & ZAB: conceptualization of project. FM, AAN,  
15 and SC: development of study design and questionnaires. AAN and SC: oversight of data  
16 collection. AAN, SC and AH: support of study logistics and field activities. IA and AR:  
17 statistical analyses. SBS and ZAB: overall supervision and critical input. All authors have read  
18 and approved the final manuscript.  
19  
20  
21  
22

23 **Acknowledgements:** We would like to acknowledge the mothers and families who have  
24 contributed to the study. We are grateful to the Sindh LHW Program, Department of Health for  
25 their support and facilitation of the trial.  
26  
27  
28  
29  
30  
31  
32  
33  
34  
35  
36  
37  
38  
39  
40  
41  
42  
43  
44  
45  
46  
47  
48  
49  
50  
51  
52  
53  
54  
55  
56  
57  
58  
59  
60

## References

1. Liu, L., et al., *Global, regional, and national causes of child mortality: an updated systematic analysis for 2010 with time trends since 2000*. Lancet, 2012. **379**(9832): p. 2151-61.
2. Rudan, I., et al., *Epidemiology and etiology of childhood pneumonia*. Bull World Health Organ, 2008. **86**(5): p. 408-16.
3. *WHO/UNICEF Joint Statement: Management of Pneumonia in community settings*. 2002.
4. *Ending Preventable Child Deaths from Pneumonia and Diarrhoea by 2025: The integrated Global Action Plan for Pneumonia and Diarrhoea (GAPPD)*. 2013, World Health Organization: Geneva, Switzerland.
5. Soofi, S., et al., *Effectiveness of community case management of severe pneumonia with oral amoxicillin in children aged 2-59 months in Matiari district, rural Pakistan: a cluster-randomised controlled trial*. Lancet, 2012. **379**(9817): p. 729-37.
6. Kallander, K., D.H. Burgess, and S.A. Qazi, *Early identification and treatment of pneumonia: a call to action*. Lancet Glob Health, 2015. **4**(1): p. e12-3.
7. Owais, A., et al., *Why do families of sick newborns accept hospital care? A community-based cohort study in Karachi, Pakistan*. J Perinatol, 2011. **31**(9): p. 586-92.
8. Zaidi, A.K., et al., *Community-based treatment of serious bacterial infections in newborns and young infants: a randomized controlled trial assessing three antibiotic regimens*. Pediatr Infect Dis J, 2012. **31**(7): p. 667-72.
9. Ferdous, F., et al., *Mothers' perception and healthcare seeking behavior of pneumonia children in rural bangladesh*. ISRN Family Med, 2014: p. 690315.
10. Waiswa, P., et al., *Using the three delays model to understand why newborn babies die in eastern Uganda*. Trop Med Int Health, 2010. **15**(8): p. 964-72.
11. *LADY HEALTH WORKER PROGRAM FOR FAMILY PLANNING AND PRIMARY HEALTH CARE*. Available from: <https://www.sindhhealth.gov.pk/LHW-Program>.
12. Afsar, H., et al., *Factors affecting unsuccessful referral by the lady health workers in Karachi, Pakistan*. Journal-Pakistan Medical Association, 2003. **53**(11): p. 521-528.
13. Onyango, F.E., et al., *Hypoxaemia in young Kenyan children with acute lower respiratory infection*. BMJ, 1993. **306**(6878): p. 612-5.
14. Smyth, A., H. Carty, and C.A. Hart, *Clinical predictors of hypoxaemia in children with pneumonia*. Ann Trop Paediatr, 1998. **18**(1): p. 31-40.
15. Usen, S., et al., *Clinical predictors of hypoxaemia in Gambian children with acute lower respiratory tract infection: prospective cohort study*. BMJ, 1999. **318**(7176): p. 86-91.
16. McCollum, E.D., et al., *Multicenter study of hypoxemia prevalence and quality of oxygen treatment for hospitalized Malawian children*. Trans R Soc Trop Med Hyg, 2013. **107**(5): p. 285-92.
17. Basnet, S., R.K. Adhikari, and C.K. Gurung, *Hypoxemia in children with pneumonia and its clinical predictors*. Indian J Pediatr, 2006. **73**(9): p. 777-81.
18. Fu, L.Y., et al., *Brief hospitalization and pulse oximetry for predicting amoxicillin treatment failure in children with severe pneumonia*. Pediatrics, 2006. **118**(6): p. e1822-30.
19. Duke, T., et al., *Hypoxaemia in acute respiratory and non-respiratory illnesses in neonates and children in a developing country*. Arch Dis Child, 2002. **86**(2): p. 108-12.
20. Weber, M.W., et al., *Predictors of hypoxaemia in hospital admissions with acute lower respiratory tract infection in a developing country*. Arch Dis Child, 1997. **76**(4): p. 310-4.
21. Floyd, J., et al., *Evaluating the impact of pulse oximetry on childhood pneumonia mortality in resource-poor settings*. Nature, 2015. **528**(7580): p. S53-9.



- 1
- 2
- 3
- 4 22. Emdin, C.A., et al., *Utility and feasibility of integrating pulse oximetry into the routine*
- 5 *assessment of young infants at primary care clinics in Karachi, Pakistan: a cross-sectional study.*
- 6 *BMC Pediatr*, 2015. **15**: p. 141.
- 7
- 8 23. Funk, L.M., et al., *Global operating theatre distribution and pulse oximetry supply: an estimation*
- 9 *from reported data.* *The Lancet*, 2010. **376**(9746): p. 1055-1061.
- 10
- 11 24. Ingram, G. and N. Munro, *The use (or otherwise) of pulse oximetry in general practice.* 2005,
- 12 *British Journal of General Practice.*
- 13
- 14 25. Mokuolu, O.A. and O.A. Ajayi, *Use of an oxygen concentrator in a Nigerian neonatal unit:*
- 15 *economic implications and reliability.* *Ann Trop Paediatr*, 2002. **22**(3): p. 209-12.
- 16
- 17 26. Matai, S., et al., *Implementing an oxygen programme in hospitals in Papua New Guinea.* *Ann*
- 18 *Trop Paediatr*, 2008. **28**(1): p. 71-8.
- 19
- 20 27. Dobson, M., D. Peel, and N. Khallaf, *Field trial of oxygen concentrators in upper Egypt.* *Lancet*,
- 21 1996. **347**(9015): p. 1597-9.
- 22
- 23 28. Enarson, P., et al., *Implementation of an oxygen concentrator system in district hospital*
- 24 *paediatric wards throughout Malawi.* *Bull World Health Organ*, 2008. **86**(5): p. 344-8.
- 25
- 26 29. Hill, S.E., et al., *Oxygen for treatment of severe pneumonia in The Gambia, West Africa: a*
- 27 *situational analysis.* *Int J Tuberc Lung Dis*, 2009. **13**(5): p. 587-93.
- 28
- 29 30. Howie, S.R., et al., *Meeting oxygen needs in Africa: an options analysis from the Gambia.* *Bull*
- 30 *World Health Organ*, 2009. **87**(10): p. 763-71.
- 31
- 32 31. Pakistan, P.B.o.S.G.o. *PROVINCE WISE PROVISIONAL RESULTS OF CENSUS - 2017.* 2017; Available
- 33 from: [http://www.pbs.gov.pk/content/block-wise-provisional-summary-results-6th-population-](http://www.pbs.gov.pk/content/block-wise-provisional-summary-results-6th-population-housing-census-2017-january-03-2018)
- 34 [housing-census-2017-january-03-2018.](http://www.pbs.gov.pk/content/block-wise-provisional-summary-results-6th-population-housing-census-2017-january-03-2018)
- 35
- 36 32. Zhu, N., et al., *Lady health workers in Pakistan: improving access to health care for rural women*
- 37 *and families.* Boston: Harvard School of Public Health, 2014.
- 38
- 39 33. Organization, W.H., *Global health workforce alliance. Pakistan's lady health worker Programme:*
- 40 *Global Health workforce alliance.* World Health Organization, Case study. Geneva: World Health
- 41 Organization, 2008.
- 42
- 43 34. *Integrated Management of Childhood Illness (IMCI) (revised).* 2014, Geneva: World Health
- 44 Organization/The United Nation Children's Fund (UNICEF).
- 45
- 46 35. Duke, T., et al., *Improved oxygen systems for childhood pneumonia: a multihospital effectiveness*
- 47 *study in Papua New Guinea.* *The Lancet*, 2008. **372**(9646): p. 1328-1333.
- 48
- 49 36. Ferdous, F., et al., *Pneumonia mortality and healthcare utilization in young children in rural*
- 50 *Bangladesh: a prospective verbal autopsy study.* *Tropical medicine and health*, 2018. **46**(1): p. 1-
- 51 10.
- 52
- 53 37. Engel, M.S. and L.K. Kochilas, *Pulse oximetry screening: a review of diagnosing critical congenital*
- 54 *heart disease in newborns.* *Medical Devices (Auckland, NZ)*, 2016. **9**: p. 199.
- 55
- 56 38. Tekleab, A.M. and Y.C. Sewnet, *Role of pulse oximetry in detecting critical congenital heart*
- 57 *disease among newborns delivered at a high altitude setting in Ethiopia.* *Pediatric Health,*
- 58 *Medicine and Therapeutics*, 2019. **10**: p. 83.
- 59
- 60 39. Jawin, V., et al., *Beyond critical congenital heart disease: newborn screening using pulse*
- oximetry for neonatal sepsis and respiratory diseases in a middle-income country.* *PLoS One*,
2015. **10**(9): p. e0137580.
40. Latunji, O. and O. Akinyemi, *Factors influencing health-seeking behaviour among civil servants in*
- Ibadan, Nigeria.* *Annals of Ibadan postgraduate medicine*, 2018. **16**(1): p. 52-60.
41. Musoke, D., et al., *Health seeking behaviour and challenges in utilising health facilities in Wakiso*
- district, Uganda.* *African health sciences*, 2014. **14**(4): p. 1046-1055.



1  
2  
3  
4  
5  
6  
7  
8  
9  
10  
11  
12  
13  
14  
15  
16  
17  
18  
19  
20  
21  
22  
23  
24  
25  
26  
27  
28  
29  
30  
31  
32  
33  
34  
35  
36  
37  
38  
39  
40  
41  
42  
43  
44  
45  
46  
47  
48  
49  
50  
51  
52  
53  
54  
55  
56  
57  
58  
59  
60

42. Das, R.R. and M. Singh, *Treatment of severe community-acquired pneumonia with oral amoxicillin in under-five children in developing country: a systematic review*. PloS one, 2013. **8**(6): p. e66232.

For peer review only

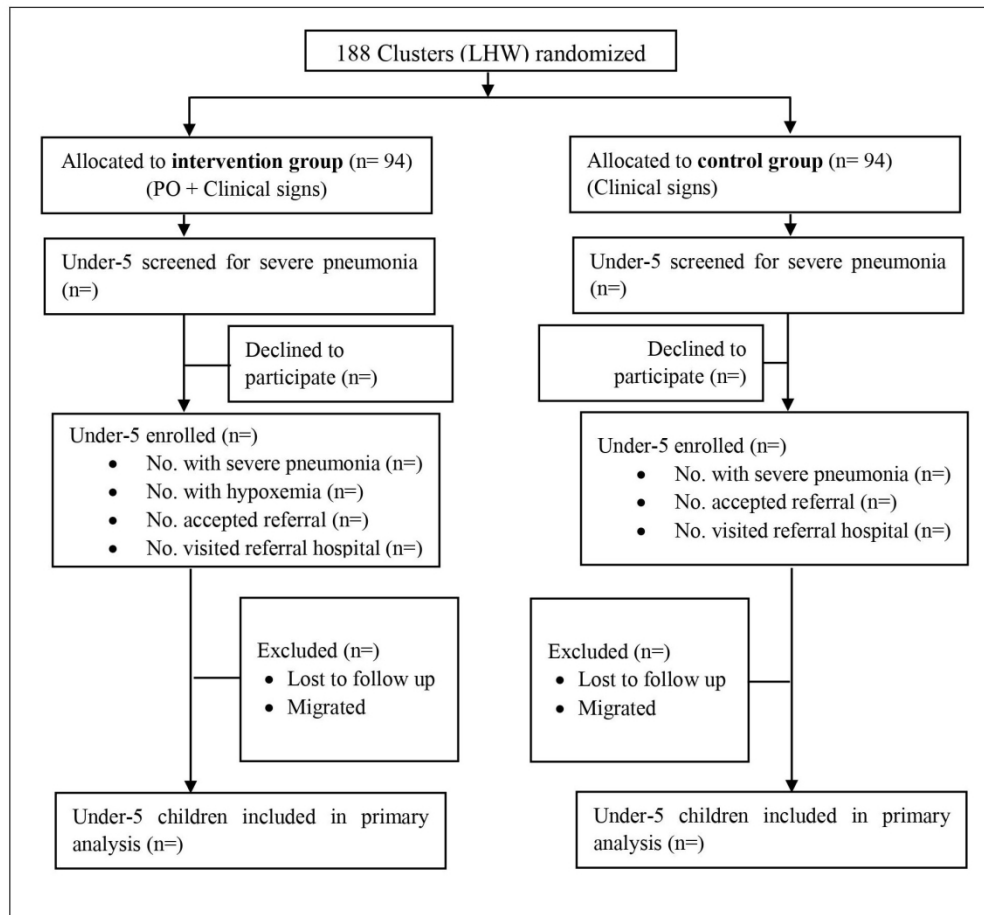

Trial Profile

514x481mm (96 x 96 DPI)

1  
2  
3  
4  
5  
6  
7  
8  
9  
10  
11  
12  
13  
14  
15  
16  
17  
18  
19  
20  
21  
22  
23  
24  
25  
26  
27  
28  
29  
30  
31  
32  
33  
34  
35  
36  
37  
38  
39  
40  
41  
42  
43  
44  
45  
46  
47  
48  
49  
50  
51  
52  
53  
54  
55  
56  
57  
58  
59  
60



Study Intervention and Control Sites

296x210mm (300 x 300 DPI)

## Appendix 1: Eligibility/Hospital Referral Criteria

| <b>Hospital Referral Criteria</b>                                                                                                                                                                                                                                                                                                                                                                                                                                                                                                                                                                                                                                                                                                                                                                                                                                                                                                                                                                                                                                          |                                                                                                                                                                                                                                                                                                                                                                                                                                                                                                                                                                                                                                                                                                                                                                                                                             |
|----------------------------------------------------------------------------------------------------------------------------------------------------------------------------------------------------------------------------------------------------------------------------------------------------------------------------------------------------------------------------------------------------------------------------------------------------------------------------------------------------------------------------------------------------------------------------------------------------------------------------------------------------------------------------------------------------------------------------------------------------------------------------------------------------------------------------------------------------------------------------------------------------------------------------------------------------------------------------------------------------------------------------------------------------------------------------|-----------------------------------------------------------------------------------------------------------------------------------------------------------------------------------------------------------------------------------------------------------------------------------------------------------------------------------------------------------------------------------------------------------------------------------------------------------------------------------------------------------------------------------------------------------------------------------------------------------------------------------------------------------------------------------------------------------------------------------------------------------------------------------------------------------------------------|
| <b>Intervention Group</b>                                                                                                                                                                                                                                                                                                                                                                                                                                                                                                                                                                                                                                                                                                                                                                                                                                                                                                                                                                                                                                                  | <b>Control Group</b>                                                                                                                                                                                                                                                                                                                                                                                                                                                                                                                                                                                                                                                                                                                                                                                                        |
| <p><b>Severe pneumonia AND/OR Hypoxemia</b></p> <p><b>Children of 0 – 6 days:</b></p> <ol style="list-style-type: none"> <li>1. 1. Fast Breathing (<math>\geq 60</math> breaths/min)</li> <li style="text-align: center;"><b>AND/OR</b></li> <li>2. <i>Hypoxemia (&lt;92 SpO2 Blood Oxygen Level)</i></li> </ol> <p><b>Children of 7 days – 59 months:</b></p> <ol style="list-style-type: none"> <li>1. Fast Breathing and/or Chest In-drawing           <ul style="list-style-type: none"> <li>➤ 0-2months: <math>\geq 60</math> breaths/min</li> <li>➤ 2-12months: <math>\geq 50</math> breaths/min</li> <li>➤ 12-59months <math>\geq 40</math> breaths/min</li> </ul> </li> <li style="text-align: center;"><b>AND</b></li> <li>2. Any ONE General Danger Sign* and/or Stridor           <ul style="list-style-type: none"> <li>➤ *Unable to drink/eat</li> <li>➤ Vomiting</li> <li>➤ Convulsions</li> <li>➤ Lethargy/Unconsciousness</li> </ul> </li> </ol> <p style="text-align: center;"><b>AND/OR</b></p> <p><b>Hypoxemia (&lt;92 SpO2 Blood Oxygen Level)</b></p> | <p><b>Severe pneumonia</b></p> <p><b>Children of 0 – 6 days:</b></p> <ol style="list-style-type: none"> <li>1. Fast Breathing (<math>\geq 60</math> breaths/min)</li> </ol> <p><b>Children of 7 days – 59 months:</b></p> <ol style="list-style-type: none"> <li>1. Fast Breathing and/or Chest In-drawing           <ul style="list-style-type: none"> <li>➤ 0-2months: <math>&gt; 60</math> breaths/min</li> <li>➤ 2-12months: <math>\geq 50</math> breaths/min</li> <li>➤ 12-59months <math>\geq 40</math> breaths/min</li> </ul> </li> <li style="text-align: center;"><b>AND</b></li> <li>2. Any ONE General Danger Sign* and/or Stridor           <ul style="list-style-type: none"> <li>➤ *Unable to drink/eat</li> <li>➤ Vomiting</li> <li>➤ Convulsions</li> <li>➤ Lethargy/Unconsciousness</li> </ul> </li> </ol> |

Appendix 2: Study Activities

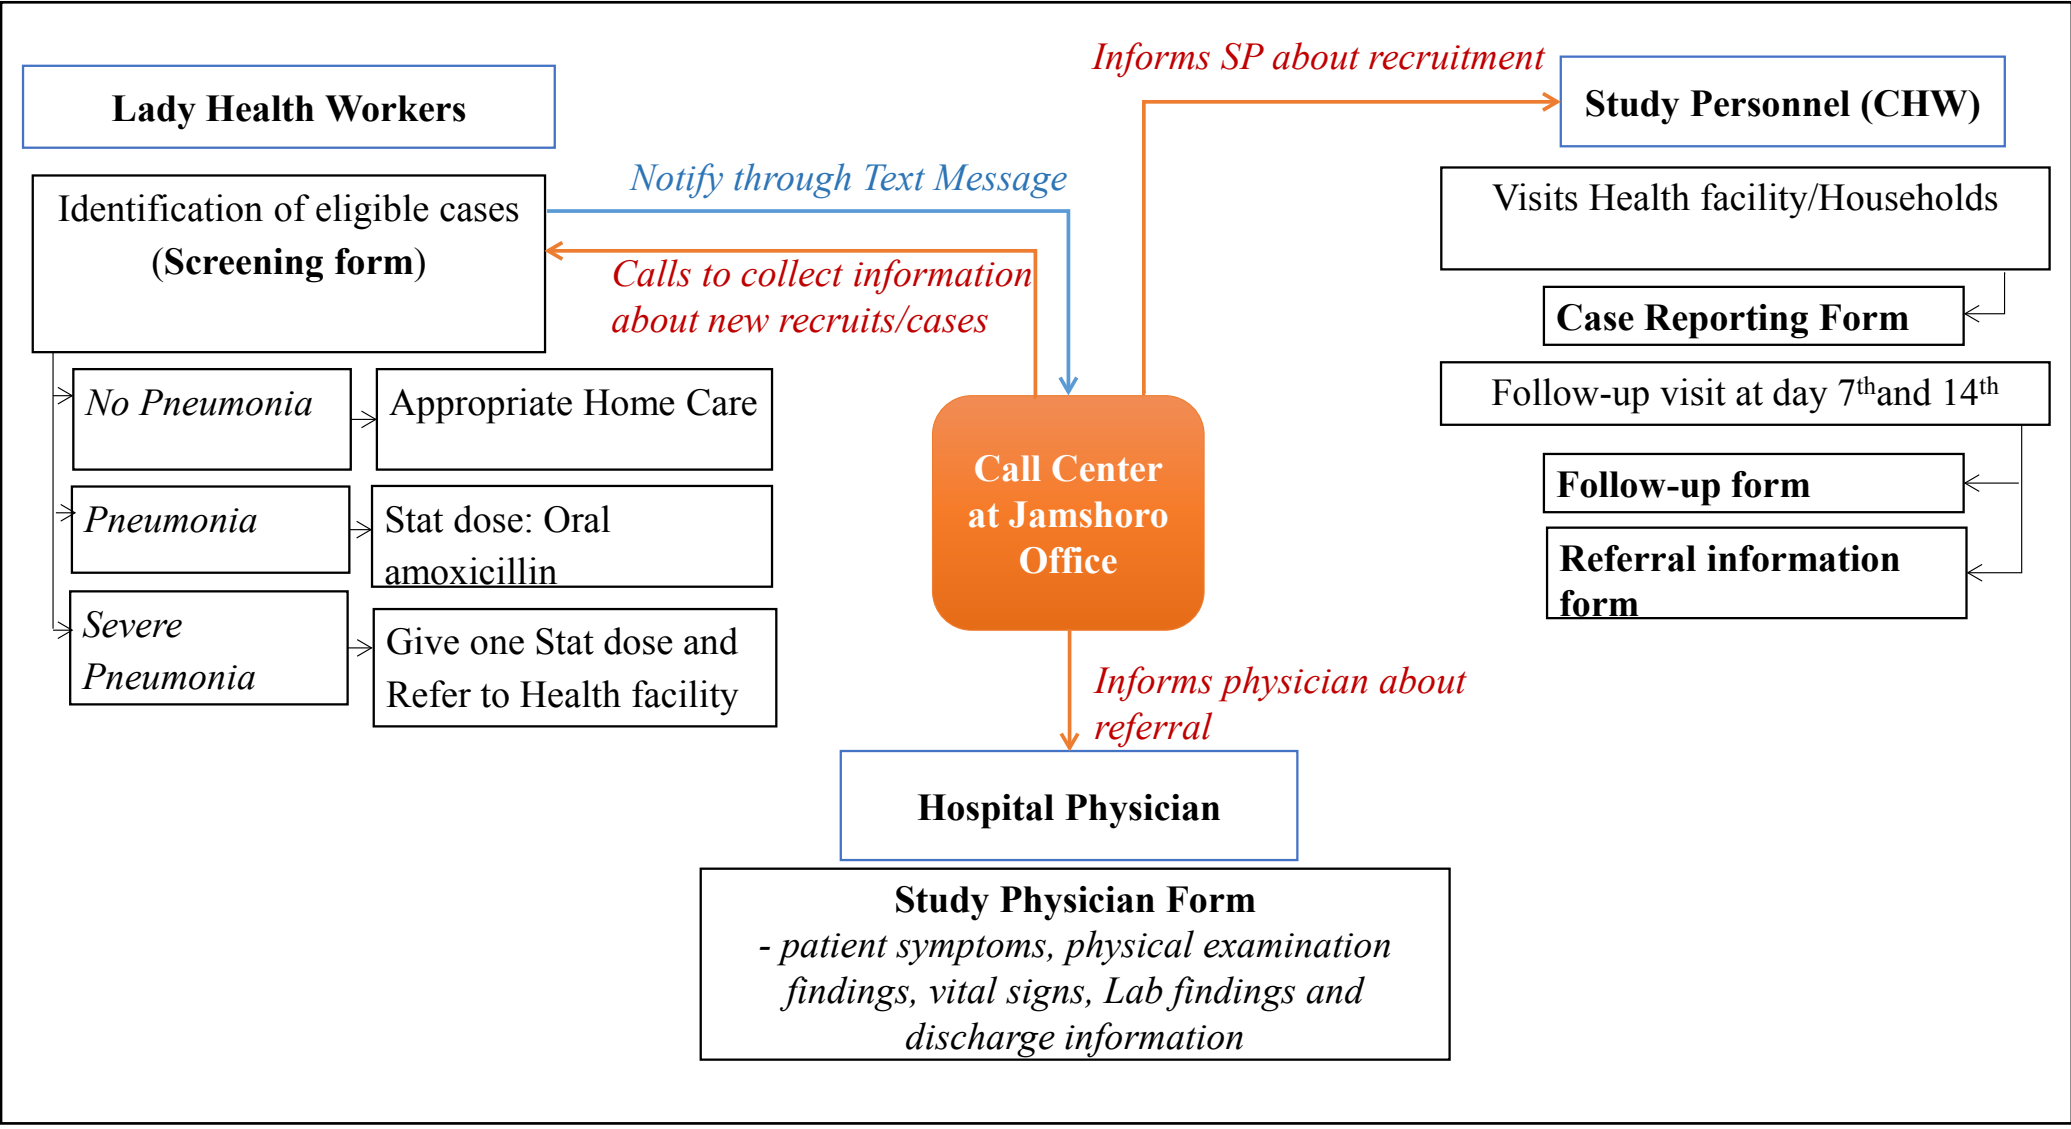

1  
2  
3 *Appendix 3: Informed Consent*  
4  
5

6 **Research Consent Form**  
7

8 **Title of Research Project:**  
9

10 **Impact of Pulse Oximetry on Hospital Referral Acceptance in children under 5 with severe pneumonia in**  
11 **rural Pakistan (District Jamshoro): a cluster randomized trial (GAPPD Scale up Project)**  
12  
13  
14

15  
16 **Investigators:**  
17

18 Dr. Fatima Mir (Principal investigator PO Project, AKU)  
19

20 Department of Pediatrics and Child Health, Aga Khan University, Karachi, Pakistan  
21

22 Tel: 92-21-34864955  
23  
24

25 Dr. Sajid Soofi (PI, Scale up of GAPPD in Pakistan)  
26

27 Centre of Excellence in Women & Child Health, The Aga Khan University, Pakistan.  
28

29 Tel: 92-21-34864955  
30  
31

32 Professor Zulfiqar Bhutta (Senior Investigator, Scale up of GAPPD in Pakistan)  
33

34 Centre of Excellence in Women & Child Health, The Aga Khan University, Pakistan.  
35

36 Tel: 92-21-34864955  
37  
38  
39

40 **Purpose of the Research:**  
41

42 Severe Pneumonia is a serious and possibly life threatening infection in young children aged under 5 years. It  
43 may involve fast breathing, chest indrawing, and danger signs like inability to feed, convulsions, persistent  
44 vomiting and decreased movement. Hypoxemia is now recognized as an additional sign of severe pneumonia  
45 needing hospital admission. Pulse oximetry (the 'oxygen test') is a simple method whereby lady health  
46 workers can check level of oxygen in blood of children and decide which young babies need immediate  
47 medical care and referral to hospital for antibiotics and oxygen and which babies can be treated in the health  
48 center itself.  
49

50 In this study, we are testing whether use of pulse oximetry in addition to other danger signs of severe  
51 pneumonia will influence families to accept hospital referral in comparison to areas where danger signs other  
52 than hypoxemia are used.  
53

54 This project is a collaboration between Aga Khan University (AKU) in Karachi and the Gates Foundation,  
55 Seattle, USA.  
56  
57  
58  
59  
60

### **Description of the Research:**

We are inviting children aged 0 to 59 months screened at home to join this research study. If your baby joins the study, the following activities will take place:

- 1) **Questionnaire.** We will ask several questions about the health of your baby, as well as check him/her for presence of pneumonia. If he/she has signs of severe pneumonia (with or without hypoxemia), he will be eligible to take part in our study.
- 2) **Pulse oximetry.** Next your child may or may not undergo a pulse oximetry measurement dependent on whether he resides in an intervention or non-intervention cluster. The process will be painless for the child and will involve placing a sensor on your baby's foot or hand. Each sensor is attached to a pulse oximetry machine. A number on the screen of the machine shows the oxygen level. A level including and above 92% will be regarded as normal.

All babies with fast breathing or chest in drawing pneumonia AND any one of general danger signs (inability to feed, persistent vomiting, decreased movement, convulsions) with or without hypoxemia (SaO<sub>2</sub> <92%) will be advised and helped to go to an assigned hospital for treatment (antibiotics and possibly oxygen supportive therapy). Their clinical status over there will be followed and transfer to hospital and subsequent treatment will be facilitated by the study.

All responses will be documented on paper forms. We will arrange for quick referral to hospital if your baby has low oxygen level or other signs of serious illness. Follow-up visits by our study staff will be conducted to check the status of your baby.

- 3) You may be asked detailed questions based on whether you accept or refuse hospital referral to allow us to understand what factors contributed to your decision making. Since this process will take time, we will do it after the child's treatment plan has been started at hospital or at home.
- 4) **Video recording.** Some infants will be video recorded during the study. The researchers will look at these videos to make quality checks on study conduct and procedures. You can refuse video recording but still join the rest of the study. If you provide permission, some videos may be shown publicly for education purposes, but your child's name will be kept private. The videos or images from them will not be shown or sold for financial profit.
- 5) **Stored information.** This study is connected to other studies coordinated by the Aga Khan University. If you agree to join this study, we will access information about your baby collected as part of the Aga Khan University demographic surveillance system and other Aga Khan University studies to which you have already allowed, or will allow, your baby to join.

We expect to enroll about 4160 children with severe pneumonia in this study.

### **Potential Harms, Discomforts or Inconveniences:**

There are no harms or discomforts that could be caused to your baby by taking part in this study.

### **Potential Benefits to individual participants:**

Your baby will receive free treatment at the hospital if referral is accepted. The baby will also receive two follow up visits to check if he/she is recovering as expected on day 7 and 14 as part of the study. If you refuse to accept hospital referral for injectable antibiotics and oxygen, we will provide less ideal oral treatment options at home.

### **Potential Benefits to Society:**

We may learn more about the usefulness of pulse oximetry for assessment of young babies in your community and other similar places.

**Confidentiality:**

We will respect your privacy. No information about you or your child will be given to anyone or be published without your permission, unless required by law. The paper forms, videos and electronic information made in this study will be stored in a secure, locked location. Only members of the research team will have access to them. BMGF (the sponsor) or AKU Clinical Research Monitors may look at your child's records to check on the study. By signing this consent form, you agree to let these people look at your child's records. We will put a copy of this research consent form in your child's patient health record and give you a copy as well. After the study has been completed, the forms and videos will be kept as long as required by BMGF and AKU policies. They will then be destroyed according to these same policies. Paper and electronic forms from this study will be stored for at least 7 years after publication of the study. Published study results will not reveal your identity or the identity of your baby.

**Payment**

No payment will be given for participation in this study.

**Participation:**

You decide if your child joins this study. If you choose to let your child take part, you can take your child out of the study at any time.

In the unlikely situation that your child becomes ill or is harmed because of study participation, we will treat your child for free. Your signing this consent form does not interfere with your legal rights in any way. The staff of the study, any people who gave money for the study, or the hospital are still responsible, legally and professionally, for what they do during this study.

**Sponsorship:**

The funder of this research is the Bill and Melinda Gates Foundation Seattle, USA.

**Conflicts of interest:**

None of the researchers have any conflicts of interest to declare.

**Consent:**

By signing this form, you agree that:

- 1) The study has been explained to you.
- 2) All of your questions have been answered.
- 3) The possible harms and benefits of this study have been explained to you.
- 4) You may ask questions about the study now and in the future.
- 5) You have been told that your child's medical records will be kept private except as described to you.
- 6) You understand that information about your child will not be given to anyone or be published without first asking your permission.

I agree that my child \_\_\_\_\_ may take part in this study.

I understand that videos may be used to assess the success of pulse oximetry. I understand that I may refuse to permit video-recording of my child, yet take part in other aspects of the study. I understand that even if I permit video-recording now, I may refuse the use of these videos at a later time. I understand that I may permit video-recording of my child for researchers to view, but refuse any public display of the videos.



1  
2  
3  
4  
5 I agree to permit my child and me to be video-recorded during this study.  
6  
7

8  YES  NO  
9

10  
11 I agree to permit whole or parts of videos of my child and me to be shown publicly for educational purposes.  
12

13  YES  NO  
14  
15  
16

17 \_\_\_\_\_  
18  
19 Printed Name of Parent/Legal Guardian  
20 date

\_\_\_\_\_

Parent/Legal Guardian's signature/Thumb print &

21  
22  
23  
24  
25  
26 \_\_\_\_\_  
27 Printed Name of person who explained consent

\_\_\_\_\_

Signature of Person who explained consent & date

28  
29  
30  
31 \_\_\_\_\_  
32 Printed Witness' name

\_\_\_\_\_

Witness' signature & date

33  
34 (If the parent/legal guardian does not read Sindhi)  
35  
36  
37  
38  
39

40 If you have any questions about this study, please call Dr Fatima Mir at \_\_\_\_\_  
41  
42

43 If you have questions about your child's rights as a subject in a study or injuries during a study, please call  
44 Coordinator, Bioethics Unit at \_\_\_\_\_  
45  
46  
47  
48  
49  
50  
51  
52  
53  
54  
55  
56  
57  
58  
59  
60

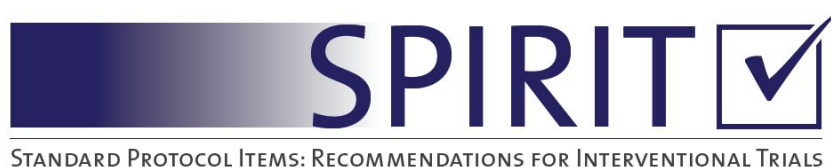

SPIRIT 2013 Checklist: Recommended items to address in a clinical trial protocol and related documents\*

| Section/item                      | Item No | Description                                                                                                                                                                                                                                                                              | Page numbers:          |
|-----------------------------------|---------|------------------------------------------------------------------------------------------------------------------------------------------------------------------------------------------------------------------------------------------------------------------------------------------|------------------------|
| <b>Administrative information</b> |         |                                                                                                                                                                                                                                                                                          |                        |
| Title                             | 1       | Descriptive title identifying the study design, population, interventions, and, if applicable, trial acronym                                                                                                                                                                             | Title page             |
| Trial registration                | 2a      | Trial identifier and registry name. If not yet registered, name of intended registry                                                                                                                                                                                                     | Page 1                 |
|                                   | 2b      | All items from the World Health Organization Trial Registration Data Set                                                                                                                                                                                                                 | Page 1                 |
| Protocol version                  | 3       | Date and version identifier                                                                                                                                                                                                                                                              |                        |
| Funding                           | 4       | Sources and types of financial, material, and other support                                                                                                                                                                                                                              | Page 14                |
| Roles and responsibilities        | 5a      | Names, affiliations, and roles of protocol contributors                                                                                                                                                                                                                                  | Title page and page 14 |
|                                   | 5b      | Name and contact information for the trial sponsor                                                                                                                                                                                                                                       |                        |
|                                   | 5c      | Role of study sponsor and funders, if any, in study design; collection, management, analysis, and interpretation of data; writing of the report; and the decision to submit the report for publication, including whether they will have ultimate authority over any of these activities |                        |
|                                   | 5d      | Composition, roles, and responsibilities of the coordinating centre, steering committee, endpoint adjudication committee, data management team, and other individuals or groups overseeing the trial, if applicable (see Item 21a for data monitoring committee)                         |                        |

**Introduction**

|    |                                                           |     |                                                        |                |
|----|-----------------------------------------------------------|-----|--------------------------------------------------------|----------------|
| 1  |                                                           |     |                                                        |                |
| 2  | Background and                                            | 6a  | Description of research question and justification     | Pages 3 - 5    |
| 3  | rationale                                                 |     | for undertaking the trial, including summary of        |                |
| 4  |                                                           |     | relevant studies (published and unpublished)           |                |
| 5  |                                                           |     | examining benefits and harms for each                  |                |
| 6  |                                                           |     | intervention                                           |                |
| 7  |                                                           |     |                                                        |                |
| 8  |                                                           | 6b  | Explanation for choice of comparators                  | Page 4         |
| 9  |                                                           |     |                                                        |                |
| 10 | Objectives                                                | 7   | Specific objectives or hypotheses                      | Page 5         |
| 11 |                                                           |     |                                                        |                |
| 12 | Trial design                                              | 8   | Description of trial design including type of trial    | Page 5         |
| 13 |                                                           |     | (eg, parallel group, crossover, factorial, single      |                |
| 14 |                                                           |     | group), allocation ratio, and framework (eg,           |                |
| 15 |                                                           |     | superiority, equivalence, noninferiority,              |                |
| 16 |                                                           |     | exploratory)                                           |                |
| 17 |                                                           |     |                                                        |                |
| 18 |                                                           |     |                                                        |                |
| 19 |                                                           |     |                                                        |                |
| 20 | <b>Methods: Participants, interventions, and outcomes</b> |     |                                                        |                |
| 21 |                                                           |     |                                                        |                |
| 22 | Study setting                                             | 9   | Description of study settings (eg, community           | Page 6         |
| 23 |                                                           |     | clinic, academic hospital) and list of countries       |                |
| 24 |                                                           |     | where data will be collected. Reference to where       |                |
| 25 |                                                           |     | list of study sites can be obtained                    |                |
| 26 |                                                           |     |                                                        |                |
| 27 | Eligibility criteria                                      | 10  | Inclusion and exclusion criteria for participants. If  | Page 6         |
| 28 |                                                           |     | applicable, eligibility criteria for study centres and |                |
| 29 |                                                           |     | individuals who will perform the interventions (eg,    |                |
| 30 |                                                           |     | surgeons, psychotherapists)                            |                |
| 31 |                                                           |     |                                                        |                |
| 32 |                                                           |     |                                                        |                |
| 33 | Interventions                                             | 11a | Interventions for each group with sufficient detail    | Pages 7 - 9    |
| 34 |                                                           |     | to allow replication, including how and when they      |                |
| 35 |                                                           |     | will be administered                                   |                |
| 36 |                                                           |     |                                                        |                |
| 37 |                                                           | 11b | Criteria for discontinuing or modifying allocated      | Not applicable |
| 38 |                                                           |     | interventions for a given trial participant (eg, drug  |                |
| 39 |                                                           |     | dose change in response to harms, participant          |                |
| 40 |                                                           |     | request, or improving/worsening disease)               |                |
| 41 |                                                           |     |                                                        |                |
| 42 |                                                           |     |                                                        |                |
| 43 |                                                           | 11c | Strategies to improve adherence to intervention        | Not applicable |
| 44 |                                                           |     | protocols, and any procedures for monitoring           |                |
| 45 |                                                           |     | adherence (eg, drug tablet return, laboratory          |                |
| 46 |                                                           |     | tests)                                                 |                |
| 47 |                                                           |     |                                                        |                |
| 48 |                                                           | 11d | Relevant concomitant care and interventions that       |                |
| 49 |                                                           |     | are permitted or prohibited during the trial           |                |
| 50 |                                                           |     |                                                        |                |
| 51 |                                                           |     |                                                        |                |
| 52 |                                                           |     |                                                        |                |
| 53 |                                                           |     |                                                        |                |
| 54 |                                                           |     |                                                        |                |
| 55 |                                                           |     |                                                        |                |
| 56 |                                                           |     |                                                        |                |
| 57 |                                                           |     |                                                        |                |
| 58 |                                                           |     |                                                        |                |
| 59 |                                                           |     |                                                        |                |
| 60 |                                                           |     |                                                        |                |

|    |                      |    |                                                                                                                                                                                                                                                                                                                                                                                |             |
|----|----------------------|----|--------------------------------------------------------------------------------------------------------------------------------------------------------------------------------------------------------------------------------------------------------------------------------------------------------------------------------------------------------------------------------|-------------|
| 1  |                      |    |                                                                                                                                                                                                                                                                                                                                                                                |             |
| 2  | Outcomes             | 12 | Primary, secondary, and other outcomes, including the specific measurement variable (eg, systolic blood pressure), analysis metric (eg, change from baseline, final value, time to event), method of aggregation (eg, median, proportion), and time point for each outcome. Explanation of the clinical relevance of chosen efficacy and harm outcomes is strongly recommended | Pages 5-6   |
| 3  |                      |    |                                                                                                                                                                                                                                                                                                                                                                                |             |
| 4  |                      |    |                                                                                                                                                                                                                                                                                                                                                                                |             |
| 5  |                      |    |                                                                                                                                                                                                                                                                                                                                                                                |             |
| 6  |                      |    |                                                                                                                                                                                                                                                                                                                                                                                |             |
| 7  |                      |    |                                                                                                                                                                                                                                                                                                                                                                                |             |
| 8  |                      |    |                                                                                                                                                                                                                                                                                                                                                                                |             |
| 9  |                      |    |                                                                                                                                                                                                                                                                                                                                                                                |             |
| 10 |                      |    |                                                                                                                                                                                                                                                                                                                                                                                |             |
| 11 |                      |    |                                                                                                                                                                                                                                                                                                                                                                                |             |
| 12 | Participant timeline | 13 | Time schedule of enrolment, interventions (including any run-ins and washouts), assessments, and visits for participants. A schematic diagram is highly recommended (see Figure)                                                                                                                                                                                               | Page 6      |
| 13 |                      |    |                                                                                                                                                                                                                                                                                                                                                                                |             |
| 14 |                      |    |                                                                                                                                                                                                                                                                                                                                                                                |             |
| 15 |                      |    |                                                                                                                                                                                                                                                                                                                                                                                |             |
| 16 |                      |    |                                                                                                                                                                                                                                                                                                                                                                                |             |
| 17 |                      |    |                                                                                                                                                                                                                                                                                                                                                                                |             |
| 18 |                      |    |                                                                                                                                                                                                                                                                                                                                                                                |             |
| 19 | Sample size          | 14 | Estimated number of participants needed to achieve study objectives and how it was determined, including clinical and statistical assumptions supporting any sample size calculations                                                                                                                                                                                          | Page 12     |
| 20 |                      |    |                                                                                                                                                                                                                                                                                                                                                                                |             |
| 21 |                      |    |                                                                                                                                                                                                                                                                                                                                                                                |             |
| 22 |                      |    |                                                                                                                                                                                                                                                                                                                                                                                |             |
| 23 |                      |    |                                                                                                                                                                                                                                                                                                                                                                                |             |
| 24 |                      |    |                                                                                                                                                                                                                                                                                                                                                                                |             |
| 25 |                      |    |                                                                                                                                                                                                                                                                                                                                                                                |             |
| 26 | Recruitment          | 15 | Strategies for achieving adequate participant enrolment to reach target sample size                                                                                                                                                                                                                                                                                            | Pages 7 - 9 |
| 27 |                      |    |                                                                                                                                                                                                                                                                                                                                                                                |             |
| 28 |                      |    |                                                                                                                                                                                                                                                                                                                                                                                |             |

### Methods: Assignment of interventions (for controlled trials)

#### Allocation:

|    |                                  |     |                                                                                                                                                                                                                                                                                                                                                          |             |
|----|----------------------------------|-----|----------------------------------------------------------------------------------------------------------------------------------------------------------------------------------------------------------------------------------------------------------------------------------------------------------------------------------------------------------|-------------|
| 31 |                                  |     |                                                                                                                                                                                                                                                                                                                                                          |             |
| 32 |                                  |     |                                                                                                                                                                                                                                                                                                                                                          |             |
| 33 | Sequence generation              | 16a | Method of generating the allocation sequence (eg, computer-generated random numbers), and list of any factors for stratification. To reduce predictability of a random sequence, details of any planned restriction (eg, blocking) should be provided in a separate document that is unavailable to those who enrol participants or assign interventions | Pages 6 - 7 |
| 34 |                                  |     |                                                                                                                                                                                                                                                                                                                                                          |             |
| 35 |                                  |     |                                                                                                                                                                                                                                                                                                                                                          |             |
| 36 |                                  |     |                                                                                                                                                                                                                                                                                                                                                          |             |
| 37 |                                  |     |                                                                                                                                                                                                                                                                                                                                                          |             |
| 38 |                                  |     |                                                                                                                                                                                                                                                                                                                                                          |             |
| 39 |                                  |     |                                                                                                                                                                                                                                                                                                                                                          |             |
| 40 |                                  |     |                                                                                                                                                                                                                                                                                                                                                          |             |
| 41 |                                  |     |                                                                                                                                                                                                                                                                                                                                                          |             |
| 42 |                                  |     |                                                                                                                                                                                                                                                                                                                                                          |             |
| 43 |                                  |     |                                                                                                                                                                                                                                                                                                                                                          |             |
| 44 | Allocation concealment mechanism | 16b | Mechanism of implementing the allocation sequence (eg, central telephone; sequentially numbered, opaque, sealed envelopes), describing any steps to conceal the sequence until interventions are assigned                                                                                                                                                | Pages 6 - 7 |
| 45 |                                  |     |                                                                                                                                                                                                                                                                                                                                                          |             |
| 46 |                                  |     |                                                                                                                                                                                                                                                                                                                                                          |             |
| 47 |                                  |     |                                                                                                                                                                                                                                                                                                                                                          |             |
| 48 |                                  |     |                                                                                                                                                                                                                                                                                                                                                          |             |
| 49 |                                  |     |                                                                                                                                                                                                                                                                                                                                                          |             |
| 50 |                                  |     |                                                                                                                                                                                                                                                                                                                                                          |             |
| 51 | Implementation                   | 16c | Who will generate the allocation sequence, who will enrol participants, and who will assign participants to interventions                                                                                                                                                                                                                                | Pages 6 - 8 |
| 52 |                                  |     |                                                                                                                                                                                                                                                                                                                                                          |             |
| 53 |                                  |     |                                                                                                                                                                                                                                                                                                                                                          |             |
| 54 |                                  |     |                                                                                                                                                                                                                                                                                                                                                          |             |
| 55 |                                  |     |                                                                                                                                                                                                                                                                                                                                                          |             |
| 56 | Blinding (masking)               | 17a | Who will be blinded after assignment to interventions (eg, trial participants, care providers, outcome assessors, data analysts), and how                                                                                                                                                                                                                |             |
| 57 |                                  |     |                                                                                                                                                                                                                                                                                                                                                          |             |
| 58 |                                  |     |                                                                                                                                                                                                                                                                                                                                                          |             |
| 59 |                                  |     |                                                                                                                                                                                                                                                                                                                                                          |             |
| 60 |                                  |     |                                                                                                                                                                                                                                                                                                                                                          |             |

- 1  
2  
3  
4  
5  
6  
7
- 17b If blinded, circumstances under which unblinding is permissible, and procedure for revealing a participant's allocated intervention during the trial

8  
9  
10  
11  
12  
13  
14  
15  
16  
17  
18  
19

**Methods: Data collection, management, and analysis**

- 20  
21  
22  
23  
24  
25  
26  
27  
28  
29  
30  
31  
32  
33  
34  
35  
36  
37  
38  
39  
40  
41  
42  
43  
44  
45  
46  
47  
48
- |                         |     |                                                                                                                                                                                                                                                                                                                                                                                                              |         |
|-------------------------|-----|--------------------------------------------------------------------------------------------------------------------------------------------------------------------------------------------------------------------------------------------------------------------------------------------------------------------------------------------------------------------------------------------------------------|---------|
| Data collection methods | 18a | Plans for assessment and collection of outcome, baseline, and other trial data, including any related processes to promote data quality (eg, duplicate measurements, training of assessors) and a description of study instruments (eg, questionnaires, laboratory tests) along with their reliability and validity, if known. Reference to where data collection forms can be found, if not in the protocol | Page 9  |
|                         | 18b | Plans to promote participant retention and complete follow-up, including list of any outcome data to be collected for participants who discontinue or deviate from intervention protocols                                                                                                                                                                                                                    | Page 12 |
| Data management         | 19  | Plans for data entry, coding, security, and storage, including any related processes to promote data quality (eg, double data entry; range checks for data values). Reference to where details of data management procedures can be found, if not in the protocol                                                                                                                                            | Page 10 |
| Statistical methods     | 20a | Statistical methods for analysing primary and secondary outcomes. Reference to where other details of the statistical analysis plan can be found, if not in the protocol                                                                                                                                                                                                                                     | Page 12 |
|                         | 20b | Methods for any additional analyses (eg, subgroup and adjusted analyses)                                                                                                                                                                                                                                                                                                                                     | Page 12 |
|                         | 20c | Definition of analysis population relating to protocol non-adherence (eg, as randomised analysis), and any statistical methods to handle missing data (eg, multiple imputation)                                                                                                                                                                                                                              |         |

49  
50  
51  
52  
53  
54  
55  
56  
57  
58  
59  
60

**Methods: Monitoring**

- |                 |     |                                                                                                                                                                                                                                                                                                                                       |         |
|-----------------|-----|---------------------------------------------------------------------------------------------------------------------------------------------------------------------------------------------------------------------------------------------------------------------------------------------------------------------------------------|---------|
| Data monitoring | 21a | Composition of data monitoring committee (DMC); summary of its role and reporting structure; statement of whether it is independent from the sponsor and competing interests; and reference to where further details about its charter can be found, if not in the protocol. Alternatively, an explanation of why a DMC is not needed | Page 10 |
|-----------------|-----|---------------------------------------------------------------------------------------------------------------------------------------------------------------------------------------------------------------------------------------------------------------------------------------------------------------------------------------|---------|

|    |                                 |     |                                                        |
|----|---------------------------------|-----|--------------------------------------------------------|
| 1  |                                 |     |                                                        |
| 2  |                                 | 21b | Description of any interim analyses and stopping       |
| 3  |                                 |     | guidelines, including who will have access to          |
| 4  |                                 |     | these interim results and make the final decision      |
| 5  |                                 |     | to terminate the trial                                 |
| 6  |                                 |     |                                                        |
| 7  | Harms                           | 22  | Plans for collecting, assessing, reporting, and        |
| 8  |                                 |     | managing solicited and spontaneously reported          |
| 9  |                                 |     | adverse events and other unintended effects of         |
| 10 |                                 |     | trial interventions or trial conduct                   |
| 11 |                                 |     |                                                        |
| 12 |                                 |     |                                                        |
| 13 | Auditing                        | 23  | Frequency and procedures for auditing trial            |
| 14 |                                 |     | conduct, if any, and whether the process will be       |
| 15 |                                 |     | independent from investigators and the sponsor         |
| 16 |                                 |     |                                                        |
| 17 |                                 |     |                                                        |
| 18 | <b>Ethics and dissemination</b> |     |                                                        |
| 19 |                                 |     |                                                        |
| 20 | Research ethics                 | 24  | Plans for seeking research ethics                      |
| 21 | approval                        |     | committee/institutional review board (REC/IRB)         |
| 22 |                                 |     | approval                                               |
| 23 |                                 |     |                                                        |
| 24 | Protocol                        | 25  | Plans for communicating important protocol             |
| 25 | amendments                      |     | modifications (eg, changes to eligibility criteria,    |
| 26 |                                 |     | outcomes, analyses) to relevant parties (eg,           |
| 27 |                                 |     | investigators, REC/IRBs, trial participants, trial     |
| 28 |                                 |     | registries, journals, regulators)                      |
| 29 |                                 |     |                                                        |
| 30 |                                 |     |                                                        |
| 31 | Consent or assent               | 26a | Who will obtain informed consent or assent from        |
| 32 |                                 |     | potential trial participants or authorised             |
| 33 |                                 |     | surrogates, and how (see Item 32)                      |
| 34 |                                 |     |                                                        |
| 35 |                                 |     |                                                        |
| 36 |                                 | 26b | Additional consent provisions for collection and       |
| 37 |                                 |     | use of participant data and biological specimens       |
| 38 |                                 |     | in ancillary studies, if applicable                    |
| 39 |                                 |     |                                                        |
| 40 | Confidentiality                 | 27  | How personal information about potential and           |
| 41 |                                 |     | enrolled participants will be collected, shared, and   |
| 42 |                                 |     | maintained in order to protect confidentiality         |
| 43 |                                 |     | before, during, and after the trial                    |
| 44 |                                 |     |                                                        |
| 45 |                                 |     |                                                        |
| 46 | Declaration of                  | 28  | Financial and other competing interests for            |
| 47 | interests                       |     | principal investigators for the overall trial and      |
| 48 |                                 |     | each study site                                        |
| 49 |                                 |     |                                                        |
| 50 | Access to data                  | 29  | Statement of who will have access to the final trial   |
| 51 |                                 |     | dataset, and disclosure of contractual agreements      |
| 52 |                                 |     | that limit such access for investigators               |
| 53 |                                 |     |                                                        |
| 54 |                                 |     |                                                        |
| 55 | Ancillary and                   | 30  | Provisions, if any, for ancillary and post-trial care, |
| 56 | post-trial care                 |     | and for compensation to those who suffer harm          |
| 57 |                                 |     | from trial participation                               |
| 58 |                                 |     |                                                        |
| 59 |                                 |     |                                                        |
| 60 |                                 |     |                                                        |

|    |                   |     |                                                       |         |
|----|-------------------|-----|-------------------------------------------------------|---------|
| 1  |                   |     |                                                       |         |
| 2  | Dissemination     | 31a | Plans for investigators and sponsor to                | Page 14 |
| 3  | policy            |     | communicate trial results to participants,            |         |
| 4  |                   |     | healthcare professionals, the public, and other       |         |
| 5  |                   |     | relevant groups (eg, via publication, reporting in    |         |
| 6  |                   |     | results databases, or other data sharing              |         |
| 7  |                   |     | arrangements), including any publication              |         |
| 8  |                   |     | restrictions                                          |         |
| 9  |                   |     |                                                       |         |
| 10 |                   |     |                                                       |         |
| 11 |                   | 31b | Authorship eligibility guidelines and any intended    | Page 14 |
| 12 |                   |     | use of professional writers                           |         |
| 13 |                   |     |                                                       |         |
| 14 |                   | 31c | Plans, if any, for granting public access to the full |         |
| 15 |                   |     | protocol, participant-level dataset, and statistical  |         |
| 16 |                   |     | code                                                  |         |
| 17 |                   |     |                                                       |         |
| 18 |                   |     |                                                       |         |
| 19 | <b>Appendices</b> |     |                                                       |         |
| 20 |                   |     |                                                       |         |
| 21 | Informed consent  | 32  | Model consent form and other related                  |         |
| 22 | materials         |     | documentation given to participants and               |         |
| 23 |                   |     | authorised surrogates                                 |         |
| 24 |                   |     |                                                       |         |
| 25 |                   |     |                                                       |         |
| 26 | Biological        | 33  | Plans for collection, laboratory evaluation, and      |         |
| 27 | specimens         |     | storage of biological specimens for genetic or        |         |
| 28 |                   |     | molecular analysis in the current trial and for       |         |
| 29 |                   |     | future use in ancillary studies, if applicable        |         |
| 30 |                   |     |                                                       |         |

---

\*It is strongly recommended that this checklist be read in conjunction with the SPIRIT 2013 Explanation & Elaboration for important clarification on the items. Amendments to the protocol should be tracked and dated. The SPIRIT checklist is copyrighted by the SPIRIT Group under the Creative Commons "[Attribution-NonCommercial-NoDerivs 3.0 Unported](https://creativecommons.org/licenses/by-nc-nd/3.0/)" license.

# BMJ Open

## Impact of Pulse Oximetry on Hospital Referral Acceptance in Children under 5 with Severe Pneumonia in Rural Pakistan (District Jamshoro): Protocol for a Cluster Randomized Trial

|                                 |                                                                                                                                                                                                                                                                                                                                                                                                                                                                                                                                                                                                                                                                                                                                             |
|---------------------------------|---------------------------------------------------------------------------------------------------------------------------------------------------------------------------------------------------------------------------------------------------------------------------------------------------------------------------------------------------------------------------------------------------------------------------------------------------------------------------------------------------------------------------------------------------------------------------------------------------------------------------------------------------------------------------------------------------------------------------------------------|
| Journal:                        | <i>BMJ Open</i>                                                                                                                                                                                                                                                                                                                                                                                                                                                                                                                                                                                                                                                                                                                             |
| Manuscript ID                   | bmjopen-2020-046158.R2                                                                                                                                                                                                                                                                                                                                                                                                                                                                                                                                                                                                                                                                                                                      |
| Article Type:                   | Protocol                                                                                                                                                                                                                                                                                                                                                                                                                                                                                                                                                                                                                                                                                                                                    |
| Date Submitted by the Author:   | 03-Aug-2021                                                                                                                                                                                                                                                                                                                                                                                                                                                                                                                                                                                                                                                                                                                                 |
| Complete List of Authors:       | Mir, Fatima; Aga Khan University, Pediatrics and Child Health; Aga Khan University, Aga Khan University<br>Ali Nathwani, Apsara; Aga Khan University, chandar, suhail; Aga Khan University, Paediatrics and child health<br>Hussain, Amjad; Aga Khan University, Pediatrics and Child Health<br>Rizvi, Arjumand; Aga Khan Medical University, Pediatrics and Child Health<br>Ahmed, Imran; Aga Khan University<br>Memon, Zahid Ali; Aga Khan University, Centre of Excellence in Women and Child Health<br>Habib, Atif; Aga Khan University, Department of Paediatrics & Child Health<br>Soofi, Sajid; Aga Khan University Hospital, Paediatric & Child Health<br>Bhutta, Zulfiqar; Aga Khan University, Division of Women and Child Health |
| <b>Primary Subject Heading</b>: | Global health                                                                                                                                                                                                                                                                                                                                                                                                                                                                                                                                                                                                                                                                                                                               |
| Secondary Subject Heading:      | Health services research, Infectious diseases, Paediatrics, Public health                                                                                                                                                                                                                                                                                                                                                                                                                                                                                                                                                                                                                                                                   |
| Keywords:                       | Public health < INFECTIOUS DISEASES, Paediatric infectious disease & immunisation < PAEDIATRICS, PUBLIC HEALTH, RESPIRATORY MEDICINE (see Thoracic Medicine), Clinical trials < THERAPEUTICS                                                                                                                                                                                                                                                                                                                                                                                                                                                                                                                                                |
|                                 |                                                                                                                                                                                                                                                                                                                                                                                                                                                                                                                                                                                                                                                                                                                                             |

SCHOLARONE™  
Manuscripts





I, the Submitting Author has the right to grant and does grant on behalf of all authors of the Work (as defined in the below author licence), an exclusive licence and/or a non-exclusive licence for contributions from authors who are: i) UK Crown employees; ii) where BMJ has agreed a CC-BY licence shall apply, and/or iii) in accordance with the terms applicable for US Federal Government officers or employees acting as part of their official duties; on a worldwide, perpetual, irrevocable, royalty-free basis to BMJ Publishing Group Ltd ("BMJ") its licensees and where the relevant Journal is co-owned by BMJ to the co-owners of the Journal, to publish the Work in this journal and any other BMJ products and to exploit all rights, as set out in our [licence](#).

The Submitting Author accepts and understands that any supply made under these terms is made by BMJ to the Submitting Author unless you are acting as an employee on behalf of your employer or a postgraduate student of an affiliated institution which is paying any applicable article publishing charge ("APC") for Open Access articles. Where the Submitting Author wishes to make the Work available on an Open Access basis (and intends to pay the relevant APC), the terms of reuse of such Open Access shall be governed by a Creative Commons licence – details of these licences and which [Creative Commons](#) licence will apply to this Work are set out in our licence referred to above.

Other than as permitted in any relevant BMJ Author's Self Archiving Policies, I confirm this Work has not been accepted for publication elsewhere, is not being considered for publication elsewhere and does not duplicate material already published. I confirm all authors consent to publication of this Work and authorise the granting of this licence.

1  
2  
3  
4  
5 **Impact of Pulse Oximetry on Hospital Referral Acceptance in Children under 5 with**  
6 **Severe Pneumonia in Rural Pakistan (District Jamshoro): Protocol for a Cluster**  
7 **Randomized Trial**  
8  
9

10  
11 **Fatima Mir<sup>1\*</sup>, Apsara Ali Nathwani<sup>2</sup>, Suhail Chanar<sup>2</sup>, Amjad Hussain<sup>2</sup>, Arjumand Rizvi<sup>2</sup>,**  
12 **Imran Ahmed<sup>2</sup>, Zahid Memon<sup>2</sup>, Muhammad Atif Habib<sup>2</sup>, Sajid Soofi<sup>1,2</sup>, Zulfiqar A Bhutta<sup>2</sup>**  
13  
14

15  
16 **Affiliations**  
17

18  
19 <sup>1</sup>Department of Pediatrics and Child Health, The Aga Khan University, Pakistan  
20

21 <sup>2</sup>Centre of Excellence in Women & Child Health, The Aga Khan University, Pakistan.  
22  
23  
24  
25  
26  
27  
28  
29

30 **\*Corresponding author**  
31

32 Dr. Fatima Mir

33 Associate Professor

34 Department of Pediatrics and Child Health, the Aga Khan University

35 Stadium Road, Karachi 74800

36 Pakistan

37 Email: [fatima.mir@aku.edu](mailto:fatima.mir@aku.edu)

38 Phone: +92 3005844610  
39  
40  
41  
42  
43  
44  
45

46 **Key words:** Severe pneumonia, hypoxemia, pulse-oximetry, Lady Health Workers (LHWs),  
47 community case management pneumonia, hospital referral.  
48  
49  
50  
51  
52  
53  
54  
55  
56  
57  
58  
59  
60

## 1 Abstract

2 **Background:** Pneumonia is a leading cause of death among children under five specifically in  
3 South Asia and Sub-Saharan Africa. Hypoxemia is a life-threatening complication among children  
4 under five with pneumonia. Hypoxemia increases risk of mortality by 4.3 times in children with  
5 pneumonia than those without hypoxemia. Prevalence of hypoxemia varies with geography,  
6 altitude and severity (9-39% Asia, 3-10% African countries). In this protocol paper we describe  
7 research methods for assessing impact of lady health workers identifying hypoxemia in children  
8 with signs of pneumonia during household visits on acceptance of hospital referral in District  
9 Jamshoro, Sindh.

10 **Methods and Analysis:** A cluster randomized controlled trial using pulse oximetry as intervention  
11 for children with severe pneumonia will be conducted in community settings. Children aged 0-59  
12 months with signs of severe pneumonia will be recruited by Lady Health Workers (LHWs) during  
13 routine visits in both intervention and control arms after consent. Severe pneumonia will be defined  
14 as fast breathing and/or chest in-drawing, and, one or more danger sign and/or hypoxemia  
15 ( $SaO_2 < 92\%$ ) in PO (intervention) group and fast breathing and/or chest in-drawing and 1/more  
16 danger sign in clinical signs (control) group. Recruits in both groups will receive a stat dose of oral  
17 amoxicillin and referral to designated tertiary health facility. Analysis of variance will be used to  
18 compare baseline referral acceptance in both groups with that at end of study.

19 **Ethics and Dissemination:** Ethical approval was granted by the Ethics Review Committee of the  
20 Aga Khan University (4722-Ped-ERC-17), Karachi. Study results will be shared with relevant  
21 government and non-governmental organizations, presented at national and international research  
22 conferences and published in international peer-reviewed scientific journals.

23 **Trial registration:** Clinicaltrials.gov Registry NCT03588377. Trial registration Date: May 05,  
24 2018. Last update Date: July 26, 2021. Study Status: ongoing

## 25 Article Summary

### 26 Strengths and Limitations of this study

- 27 • Our study will directly assess impact of pulse oximetry on family referral acceptance by  
28 comparing family acceptance of hospital referral (verbal acceptance with hospital visit) in  
29 'pulse oximetry and clinical signs' group with 'clinical signs alone' group

- 1  
2  
3 30 • The study has applicability because it assesses impact with ‘real-life’ limitations  
4  
5 31 (variability in lady health worker accuracy in identifying severe pneumonia, availability of  
6  
7 32 oxygen and human resource at referral hospital and, availability of private transportation)  
8  
9 33 • The study design provides means of minimizing the effect of confounding  
10  
11 34 • The study design avoids bias in allocation to exposure groups  
12  
13 35 • Blinding is not possible due to nature of intervention  
14  
15 36 • Some subjects may fail to adhere to protocol and non-adherence may cause an  
16  
17 37 underestimated measure of association.  
18  
19 38  
20 39  
21  
22  
23  
24  
25  
26  
27  
28  
29  
30  
31  
32  
33  
34  
35  
36  
37  
38  
39  
40  
41  
42  
43  
44  
45  
46  
47  
48  
49  
50  
51  
52  
53  
54  
55  
56  
57  
58  
59  
60

## 40 Introduction

41 Pneumonia accounts for an estimated 18% of under-5 mortality across the globe [1] Majority of  
42 these pneumonia-specific deaths occur in 15 countries, in which Pakistan ranks fifth. [2] Failure  
43 to seek early care and delays in hospital referral are commonly acknowledged determinants of  
44 mortality in childhood pneumonia with a higher proportion reported from rural settings than urban.  
45 [3-6] Acceptance rates of 'facilitated' hospital referral advice have been reported low between 8%  
46 and 23% for sick young infants in peri-urban Karachi. [7, 8] They are even lower for non-facilitated  
47 referral in rural settings in children under 5 with severe pneumonia in rural Matiari district, Sindh.  
48 [5] The prominent reasons in developing countries behind this delay are inability to recognize  
49 seriousness of pneumonia, distance from health facility and lack of money for private health care.  
50 [9, 10]

51 In 1994, the Government of Pakistan introduced the Lady Health Worker (LHW) Program in rural  
52 populations with low physician density to address common health problems in women and children  
53 under 5 through household visits. To date, a team of over 110,000 LHWs are working for the  
54 program nationwide with 23,185 LHWs in Sindh alone [11]. Each LHW is responsible for a  
55 population of 1000–1500 individuals (catchment of about 100 families). Recruits are preferably  
56 local, with a minimum of 8 years of formal schooling followed by 15 months of training to deliver  
57 maternal and child health (MCH) care in community settings. During a monthly home visit, the  
58 LHW provide essential maternal and child health care services including family planning needs,  
59 nutritional assessments of both mother and child, management of minor and common illnesses,  
60 improving immunization coverage and imparting health education. [12]

61 This study recognizes the LHW as a powerful conduit for reaching under 5 children at household  
62 level and identifying severe pneumonia in under five at an early stage. It also recognizes the  
63 underestimation of hypoxemia (SpO<sub>2</sub> of <90%), a major risk factor for pneumonia mortality at  
64 community level and assesses its prevalence. The reported prevalence of hypoxemia in under 5  
65 acutely ill children is 5 to 58% in facilities [13-16] and 16 to 39% in community settings. [17] A  
66 4.3 times higher risk of mortality has been associated with pneumonia with hypoxemia than in  
67 children with pneumonia without hypoxemia. [13] Hypoxemia is also predictive of treatment  
68 failure with amoxicillin in 3-59 months old children. [18] In resource poor settings where pulse  
69 oximetry is not feasible, signs and symptoms of severe pneumonia (sleepiness, cyanosis, head

1  
2  
3 70 nodding/grunting, and inability to move) are used as predictors of hypoxemia. However, the  
4  
5 71 validity of clinical signs to predict hypoxemia varies and it is often difficult for physicians working  
6  
7 72 in settings, where objective detection of hypoxemia is not available, to decide whether the child  
8  
9 73 coming with severe pneumonia requires administration of oxygen or not. [15, 19, 20]

10  
11 74 Pulse oximetry [16] is a rapid, portable, non-invasive and accurate method of measuring arterial  
12  
13 75 hemoglobin oxygenation (SpO<sub>2</sub>) and has therefore been used in trial and clinical settings to detect  
14  
15 76 hypoxemia. Appropriate oxygen therapy (based on PO findings rather than clinical signs of  
16  
17 77 severity alone) has been associated with lower mortality risk. [19] Assuming access to  
18  
19 78 supplemental oxygen, PO could potentially avert up to 148,000 severe pneumonia related deaths  
20  
21 79 if implemented, and, combining PO with IMCI assessment for pneumonia has been shown to be  
22  
23 80 cost effective in 15 high burden countries. [21] Emdin et al found first level Lady Health Workers  
24  
25 81 in peri-urban Karachi could easily perform pulse oximetry on young infants on well and sick visits  
26  
27 82 to a primary health care facility. [22]

28  
29 83 Over the past decade, the possible impact of pulse oximetry in hospital and community settings  
30  
31 84 has been of interest across the globe. Health survey of 54 countries in 2010, suggested that 19.2%  
32  
33 85 of the operating theatres around the globe are not equipped with pulse oximeters [23]. Trials  
34  
35 86 assessing utility of pulse oximetry on a health systems level in Nigeria have shown that health  
36  
37 87 workers reserve PO for the sickest patients [24, 25]. This has also been observed in areas at higher  
38  
39 88 altitudes with higher prevalence of hypoxemia (highlands of Papua New Guinea) [25, 26]. There  
40  
41 89 is lack of clarity about how pulse oximetry can be used in the community where lower hypoxemia  
42  
43 90 prevalence may be a lesser incentive for health workers to use PO such as in interior Sindh settings  
44  
45 91 in Pakistan. Then again, health workers recruited from within communities may be better invested  
46  
47 92 and motivated than hospital personnel in following case management guidelines precluding PO. It  
48  
49 93 is therefore worthwhile to explore and describe contexts behind a family's acceptance (or not) of  
50  
51 94 referral advice whether based on technology and/or clinical examination in rural settings where  
52  
53 95 the highest burden of pneumonia deaths lies.

54  
55 96 Feasibility and sustainability audits of oxygen delivery systems in the Gambia and Egypt have  
56  
57 97 shown that providing technology alone is ineffective, and should preclude provision of supplies,  
58  
59 98 education, training and feedback [27-30]. This protocol paper describes a study to assess the effect

99 of PO monitoring in community settings on hospital referral acceptance in children under 5 with  
100 severe pneumonia.

## 101 **Methods**

### 102 **Study aims and design:**

103 The overall aim of the study is to assess if detection of hypoxemia, and/or severe pneumonia in  
104 children 0-59 months by LHWs during their monthly home visits will increase hospital referral  
105 acceptance among families in District Jamshoro, Sindh, Pakistan.

106 Primary objectives are:

- 107 1) To assess and compare the impact of ‘pulse oximetry’ used by LHWs at household level  
108 on increasing hospital referral acceptance rates in intervention clusters (district Jamshoro)  
109 for 0-59 months old children with severe pneumonia with the impact of LHWs using  
110 clinical signs alone in non-intervention clusters of the same district
- 111 2) To investigate the likely predictors (demographic, clinical) of hospital referral acceptance  
112 in both the groups

113 Secondary objective is:

- 114 3) To compare clinical outcomes (treatment completion, treatment failure, hypoxemia) of  
115 children 0-59 months who accepted referral to those who refused admission and were  
116 treated at home

117 A community-based cluster randomized trial will be conducted in district Jamshoro, among  
118 children of ages 0-59 months (**Figure 1**). In intervention areas, all children with cough, fever or  
119 difficulty in breathing (acute respiratory illness) will be assessed for study eligibility (signs and  
120 symptoms of severe pneumonia, OR hypoxemia alone, OR severe pneumonia with hypoxemia) by  
121 LHWs during their monthly home visit in their catchment area. In control areas, study eligibility  
122 will require detection of signs of severe pneumonia alone (**Appendix 1**) during LHW monthly  
123 visits. Data will be collected on demographics, likely predictors, and clinical outcomes using a  
124 structured questionnaire.

125 The primary outcome is hospital referral acceptance in children under 5 with severe pneumonia  
126 and to identify demographic and clinical predictors of hospital referral acceptance. The predictors

1  
2  
3 127 will include distance of child home to referral facility, socio-economic status of household,  
4  
5 128 parental education, child age, nutritional status, respiratory rate, temperature, hypoxemia and  
6  
7 129 presence of other illnesses.

8  
9 130 Secondary outcomes include duration of oxygen therapy, treatment failure, duration of hospital  
10  
11 131 stay, vital and health status of child at day 7<sup>th</sup> and 14<sup>th</sup>.

### 12 13 132 **Trial setting:**

14  
15 133 The study will be conducted within the community of Taluka Kotri in District Jamshoro, Sindh  
16  
17 134 (**Figure 2**). Jamshoro District has a population of 993,142 [31]. It is predominantly rural, with  
18  
19 135 33% literacy, and >50% employed daily wage laborers. A baseline survey conducted as a part of  
20  
21 136 current study showed the status of overall health indicators: skilled birth attendance 57%, antenatal  
22  
23 137 care coverage 75%, postnatal care cover for mother and newborn within 48 hours 31.5%,  
24  
25 138 vaccination completeness in children 12-23 months 68% and care seeking for ARI and diarrhea  
26  
27 139 >80% (internal survey). A total of 27 health facilities function in the district including one District  
28  
29 140 Headquarter (DHQ) Hospital, three Taluka Headquarter (THQ) Hospitals, five Rural Health  
30  
31 141 Centers (RHCs) and 18 Basic Health Units (BHUs). The district is divided administratively in 30  
32  
33 142 union councils. Kotri is one of the 4 Talukas of Jamshoro, consists of 44% (437,561) of the  
34  
35 143 population of district [31].

36  
37 144 Participants will be the permanent residents of Kotri, Jamshoro and recruited from their homes  
38  
39 145 during routine monthly visits by Lady Health Workers serving in their catchment areas. This study  
40  
41 146 is expected to run for 48 months with participant identification and enrolment conducted  
42  
43 147 simultaneously in intervention and control clusters over 21 months after an initial pilot of one  
44  
45 148 month. Each enrolled child will be revisited at day 7 and 14 for outcome measurement.

### 46 47 149 **Participant:**

48  
49 150 Any child aged 0-59 months having signs and symptoms of acute respiratory illness (cough, fever,  
50  
51 151 difficulty in breathing) in intervention clusters will undergo assessment of 1) signs and symptoms  
52  
53 152 of severe pneumonia and, 2) pulse oximetry during monthly LHW home visits). Presence of severe  
54  
55 153 pneumonia with or without hypoxemia, or hypoxemia alone will merit hospital referral (non-  
56  
57 154 facilitated). Any child aged 0-59 months having signs and symptoms of acute respiratory illness  
58  
59 155 (cough, fever, difficulty in breathing) in control clusters will undergo assessment of 1) signs and



1  
2  
3 156 symptoms of severe pneumonia alone. Presence of severe pneumonia will merit hospital referral  
4  
5 157 (non-facilitated). Exclusion criteria will include lack of consent and, non-availability (lost to  
6  
7 158 follow up, migration) on days of scheduled follow-up visits (days 7 and 14). Those who accepted  
8  
9 159 referral but did not show up at hospital will be included in final analysis.

### 10 **Randomization and masking:**

11  
12  
13 161 Study clusters were defined as the area covered by an LHW. Each LHW covers a minimum of 100  
14  
15 162 households. A list of LHWs working in Kotri was collected from the LHW program, Health  
16  
17 163 Department Government of Sindh. There is a total of 188 active LHWs in the study site. A baseline  
18  
19 164 survey was conducted to collect data on health indicators from the LHW catchments. The clusters  
20  
21 165 were randomly allocated to intervention and control groups on 1:1 fashion with a computer-  
22  
23 166 generated randomization sequence that was generated by an independent expert. Clusters were  
24  
25 167 matched on under-5 population and distance to referral health facility. No stratification was used  
26  
27 168 for allocation; clusters were selected to ensure that the reporting and training centres of  
28  
29 169 intervention and control LHWs were separate. The investigators and the national and provincial  
30  
31 170 LHW program coordinators will be excluded from the allocation process.

### 32 **Training of Lady Health Workers:**

33 172 The Lady Health Worker (LHW) program of Pakistan consists of a community-based group of  
34  
35 173 first-level health workers with the principal mandate of home-based Maternal and Child Health.  
36  
37 174 The recruitment process is well defined and selection criteria include: at least 8 years of education  
38  
39 175 with middle school pass, local residency, recommendation from the community, and preferably  
40  
41 176 married [32]. Once selected, they receive 15 months of basic training in mid-wifery and family  
42  
43 177 planning using standardized training manuals and curriculum, and periodic refresher training  
44  
45 178 courses. Each of these LHWs is typically responsible for approximately 1000 people, or 150  
46  
47 179 homes, and often serve as the primary health care contact in these rural communities [32, 33].

50  
51  
52 180 We chose LHWs as study personnel due to their access to homes on regular monthly basis. We  
53  
54 181 trained intervention and control LHWs in separate groups for all of the following: 1) classification  
55  
56 182 of ARI (no pneumonia, pneumonia, severe pneumonia) using standard acute respiratory infections

1  
2  
3 183 training modules (WHO and IMNCI) 2) identification of danger signs 3) case management of  
4  
5 184 pneumonia at home with oral amoxicillin and severe pneumonia with stat dose of antibiotic before  
6  
7 185 hospital referral. Intervention LHWs received an additional training in using a pulse oximeter and  
8  
9 186 obtaining a valid reading. The Principal Investigator led these training sessions with senior trainers  
10  
11 187 of the LHW program (Lady Health Supervisors).

## 12 188 **Participant Recruitment and Study Procedures:**

### 14 189 **Intervention delivery**

16  
17 190 Children aged 0–59 months with cough and/or difficult breathing during regular home visits of  
18  
19 191 LHWs will be assessed for firstly, signs and symptoms of severe pneumonia (fast breathing/chest  
20  
21 192 in-drawing and one or more danger sign (unable to eat/drink, vomiting, convulsion and  
22  
23 193 lethargy/unconsciousness) and/or Stridor)) and secondly, hypoxemia (SpO<sub>2</sub> <92%) using a  
24  
25 194 handheld pulse oximeter (Masimo Rad-5v) to measure blood oxygen saturation level. LHWs will  
26  
27 195 also do case management of children with pneumonia and severe pneumonia. A 3-day course of  
28  
29 196 oral amoxicillin will be given to children with pneumonia at home, whereas children meeting  
30  
31 197 referral criteria (severe pneumonia alone, hypoxemia alone, or severe pneumonia and hypoxemia)  
32  
33 198 after obtaining informed consent (**Appendix 2**), will be administered a stat dose of oral amoxicillin  
34  
35 199 and referred to nearest referral hospital (DHQ Kotri).

36  
37 200 The study investigators will have provided these pulse oximeters to the LHW Program in advance  
38  
39 201 and highlighted which ones will receive them. Physicians at the referral center serving the  
40  
41 202 intervention clusters will also receive handheld pulse oximeters. All the LHWs and staff will be  
42  
43 203 trained on the use, and maintenance of these pulse oximeters. Children with severe pneumonia  
44  
45 204 with or without hypoxemia will be advised to go to hospital for antibiotics and oxygen, using the  
46  
47 205 PO reading as a tool to convince parents. Children with hypoxemia alone, without signs of severe  
48  
49 206 pneumonia will be referred to hospital to rule out cyanotic congenital heart disease. Name of the  
50  
51 207 pre-designated health facility with available oxygen and study physician will be provided to all the  
52  
53 208 LHWs so that Study Workers (non-LHW study personnel) can coordinate with Study Physicians  
54  
55 209 and ensure the patient has reached and is receiving safe and recommended care at referral facility.  
56  
57 210 Project staff will pretest and regularly monitor PO accuracy and quality of readings.

58  
59 211 Hypoxemia will be defined as an arterial oxygen saturation (SpO<sub>2</sub>) <92%. SpO<sub>2</sub> measurement  
60  
212 will be recorded after 1 minute of stable observation. If the SpO<sub>2</sub> comes 92% or less, the child will

1  
2  
3 213 first be assessed for nasal obstruction with readings repeated after applying nasal saline drops. If  
4  
5 214 repeat reading shows hypoxemia, the child will be referred to nearest designated referral hospital  
6  
7 215 and admitted for oxygen via nasal or nasopharyngeal route and intravenous antibiotics, as per  
8  
9 216 recommendations.

### 10 11 217 **Implementation of active control: Clinical Signs assessment**

12  
13 218 Children aged 0–59 months with cough and/or difficult breathing during regular home visit will  
14  
15 219 be assessed by LHWs for signs and symptoms of severe pneumonia (fast breathing/chest in-  
16  
17 220 drawing and one or more danger sign (unable to eat/drink, vomiting, convulsion and  
18  
19 221 lethargy/unconsciousness) and/or Stridor)). A 3-day course of oral amoxicillin will be given to  
20  
21 222 children with pneumonia at home, whereas children with severe pneumonia (eligible for  
22  
23 223 recruitment) will be requested for informed consent and offered stat dose of oral amoxicillin and  
24  
25 224 referral to nearest referral hospital.

### 26 225 **Procedure at referral facility**

27  
28 226 Children who accept hospital referral in both intervention and control clusters and reach hospital  
29  
30 227 premises with LHW referral slip will be assessed by study physician at the referral center. An SMS  
31  
32 228 notification with brief details of referred child will have been provided to trained study personnel  
33  
34 229 (study physician) in advance at time of referral at both the referral facilities. Children with severe  
35  
36 230 pneumonia and/or hypoxemia as per LHWs who reach referral hospital premises will be examined  
37  
38 231 and subjected to pulse oximetry again by the study physician at referral facility. If signs and  
39  
40 232 symptoms of severe pneumonia are present, the child will be admitted for further appropriate  
41  
42 233 treatment (Oxygen therapy via nasal or nasopharyngeal route and intravenous antibiotics etc.) and  
43  
44 234 if the symptoms are not severe (absence of danger sign), the child will be treated in outpatient care  
45  
46 235 as per the standard of referral facility. All the children admitted at referral facility will undergo 12  
47  
48 236 hourly monitoring by study personnel and filling of case reporting form (CRF) and hospital  
49  
50 237 physician form (HPF) at day 1, 7 and 14. Those children who refused the referral will be visited  
51  
52 238 by study community health workers after 24 hours to confirm referral refusal and to fill CRF.

53  
54 239 Preliminary meetings will be held with the Executive Director Health Jamshoro, Director General  
55  
56 240 Health Sindh, In-charge Lady Health Worker Program Sindh and In-charge Pediatric Units  
57  
58 241 LUMHS to ensure their cooperation through study duration. Emergency and pediatric unit staff  
59  
60 242 at the referral facilities along with study personnel (physician/nurse) will be trained on

1  
2  
3 243 management of severe pneumonia according to the integrated management of neonatal and  
4 244 childhood illnesses (IMNCI) guidelines [34]. A baseline survey will be conducted at the health  
5 245 facilities to ensure availability of oxygen and necessary intravenous antibiotics. Even though it is  
6 246 ideal to guarantee sustainable oxygen systems at the two chosen referral public sector hospitals,  
7 247 this study does not provide oxygen and therefore aims to assess ‘real-life’ situations in public  
8 248 hospitals and their impact on severe pneumonia outcomes with or without hypoxemia. LHWs will  
9 249 be incentivized on basis of their contribution to the study activities.

### 15 250 **Data Collection and Storage**

16 251 Data will be collected by LHWs during house visits (Screening form), community health workers  
17 252 (during follow up visits day 1, 7 and 14) and hospital based study personnel (for all who accept  
18 253 referral and reach hospital premises) on paper forms (**Appendix 3**). Given that it will be a new  
19 254 experience for LHWs to assess, classify and manage ARI cases and at the same time record  
20 255 findings on data forms accurately, these will be supervised closely and frequently, at least for the  
21 256 first pneumonia season. Well trained study field supervisory officers and LHW supervisors will  
22 257 be required to perform regular field supervision in their respective clusters and ensure accurate  
23 258 and logically entered data forms and make necessary verifications and corrections at the data  
24 259 collection sites and give feedback to the LHW to avoid repeating the errors. Raw data brought to  
25 260 the program office will be checked once again for accuracy by the technical staff and approved for  
26 261 entry in the computer. All raw data will be safely kept in the AKU office, appropriately numbered  
27 262 by cluster, until seven years after the study is over.

### 28 263 **Case History Records**

29 264 These include the study case report forms (CRF) and hospital physician form (HPF) that will  
30 265 contain information that documents the child’s eligibility to participate in the study, the signed  
31 266 consent form, and information from tests and examinations. Wherever possible copies of  
32 267 supporting documentation for the information contained in the CRF should be kept with each  
33 268 patient’s case history record. This supporting documentation may include records of physical  
34 269 examinations, progress notes, laboratory reports, X-rays, consultations, correspondence,  
35 270 information and data on the subject’s condition, during and after the clinical investigation,  
36 271 diagnoses made, concomitant therapy, etc. All information in the case history records should be  
37 272 attributable to a specific individual. Since the CRF will not contain the patient’s name, there will

1  
2  
3 273 be a unique link between the ID number on the CRF and the patient's name. Each child's case  
4  
5 274 history record will be evaluated to verify validity and completeness of the data on the CRF when  
6  
7 275 a study monitor visits the study site. All corrections to CRF's must be made without obscuring the  
8  
9 276 original entry. The revised entry should be inserted and the person making the correction should  
10  
11 277 sign and date the correction. Only authorized study personnel may complete or correct case report  
12  
13 278 forms.

### 14 279 **Data Management**

15  
16 280 Screening data will be collected on paper by LHWs. Case reporting form (CRF) and Hospital  
17  
18 281 physician form will be collected on electronic forms. To ensure proper implementation of the  
19  
20 282 intervention, the field supervisors will make spot checks and will arrange monthly refresher group  
21  
22 283 sessions of the first-line health workers in which the problems encountered will be discussed and  
23  
24 284 resolved. In addition, the data collection activity will be carried out by teams consisting of  
25  
26 285 LHWs/CHWs and study staff will be further monitored by field supervisors who will perform a  
27  
28 286 check on a subset (5%) of households.

29 287 An information system will be set up to keep track all patients screened and enrolled and a filing  
30  
31 288 system to keep all study related records - case history records, study protocol or related  
32  
33 289 documentation and drug distribution records. The coordinator at the site will be responsible for  
34  
35 290 the completeness and accuracy of all the study materials.

### 36 291 **Study Protocol and Related Documentation**

37  
38 292 All study related documents including the study protocol, manuals of operations, all  
39  
40 293 correspondence sent to or received from the study monitor, materials used for obtaining informed  
41  
42 294 consent, protocol modifications and records of the Institutional Review Board approval and all  
43  
44 295 communications with the IRB must be maintained in complete form. These documents will be  
45  
46 296 evaluated to ensure that study documentation is complete and current when a study monitor visits  
47  
48 297 the study site.

### 49 298 **Record Retention**

50  
51 299 Retention of accurate and complete records is essential to establish the validity and completeness  
52  
53 300 of the study. All records must be retained for 7 years after the data set is frozen. Electronic data  
54  
55  
56  
57  
58  
59  
60

1  
2  
3 301 will be de-identified, unlinked from any personal identifiers and therefore will protect individual  
4  
5 302 identity.

6  
7 303 **Reporting of Serious Adverse Events and Treatment Failures**

8  
9 304 Amoxicillin is in widespread use and is not investigational in any study site. However, since oral  
10  
11 305 amoxicillin is not routinely recommended for initial treatment of children who have severe  
12  
13 306 pneumonia, the appropriate case report forms describing the occurrence of a serious adverse event,  
14  
15 307 treatment failure or death must be faxed to the coordinating center within 72 hours of the site  
16  
17 308 coordinator knowing about the event. Adverse events, treatment failure and death must be reported  
18  
19 309 to allow appropriate interpretation of this critical information. If the outcome of the adverse event  
20  
21 310 is unknown when the site coordinator first notifies the coordinating center, a follow-up form must  
22  
23 311 be faxed to the coordinating center within 10 days of knowing about the event. The PI should send  
24  
25 312 a copy of the adverse event data to their local IRB as soon as possible. The coordinating center  
26  
27 313 will summarize the Adverse Event and Death information and send a report to the IRB/ERC of  
28  
29 314 sponsors and to site IRBs. Both the rate of adverse events and the rate of patient accrual at each  
30  
31 315 individual site will be monitored to determine if stopping rules are met. We do not anticipate  
32  
33 316 serious adverse events. However, in case of one, a DSMB will be requested for and convened on  
34  
35 317 ad hoc basis for safety review at any time during the study if there is a concern regarding rates of  
36  
37 318 adverse events or rates of patient accrual. Adverse events will be reported by the study physician  
38  
39 319 to the principal investigator and clinically managed by the study physician in conjunction with  
40  
41 320 other physicians at the institution. Any related and unexpected life-threatening adverse event  
42  
43 321 including death will be reported to the IRB within 2 business days as per IRB protocol and any  
44  
45 322 related, unexpected and serious adverse event will be reported to the IRB within 10 business days  
46  
47 323 as per IRB protocol.

48  
49 324 **Compliance with and Deviations from the Study Protocol**

50  
51 325 The Site coordinator must agree with and sign the protocol and confirm in writing that he or she  
52  
53 326 has read, understands and will work according to the protocol and Good Clinical Practice. The  
54  
55 327 Site coordinator is responsible for making sure that the protocol is strictly followed and should not  
56  
57 328 make any changes to the study unless necessary to eliminate an apparent immediate hazard or  
58  
59 329 damage to a trial subject. Any deviations from the study protocol including but not limited to  
60  
330 inappropriate enrollment of a study subject, administration of the wrong study treatment, missed



331 doses of study treatment, missed observation points, incorrect administration of concomitant  
332 medications, etc. should be reported to the coordinating center and each site's IRB. The report  
333 should include a plan to rectify any problems at the site that may have caused the protocol  
334 deviation.

### 335 **Sample size:**

336 Defining a cluster as (the catchment area of) one Lady Health Worker (LHW), and assuming a  
337 power of 90% in detecting 50% increase in referral acceptance from a 10 % baseline to 15% among  
338 0-59 month old children with severe pneumonia (pneumonia prevalence at 2 week recall (MICS  
339 Sindh):7.5% (18% of which is assumed severe Pneumonia) with ICC 0.001736. We need to  
340 capture a total of 4160 children with severe pneumonia in both intervention and control groups.

### 341 **Data Analysis:**

342 The primary analysis for each outcome will perform on an 'intention-to-treat' (ITT) basis, i.e. all  
343 children included in the analysis who were enrolled in the study according to the group to which  
344 they were allocated. All analyses will account for the cluster-randomized design to ensure correct  
345 type I error rates and confidence intervals [35]. Baseline characteristics will be compared by  
346 analyzing differences in means and proportions among the study arms. Categorical outcomes will  
347 be compared using chi square test and continuous outcomes using Student's t-test. For analysis of  
348 predictors of referral acceptance, generalized linear model will be used with logit link function.  
349 The univariate analysis will be conducted to explore the independent effect of each predictor on  
350 outcome. The variables significant at a liberal p-value of <0.20 will be included in multivariate  
351 model for adjustment. The results will be reported as relative risk (RR) with 95% CI. Type 1 error  
352 will be set at 5% level. All analysis will be done using STATA version 15.

### 353 **Patient and Public Involvement**

354 Patients or the public will not be involved in the design or conduct of the study. Results will be  
355 disseminated to the community.

### 356 **Study Status**

357 Recruitment began in August 2019 and field activities and data collection are in process. As of  
358 16<sup>th</sup> October 2020, a total of 235 cases and 184 controls have been enrolled. Extension of study  
359 duration is in discussion to achieve sample size.

## 360 Discussion

361 Hypoxemia, a frequent complication of severe pneumonia, is a major risk factor for death in  
362 children under 5. Theoretically, detection of hypoxemia at community level among severe  
363 pneumonia cases by the use of pulse-oximeter would give awareness to the caregivers about  
364 severity of illness and reduce delay in hospital referral. Delayed care-seeking is a recognized risk  
365 factor in pneumonia mortality in community settings [36]. Unfortunately, information on  
366 prevalence of hypoxemia, effectiveness of its detection in influencing parents to seek hospital care  
367 (gold standard for severe pneumonia), and impact of appropriate care at hospital in settings like  
368 Pakistan is lacking. Thus, the findings of this study will build evidence for utility of providing  
369 front-line workers like LHWs with a tool to detect hypoxemia if signs and symptoms of pneumonia  
370 are present. Interestingly various groups across the world are now espousing pulse-oximetry with  
371 other strengths like detection of congenital heart disease [37, 38] and newborn sepsis [39].

### 372 Limitations

373 Some union councils with poor LHW coverage were not included in this study. This was a  
374 compromise on generalizability in favour of feasibility. It may have led to exclusion of children  
375 whose referral patterns were important to gauge. We also did not offer facilitated referral in either  
376 arm. This may have affected referral acceptance in both groups however will allow assessment of  
377 real-life impact of transportation barriers.

378 Though we kept hospital referral (as recommended by WHO) for severe pneumonia as our standard  
379 of care, it was beyond the scope of this study to ensure that referral centres had sustainable oxygen  
380 systems/capacity for non-invasive ventilation in children with severe pneumonia, or readily  
381 available cardiac evaluation resources for children with hypoxemia alone. Duke et al showed  
382 improved case fatality rates by providing oxygen concentrators and pulse-oximeters at five  
383 hospitals in PNG along with protocols for use [35]. Lack of quality care at referral hospitals in  
384 developing countries is a recognized barrier to health care seeking behavior[40, 41].

385 If our study reveals pulse-oximetry has influenced health-seeking behavior significantly, we will  
386 need to follow with a more systematic evaluation of pneumonia care at rural hospitals which vary  
387 in quality of care. We will also need to correlate recovery rates in those who accepted hospital  
388 referral versus those who stayed home on oral amoxicillin. Evidence to support home care for  
389 severe pneumonia is poor [42].



1  
2  
3 390 The COVID pandemic has adversely affected recruitment in the study with disruption of field  
4 391 activities for many months in 2020. We anticipate prolongation of study duration in order to  
5 392 achieve sample size.  
6  
7  
8

9 393

### 11 394 **Ethics and Dissemination**

13 395 This study has been approved by the Ethical Review Committee of The Aga Khan University  
14 396 (4722-Ped-ERC-17), Karachi, Pakistan in June 2017. Written informed consent in the local  
15 397 language will be obtained from parents or guardians of all participants. Data forms will contain no  
16 398 identifying information other than age, sex and GIS coordinates. Laboratory forms will contain no  
17 399 identifying information, specimens will be identified by a study number only and test results will  
18 400 not be linked to any individual by name. All survey staff will sign a confidentiality agreement to  
19 401 ensure that they do not release participant identities and test or study results to individuals who are  
20 402 not part of the study team.  
21  
22  
23  
24  
25  
26

27 403 Study progress and findings will be shared with sponsors (BMGF) quarterly. Results will be  
28 404 presented at national and international research meetings and conferences and also prepared for  
29 405 publication in international peer-reviewed scientific journals. Study findings will be disseminated  
30 406 to the study communities.  
31  
32  
33  
34

### 35 407 **Declarations:**

36  
37 408 **Consent for publication:** Yes

38  
39 409 **Availability of data and materials:** The datasets used for the article and the study is available  
40 410 from the corresponding author on request.

41 411 **Competing interests:** The authors declare that they have no competing interests.

42 412 **Funding:** The study is funded by Bill & Melinda Gates Foundation through Grant OPP1148892.

43 413 **Author Contributions:** FM, ZM, MAH, SBS & ZAB: conceptualization of project. FM, AAN,  
44 414 and SC: development of study design and questionnaires. AAN and SC: oversight of data  
45 415 collection. AAN, SC and AH: support of study logistics and field activities. IA and AR: statistical  
46 416 analyses. SBS and ZAB: overall supervision and critical input. All authors have read and approved  
47 417 the final manuscript.  
48  
49  
50  
51  
52  
53  
54  
55  
56  
57  
58  
59  
60

1  
2  
3 418 **Acknowledgements:** We would like to acknowledge the mothers and families who have  
4  
5 419 contributed to the study. We are grateful to the Sindh LHW Program, Department of Health for  
6  
7 420 their support and facilitation of the trial.  
8  
9 421  
10 422  
11  
12 423  
13  
14 424

15  
16  
17  
18  
19  
20  
21  
22  
23  
24  
25  
26  
27  
28  
29  
30  
31  
32  
33  
34  
35  
36  
37  
38  
39  
40  
41  
42  
43  
44  
45  
46  
47  
48  
49  
50  
51  
52  
53  
54  
55  
56  
57  
58  
59  
60

For peer review only

1  
2  
3 425 **Figure caption**

4 426 Figure 1: Trial Profile

5 427 Figure 2: Study Map: intervention and control sites

6  
7  
8  
9 428

10  
11 429 **References**

- 12  
13 430 1. Liu, L., et al., *Global, regional, and national causes of child mortality: an updated systematic*  
14 431 *analysis for 2010 with time trends since 2000*. *Lancet*, 2012. **379**(9832): p. 2151-61.
- 15 432 2. Rudan, I., et al., *Epidemiology and etiology of childhood pneumonia*. *Bull World Health Organ*,  
16 433 2008. **86**(5): p. 408-16.
- 17 434 3. *WHO/UNICEF Joint Statement: Management of Pneumonia in community settings*. 2002.
- 18 435 4. *Ending Preventable Child Deaths from Pneumonia and Diarrhoea by 2025: The integrated Global*  
19 436 *Action Plan for Pneumonia and Diarrhoea (GAPPD)*. 2013, World Health Organization: Geneva,  
20 437 Switzerland.
- 21 438 5. Soofi, S., et al., *Effectiveness of community case management of severe pneumonia with oral*  
22 439 *amoxicillin in children aged 2-59 months in Matiari district, rural Pakistan: a cluster-randomised*  
23 440 *controlled trial*. *Lancet*, 2012. **379**(9817): p. 729-37.
- 24 441 6. Kallander, K., D.H. Burgess, and S.A. Qazi, *Early identification and treatment of pneumonia: a call*  
25 442 *to action*. *Lancet Glob Health*, 2015. **4**(1): p. e12-3.
- 26 443 7. Owais, A., et al., *Why do families of sick newborns accept hospital care? A community-based*  
27 444 *cohort study in Karachi, Pakistan*. *J Perinatol*, 2011. **31**(9): p. 586-92.
- 28 445 8. Zaidi, A.K., et al., *Community-based treatment of serious bacterial infections in newborns and*  
29 446 *young infants: a randomized controlled trial assessing three antibiotic regimens*. *Pediatr Infect Dis*  
30 447 *J*, 2012. **31**(7): p. 667-72.
- 31 448 9. Ferdous, F., et al., *Mothers' perception and healthcare seeking behavior of pneumonia children in*  
32 449 *rural bangladesh*. *ISRN Family Med*, 2014: p. 690315.
- 33 450 10. Waiswa, P., et al., *Using the three delays model to understand why newborn babies die in eastern*  
34 451 *Uganda*. *Trop Med Int Health*, 2010. **15**(8): p. 964-72.
- 35 452 11. *LADY HEALTH WORKER PROGRAM FOR FAMILY PLANNING AND PRIMARY HEALTH CARE*. Available  
36 453 from: <https://www.sindhhealth.gov.pk/LHW-Program>.
- 37 454 12. Afsar, H., et al., *Factors affecting unsuccessful referral by the lady health workers in Karachi,*  
38 455 *Pakistan*. *Journal-Pakistan Medical Association*, 2003. **53**(11): p. 521-528.
- 39 456 13. Onyango, F.E., et al., *Hypoxaemia in young Kenyan children with acute lower respiratory infection*.  
40 457 *BMJ*, 1993. **306**(6878): p. 612-5.
- 41 458 14. Smyth, A., H. Carty, and C.A. Hart, *Clinical predictors of hypoxaemia in children with pneumonia*.  
42 459 *Ann Trop Paediatr*, 1998. **18**(1): p. 31-40.
- 43 460 15. Usen, S., et al., *Clinical predictors of hypoxaemia in Gambian children with acute lower respiratory*  
44 461 *tract infection: prospective cohort study*. *BMJ*, 1999. **318**(7176): p. 86-91.
- 45 462 16. McCollum, E.D., et al., *Multicenter study of hypoxemia prevalence and quality of oxygen treatment*  
46 463 *for hospitalized Malawian children*. *Trans R Soc Trop Med Hyg*, 2013. **107**(5): p. 285-92.
- 47 464 17. Basnet, S., R.K. Adhikari, and C.K. Gurung, *Hypoxemia in children with pneumonia and its clinical*  
48 465 *predictors*. *Indian J Pediatr*, 2006. **73**(9): p. 777-81.
- 49 466 18. Fu, L.Y., et al., *Brief hospitalization and pulse oximetry for predicting amoxicillin treatment failure*  
50 467 *in children with severe pneumonia*. *Pediatrics*, 2006. **118**(6): p. e1822-30.

- 1  
2  
3 468 19. Duke, T., et al., *Hypoxaemia in acute respiratory and non-respiratory illnesses in neonates and*  
4 469 *children in a developing country.* Arch Dis Child, 2002. **86**(2): p. 108-12.
- 5 470 20. Weber, M.W., et al., *Predictors of hypoxaemia in hospital admissions with acute lower respiratory*  
6 471 *tract infection in a developing country.* Arch Dis Child, 1997. **76**(4): p. 310-4.
- 7 472 21. Floyd, J., et al., *Evaluating the impact of pulse oximetry on childhood pneumonia mortality in*  
8 473 *resource-poor settings.* Nature, 2015. **528**(7580): p. S53-9.
- 9 474 22. Emdin, C.A., et al., *Utility and feasibility of integrating pulse oximetry into the routine assessment*  
10 475 *of young infants at primary care clinics in Karachi, Pakistan: a cross-sectional study.* BMC Pediatr,  
11 476 2015. **15**: p. 141.
- 12 477 23. Funk, L.M., et al., *Global operating theatre distribution and pulse oximetry supply: an estimation*  
13 478 *from reported data.* The Lancet, 2010. **376**(9746): p. 1055-1061.
- 14 479 24. Ingram, G. and N. Munro, *The use (or otherwise) of pulse oximetry in general practice.* 2005, British  
15 480 Journal of General Practice.
- 16 481 25. Mokuolu, O.A. and O.A. Ajayi, *Use of an oxygen concentrator in a Nigerian neonatal unit: economic*  
17 482 *implications and reliability.* Ann Trop Paediatr, 2002. **22**(3): p. 209-12.
- 18 483 26. Matai, S., et al., *Implementing an oxygen programme in hospitals in Papua New Guinea.* Ann Trop  
19 484 Paediatr, 2008. **28**(1): p. 71-8.
- 20 485 27. Dobson, M., D. Peel, and N. Khallaf, *Field trial of oxygen concentrators in upper Egypt.* Lancet,  
21 486 1996. **347**(9015): p. 1597-9.
- 22 487 28. Enarson, P., et al., *Implementation of an oxygen concentrator system in district hospital paediatric*  
23 488 *wards throughout Malawi.* Bull World Health Organ, 2008. **86**(5): p. 344-8.
- 24 489 29. Hill, S.E., et al., *Oxygen for treatment of severe pneumonia in The Gambia, West Africa: a*  
25 490 *situational analysis.* Int J Tuberc Lung Dis, 2009. **13**(5): p. 587-93.
- 26 491 30. Howie, S.R., et al., *Meeting oxygen needs in Africa: an options analysis from the Gambia.* Bull  
27 492 World Health Organ, 2009. **87**(10): p. 763-71.
- 28 493 31. Pakistan, P.B.o.S.G.o. *PROVINCE WISE PROVISIONAL RESULTS OF CENSUS - 2017.* 2017; Available  
29 494 from: [http://www.pbs.gov.pk/content/block-wise-provisional-summary-results-6th-population-](http://www.pbs.gov.pk/content/block-wise-provisional-summary-results-6th-population-housing-census-2017-january-03-2018)  
30 495 [housing-census-2017-january-03-2018.](http://www.pbs.gov.pk/content/block-wise-provisional-summary-results-6th-population-housing-census-2017-january-03-2018)
- 31 496 32. Zhu, N., et al., *Lady health workers in Pakistan: improving access to health care for rural women*  
32 497 *and families.* Boston: Harvard School of Public Health, 2014.
- 33 498 33. Organization, W.H., *Global health workforce alliance. Pakistan's lady health worker Programme:*  
34 499 *Global Health workforce alliance.* World Health Organization, Case study. Geneva: World Health  
35 500 Organization, 2008.
- 36 501 34. *Integrated Management of Childhood Illness (IMCI) (revised).* 2014, Geneva: World Health  
37 502 Organization/The United Nation Children's Fund (UNICEF).
- 38 503 35. Duke, T., et al., *Improved oxygen systems for childhood pneumonia: a multihospital effectiveness*  
39 504 *study in Papua New Guinea.* The Lancet, 2008. **372**(9646): p. 1328-1333.
- 40 505 36. Ferdous, F., et al., *Pneumonia mortality and healthcare utilization in young children in rural*  
41 506 *Bangladesh: a prospective verbal autopsy study.* Tropical medicine and health, 2018. **46**(1): p. 1-  
42 507 10.
- 43 508 37. Engel, M.S. and L.K. Kochilas, *Pulse oximetry screening: a review of diagnosing critical congenital*  
44 509 *heart disease in newborns.* Medical Devices (Auckland, NZ), 2016. **9**: p. 199.
- 45 510 38. Tekleab, A.M. and Y.C. Sewnet, *Role of pulse oximetry in detecting critical congenital heart disease*  
46 511 *among newborns delivered at a high altitude setting in Ethiopia.* Pediatric Health, Medicine and  
47 512 Therapeutics, 2019. **10**: p. 83.
- 48 513 39. Jawin, V., et al., *Beyond critical congenital heart disease: newborn screening using pulse oximetry*  
49 514 *for neonatal sepsis and respiratory diseases in a middle-income country.* PLoS One, 2015. **10**(9): p.  
50 515 e0137580.

- 1  
2  
3 516 40. Latunji, O. and O. Akinyemi, *Factors influencing health-seeking behaviour among civil servants in*  
4 517 *Ibadan, Nigeria*. *Annals of Ibadan postgraduate medicine*, 2018. **16**(1): p. 52-60.  
5 518 41. Musoke, D., et al., *Health seeking behaviour and challenges in utilising health facilities in Wakiso*  
6 519 *district, Uganda*. *African health sciences*, 2014. **14**(4): p. 1046-1055.  
7 520 42. Das, R.R. and M. Singh, *Treatment of severe community-acquired pneumonia with oral amoxicillin*  
8 521 *in under-five children in developing country: a systematic review*. *PloS one*, 2013. **8**(6): p. e66232.  
9  
10  
11 522  
12  
13 523  
14  
15  
16  
17  
18  
19  
20  
21  
22  
23  
24  
25  
26  
27  
28  
29  
30  
31  
32  
33  
34  
35  
36  
37  
38  
39  
40  
41  
42  
43  
44  
45  
46  
47  
48  
49  
50  
51  
52  
53  
54  
55  
56  
57  
58  
59  
60

For peer review only

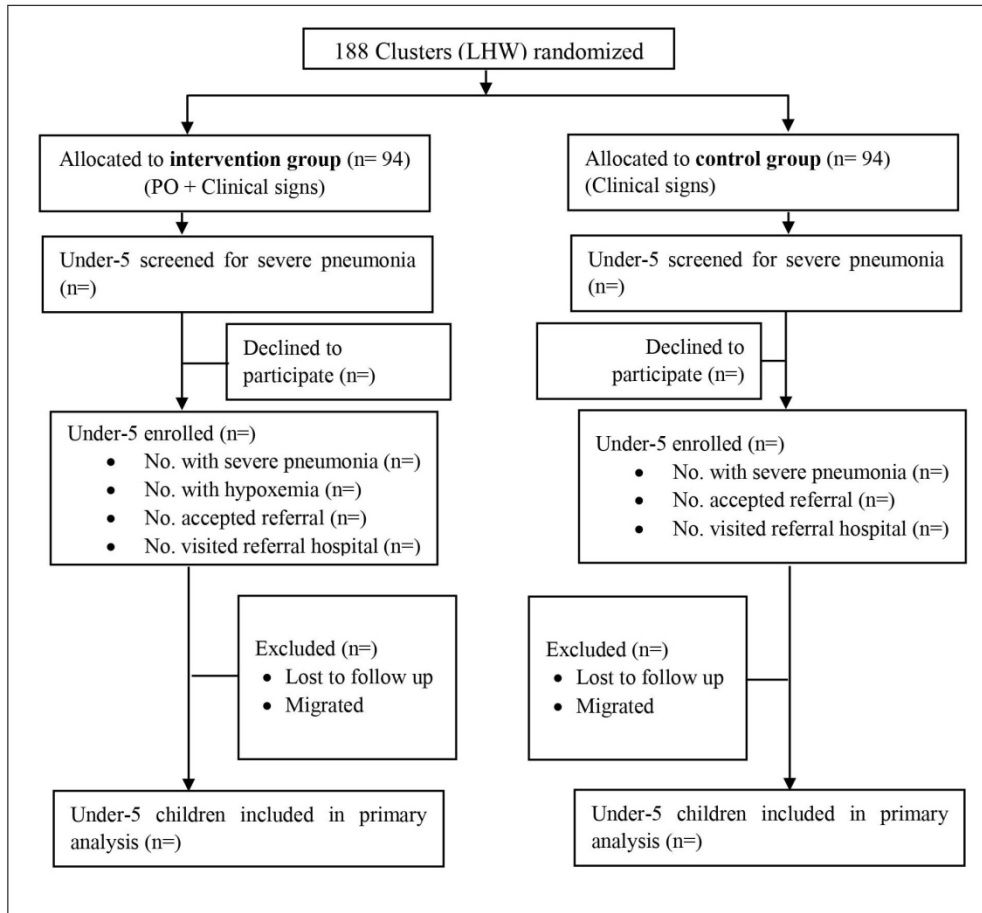

Trial Profile

514x481mm (96 x 96 DPI)

1  
2  
3  
4  
5  
6  
7  
8  
9  
10  
11  
12  
13  
14  
15  
16  
17  
18  
19  
20  
21  
22  
23  
24  
25  
26  
27  
28  
29  
30  
31  
32  
33  
34  
35  
36  
37  
38  
39  
40  
41  
42  
43  
44  
45  
46  
47  
48  
49  
50  
51  
52  
53  
54  
55  
56  
57  
58  
59  
60



Study Intervention and Control Sites

296x210mm (300 x 300 DPI)

## Appendix 1: Eligibility/Hospital Referral Criteria

| <b>Hospital Referral Criteria</b>                                                                                                                                                                                                                                                                                                                                                                                                                                                                                                                                                                                                                                                                                                                                                                                                                                                                                                                                        |                                                                                                                                                                                                                                                                                                                                                                                                                                                                                                                                                                                                                                                                                                                                                                                        |
|--------------------------------------------------------------------------------------------------------------------------------------------------------------------------------------------------------------------------------------------------------------------------------------------------------------------------------------------------------------------------------------------------------------------------------------------------------------------------------------------------------------------------------------------------------------------------------------------------------------------------------------------------------------------------------------------------------------------------------------------------------------------------------------------------------------------------------------------------------------------------------------------------------------------------------------------------------------------------|----------------------------------------------------------------------------------------------------------------------------------------------------------------------------------------------------------------------------------------------------------------------------------------------------------------------------------------------------------------------------------------------------------------------------------------------------------------------------------------------------------------------------------------------------------------------------------------------------------------------------------------------------------------------------------------------------------------------------------------------------------------------------------------|
| <b>Intervention Group</b>                                                                                                                                                                                                                                                                                                                                                                                                                                                                                                                                                                                                                                                                                                                                                                                                                                                                                                                                                | <b>Control Group</b>                                                                                                                                                                                                                                                                                                                                                                                                                                                                                                                                                                                                                                                                                                                                                                   |
| <p><b>Severe pneumonia AND/OR Hypoxemia</b></p> <p><b>Children of 0 – 6 days:</b></p> <ol style="list-style-type: none"> <li>1. 1. Fast Breathing (<math>\geq 60</math> breaths/min)<br/><b>AND/OR</b></li> <li>2. <i>Hypoxemia (&lt;92 SpO2 Blood Oxygen Level)</i></li> </ol> <p><b>Children of 7 days – 59 months:</b></p> <ol style="list-style-type: none"> <li>1. Fast Breathing and/or Chest In-drawing           <ul style="list-style-type: none"> <li>➤ 0-2months: <math>\geq 60</math> breaths/min</li> <li>➤ 2-12months: <math>\geq 50</math> breaths/min</li> <li>➤ 12-59months <math>\geq 40</math> breaths/min</li> </ul> <b>AND</b> </li> <li>2. Any ONE General Danger Sign* and/or Stridor           <ul style="list-style-type: none"> <li>➤ *Unable to drink/eat</li> <li>➤ Vomiting</li> <li>➤ Convulsions</li> <li>➤ Lethargy/Unconsciousness</li> </ul> </li> </ol> <p><b>AND/OR</b></p> <p><b>Hypoxemia (&lt;92 SpO2 Blood Oxygen Level)</b></p> | <p><b>Severe pneumonia</b></p> <p><b>Children of 0 – 6 days:</b></p> <ol style="list-style-type: none"> <li>1. Fast Breathing (<math>\geq 60</math> breaths/min)</li> </ol> <p><b>Children of 7 days – 59 months:</b></p> <ol style="list-style-type: none"> <li>1. Fast Breathing and/or Chest In-drawing           <ul style="list-style-type: none"> <li>➤ 0-2months: <math>&gt; 60</math> breaths/min</li> <li>➤ 2-12months: <math>\geq 50</math> breaths/min</li> <li>➤ 12-59months <math>\geq 40</math> breaths/min</li> </ul> <b>AND</b> </li> <li>2. Any ONE General Danger Sign* and/or Stridor           <ul style="list-style-type: none"> <li>➤ *Unable to drink/eat</li> <li>➤ Vomiting</li> <li>➤ Convulsions</li> <li>➤ Lethargy/Unconsciousness</li> </ul> </li> </ol> |



1  
2  
3  
4  
5 *Appendix 2: Informed Consent*  
6  
7

8 **Research Consent Form**  
9

10  
11 **Title of Research Project:**  
12

13 **Impact of Pulse Oximetry on Hospital Referral Acceptance in children under 5 with severe pneumonia in**  
14 **rural Pakistan (District Jamshoro): a cluster randomized trial (GAPPD Scale up Project)**  
15  
16

17  
18  
19 **Investigators:**

20 Dr. Fatima Mir (Principal investigator PO Project, AKU)

21 Department of Pediatrics and Child Health, Aga Khan University, Karachi, Pakistan

22 Tel: 92-21-34864955  
23  
24  
25

26  
27 Dr. Sajid Soofi (PI, Scale up of GAPPD in Pakistan)

28 Centre of Excellence in Women & Child Health, The Aga Khan University, Pakistan.

29 Tel: 92-21-34864955  
30  
31  
32  
33

34 Professor Zulfiqar Bhutta (Senior Investigator, Scale up of GAPPD in Pakistan)

35 Centre of Excellence in Women & Child Health, The Aga Khan University, Pakistan.

36 Tel: 92-21-34864955  
37  
38  
39  
40  
41

42 **Purpose of the Research:**  
43

44 Severe Pneumonia is a serious and possibly life-threatening infection in young children aged under 5 years. It  
45 may involve fast breathing, chest indrawing, and danger signs like inability to feed, convulsions, persistent  
46 vomiting and decreased movement. Hypoxemia is now recognized as an additional sign of severe pneumonia  
47 needing hospital admission. Pulse oximetry (the 'oxygen test') is a simple method whereby lady health  
48 workers can check level of oxygen in blood of children and decide which young babies need immediate  
49 medical care and referral to hospital for antibiotics and oxygen and which babies can be treated in the health  
50 center itself.  
51

52 In this study, we are testing whether use of pulse oximetry in addition to other danger signs of severe  
53 pneumonia will influence families to accept hospital referral in comparison to areas where danger signs other  
54 than hypoxemia are used.  
55

56 This project is a collaboration between Aga Khan University (AKU) in Karachi and the Gates Foundation,  
57 Seattle, USA.  
58  
59  
60

### **Description of the Research:**

We are inviting children aged 0 to 59 months screened at home to join this research study. If your baby joins the study, the following activities will take place:

- 1) **Questionnaire.** We will ask several questions about the health of your baby, as well as check him/her for presence of pneumonia. If he/she has signs of severe pneumonia (with or without hypoxemia), he will be eligible to take part in our study.
- 2) **Pulse oximetry.** Next your child may or may not undergo a pulse oximetry measurement dependent on whether he resides in an intervention or non-intervention cluster. The process will be painless for the child and will involve placing a sensor on your baby's foot or hand. Each sensor is attached to a pulse oximetry machine. A number on the screen of the machine shows the oxygen level. A level including and above 92% will be regarded as normal.

All babies with fast breathing or chest in drawing pneumonia AND any one of general danger signs (inability to feed, persistent vomiting, decreased movement, convulsions) with or without hypoxemia (SaO<sub>2</sub> <92%) will be advised and helped to go to an assigned hospital for treatment (antibiotics and possibly oxygen supportive therapy). Their clinical status over there will be followed and transfer to hospital and subsequent treatment will be facilitated by the study.

All responses will be documented on paper forms. We will arrange for quick referral to hospital if your baby has low oxygen level or other signs of serious illness. Follow-up visits by our study staff will be conducted to check the status of your baby.

- 3) You may be asked detailed questions based on whether you accept or refuse hospital referral to allow us to understand what factors contributed to your decision making. Since this process will take time, we will do it after the child's treatment plan has been started at hospital or at home.
- 4) **Video recording.** Some infants will be video recorded during the study. The researchers will look at these videos to make quality checks on study conduct and procedures. You can refuse video recording but still join the rest of the study. If you provide permission, some videos may be shown publicly for education purposes, but your child's name will be kept private. The videos or images from them will not be shown or sold for financial profit.
- 5) **Stored information.** This study is connected to other studies coordinated by the Aga Khan University. If you agree to join this study, we will access information about your baby collected as part of the Aga Khan University demographic surveillance system and other Aga Khan University studies to which you have already allowed, or will allow, your baby to join.

We expect to enrol about 4160 children with severe pneumonia in this study.

### **Potential Harms, Discomforts, or Inconveniences:**

There are no harms or discomforts that could be caused to your baby by taking part in this study.

### **Potential Benefits to individual participants:**

Your baby will receive free treatment at the hospital if referral is accepted. The baby will also receive two follow up visits to check if he/she is recovering as expected on day 7 and 14 as part of the study. If you refuse to accept hospital referral for injectable antibiotics and oxygen, we will provide less ideal oral treatment options at home.

### **Potential Benefits to Society:**

We may learn more about the usefulness of pulse oximetry for assessment of young babies in your community and other similar places.

**Confidentiality:**

We will respect your privacy. No information about you or your child will be given to anyone or be published without your permission, unless required by law. The paper forms, videos and electronic information made in this study will be stored in a secure, locked location. Only members of the research team will have access to them. BMGF (the sponsor) or AKU Clinical Research Monitors may look at your child's records to check on the study. By signing this consent form, you agree to let these people look at your child's records. We will put a copy of this research consent form in your child's patient health record and give you a copy as well. After the study has been completed, the forms and videos will be kept as long as required by BMGF and AKU policies. They will then be destroyed according to these same policies. Paper and electronic forms from this study will be stored for at least 7 years after publication of the study. Published study results will not reveal your identity or the identity of your baby.

**Payment**

No payment will be given for participation in this study.

**Participation:**

You decide if your child joins this study. If you choose to let your child take part, you can take your child out of the study at any time.

In the unlikely situation that your child becomes ill or is harmed because of study participation, we will treat your child for free. Your signing this consent form does not interfere with your legal rights in any way. The staff of the study, any people who gave money for the study, or the hospital are still responsible, legally and professionally, for what they do during this study.

**Sponsorship:**

The funder of this research is the Bill and Melinda Gates Foundation Seattle, USA.

**Conflicts of interest:**

None of the researchers have any conflicts of interest to declare.

**Consent:**

By signing this form, you agree that:

- 1) The study has been explained to you.
- 2) All of your questions have been answered.
- 3) The possible harms and benefits of this study have been explained to you.
- 4) You may ask questions about the study now and in the future.
- 5) You have been told that your child's medical records will be kept private except as described to you.
- 6) You understand that information about your child will not be given to anyone or be published without first asking your permission.

I agree that my child \_\_\_\_\_ may take part in this study.

I understand that videos may be used to assess the success of pulse oximetry. I understand that I may refuse to permit video-recording of my child, yet take part in other aspects of the study. I understand that even if I permit video-recording now, I may refuse the use of these videos at a later time. I understand that I may permit video-recording of my child for researchers to view, but refuse any public display of the videos.

1  
2  
3  
4  
5 I agree to permit my child and me to be video-recorded during this study.  
6  
7

8  YES  NO  
9

10  
11 I agree to permit whole or parts of videos of my child and me to be shown publicly for educational purposes.  
12

13  YES  NO  
14  
15  
16

17 \_\_\_\_\_  
18  
19 Printed Name of Parent/Legal Guardian  
20 date

\_\_\_\_\_

Parent/Legal Guardian's signature/Thumb print &

21  
22  
23  
24  
25  
26 \_\_\_\_\_  
27 Printed Name of person who explained consent

\_\_\_\_\_

Signature of Person who explained consent & date

28  
29  
30  
31 \_\_\_\_\_  
32 Printed Witness' name

\_\_\_\_\_

Witness' signature & date

33  
34 (If the parent/legal guardian does not read Sindhi)  
35  
36  
37  
38

39  
40 If you have any questions about this study, please call Dr Fatima Mir at \_\_\_\_\_  
41  
42

43  
44 If you have questions about your child's rights as a subject in a study or injuries during a study, please call  
45 Coordinator, Bioethics Unit at \_\_\_\_\_  
46  
47  
48  
49  
50  
51  
52  
53  
54  
55  
56  
57  
58  
59  
60

Appendix 3: Study Activities

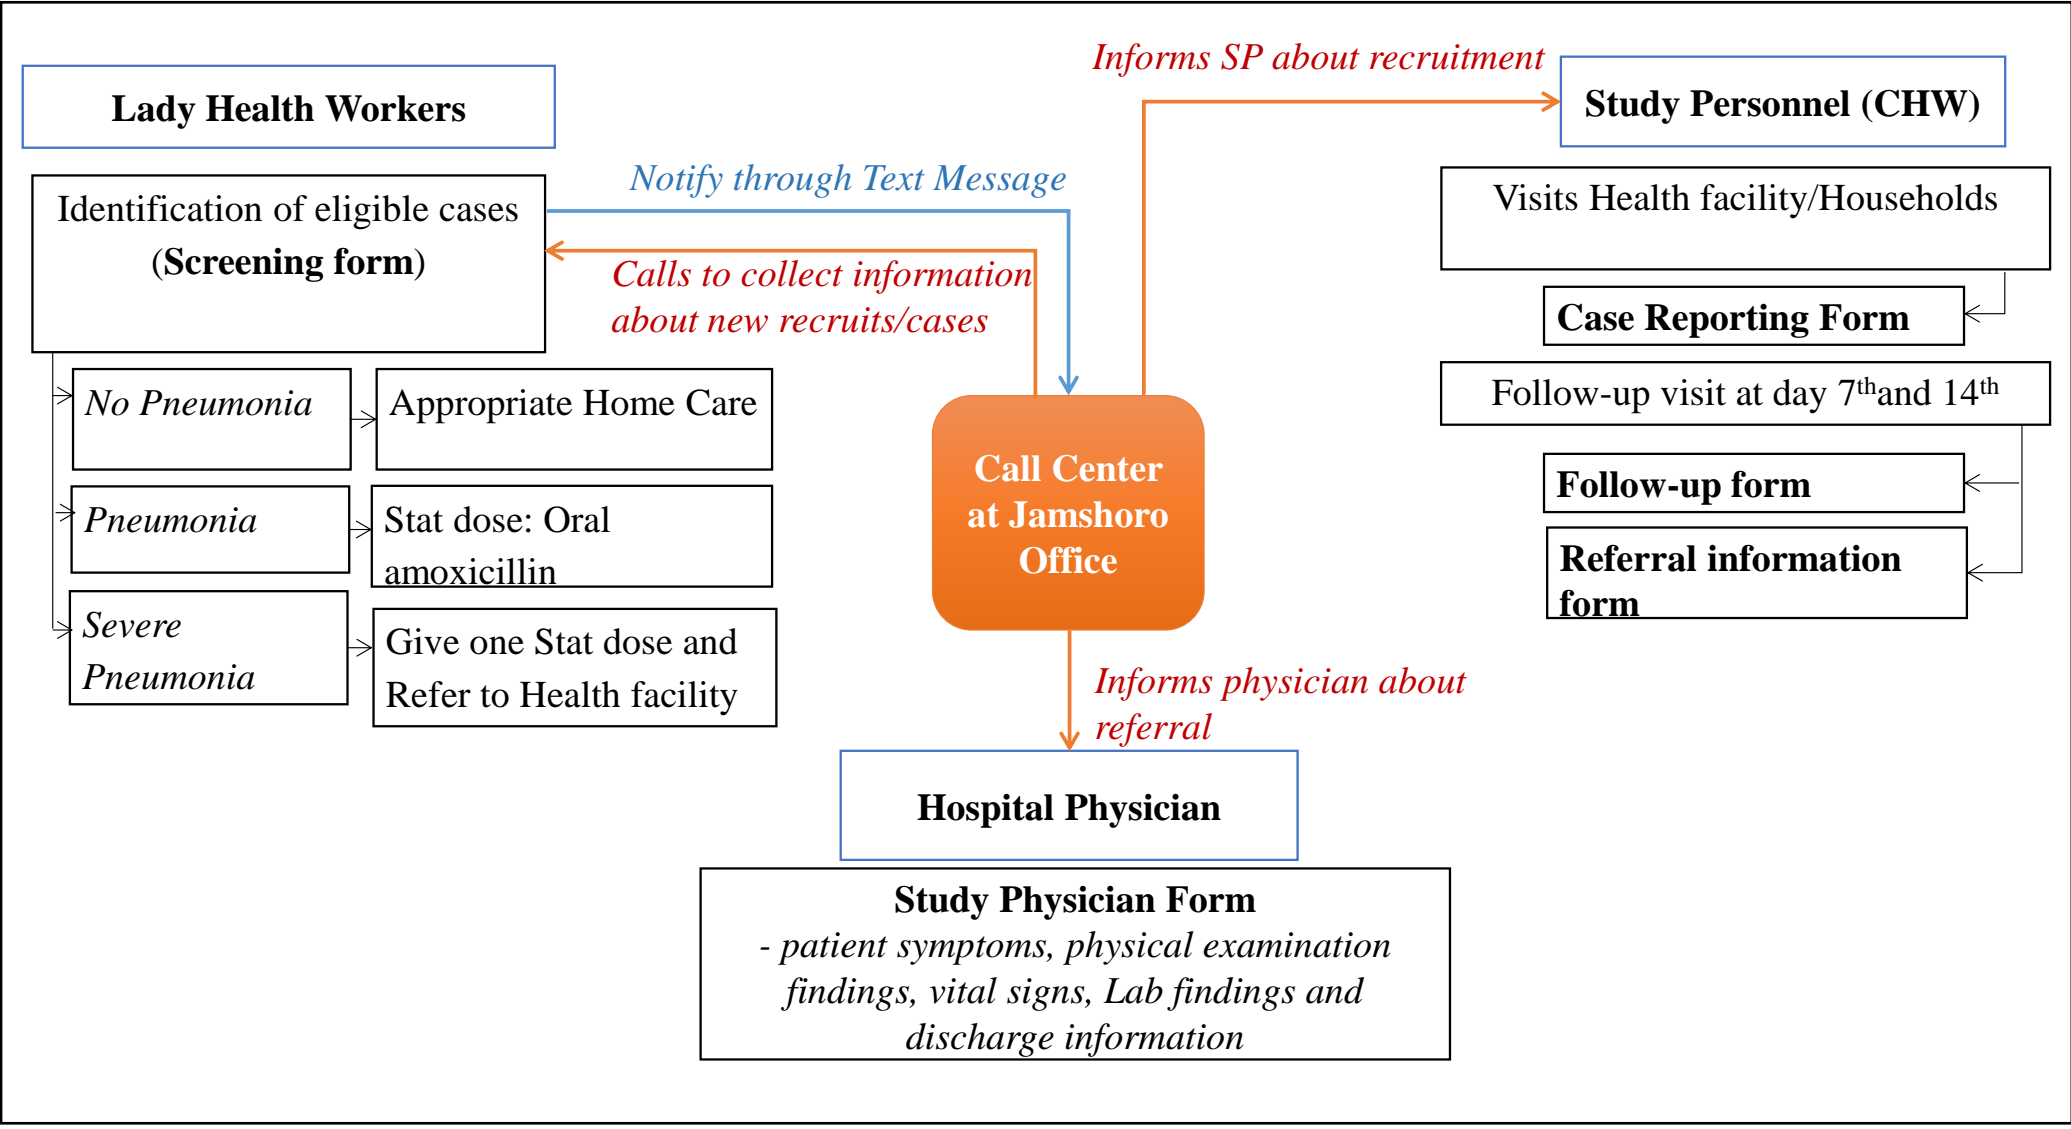

1  
2  
3  
4  
5  
6  
7  
8  
9  
10  
11  
12  
13  
14  
15  
16  
17  
18  
19  
20  
21  
22  
23  
24  
25  
26  
27  
28  
29  
30  
31  
32  
33  
34  
35  
36  
37  
38  
39  
40  
41  
42  
43  
44  
45  
46  
47  
48  
49  
50  
51  
52  
53  
54  
55  
56  
57  
58  
59  
60

For peer review only



STANDARD PROTOCOL ITEMS: RECOMMENDATIONS FOR INTERVENTIONAL TRIALS

SPIRIT 2013 Checklist: Recommended items to address in a clinical trial protocol and related documents\*

| Section/item                      | Item No | Description                                                                                                                                                                                                                                                                              | Page numbers:          |
|-----------------------------------|---------|------------------------------------------------------------------------------------------------------------------------------------------------------------------------------------------------------------------------------------------------------------------------------------------|------------------------|
| <b>Administrative information</b> |         |                                                                                                                                                                                                                                                                                          |                        |
| Title                             | 1       | Descriptive title identifying the study design, population, interventions, and, if applicable, trial acronym                                                                                                                                                                             | Title page             |
| Trial registration                | 2a      | Trial identifier and registry name. If not yet registered, name of intended registry                                                                                                                                                                                                     | Page 1                 |
|                                   | 2b      | All items from the World Health Organization Trial Registration Data Set                                                                                                                                                                                                                 | Page 1                 |
| Protocol version                  | 3       | Date and version identifier                                                                                                                                                                                                                                                              |                        |
| Funding                           | 4       | Sources and types of financial, material, and other support                                                                                                                                                                                                                              | Page 14                |
| Roles and responsibilities        | 5a      | Names, affiliations, and roles of protocol contributors                                                                                                                                                                                                                                  | Title page and page 14 |
|                                   | 5b      | Name and contact information for the trial sponsor                                                                                                                                                                                                                                       |                        |
|                                   | 5c      | Role of study sponsor and funders, if any, in study design; collection, management, analysis, and interpretation of data; writing of the report; and the decision to submit the report for publication, including whether they will have ultimate authority over any of these activities |                        |
|                                   | 5d      | Composition, roles, and responsibilities of the coordinating centre, steering committee, endpoint adjudication committee, data management team, and other individuals or groups overseeing the trial, if applicable (see Item 21a for data monitoring committee)                         |                        |

**Introduction**

|    |                                                           |     |                                                        |                |
|----|-----------------------------------------------------------|-----|--------------------------------------------------------|----------------|
| 1  |                                                           |     |                                                        |                |
| 2  | Background and                                            | 6a  | Description of research question and justification     | Pages 3 - 5    |
| 3  | rationale                                                 |     | for undertaking the trial, including summary of        |                |
| 4  |                                                           |     | relevant studies (published and unpublished)           |                |
| 5  |                                                           |     | examining benefits and harms for each                  |                |
| 6  |                                                           |     | intervention                                           |                |
| 7  |                                                           |     |                                                        |                |
| 8  |                                                           | 6b  | Explanation for choice of comparators                  | Page 4         |
| 9  |                                                           |     |                                                        |                |
| 10 | Objectives                                                | 7   | Specific objectives or hypotheses                      | Page 5         |
| 11 |                                                           |     |                                                        |                |
| 12 | Trial design                                              | 8   | Description of trial design including type of trial    | Page 5         |
| 13 |                                                           |     | (eg, parallel group, crossover, factorial, single      |                |
| 14 |                                                           |     | group), allocation ratio, and framework (eg,           |                |
| 15 |                                                           |     | superiority, equivalence, noninferiority,              |                |
| 16 |                                                           |     | exploratory)                                           |                |
| 17 |                                                           |     |                                                        |                |
| 18 |                                                           |     |                                                        |                |
| 19 |                                                           |     |                                                        |                |
| 20 | <b>Methods: Participants, interventions, and outcomes</b> |     |                                                        |                |
| 21 |                                                           |     |                                                        |                |
| 22 | Study setting                                             | 9   | Description of study settings (eg, community           | Page 6         |
| 23 |                                                           |     | clinic, academic hospital) and list of countries       |                |
| 24 |                                                           |     | where data will be collected. Reference to where       |                |
| 25 |                                                           |     | list of study sites can be obtained                    |                |
| 26 |                                                           |     |                                                        |                |
| 27 | Eligibility criteria                                      | 10  | Inclusion and exclusion criteria for participants. If  | Page 6         |
| 28 |                                                           |     | applicable, eligibility criteria for study centres and |                |
| 29 |                                                           |     | individuals who will perform the interventions (eg,    |                |
| 30 |                                                           |     | surgeons, psychotherapists)                            |                |
| 31 |                                                           |     |                                                        |                |
| 32 |                                                           |     |                                                        |                |
| 33 | Interventions                                             | 11a | Interventions for each group with sufficient detail    | Pages 7 - 9    |
| 34 |                                                           |     | to allow replication, including how and when they      |                |
| 35 |                                                           |     | will be administered                                   |                |
| 36 |                                                           |     |                                                        |                |
| 37 |                                                           | 11b | Criteria for discontinuing or modifying allocated      | Not applicable |
| 38 |                                                           |     | interventions for a given trial participant (eg, drug  |                |
| 39 |                                                           |     | dose change in response to harms, participant          |                |
| 40 |                                                           |     | request, or improving/worsening disease)               |                |
| 41 |                                                           |     |                                                        |                |
| 42 |                                                           |     |                                                        |                |
| 43 |                                                           | 11c | Strategies to improve adherence to intervention        | Not applicable |
| 44 |                                                           |     | protocols, and any procedures for monitoring           |                |
| 45 |                                                           |     | adherence (eg, drug tablet return, laboratory          |                |
| 46 |                                                           |     | tests)                                                 |                |
| 47 |                                                           |     |                                                        |                |
| 48 |                                                           |     |                                                        |                |
| 49 |                                                           | 11d | Relevant concomitant care and interventions that       |                |
| 50 |                                                           |     | are permitted or prohibited during the trial           |                |
| 51 |                                                           |     |                                                        |                |
| 52 |                                                           |     |                                                        |                |
| 53 |                                                           |     |                                                        |                |
| 54 |                                                           |     |                                                        |                |
| 55 |                                                           |     |                                                        |                |
| 56 |                                                           |     |                                                        |                |
| 57 |                                                           |     |                                                        |                |
| 58 |                                                           |     |                                                        |                |
| 59 |                                                           |     |                                                        |                |
| 60 |                                                           |     |                                                        |                |



|    |                      |    |                                                                                                                                                                                                                                                                                                                                                                                |             |
|----|----------------------|----|--------------------------------------------------------------------------------------------------------------------------------------------------------------------------------------------------------------------------------------------------------------------------------------------------------------------------------------------------------------------------------|-------------|
| 1  |                      |    |                                                                                                                                                                                                                                                                                                                                                                                |             |
| 2  | Outcomes             | 12 | Primary, secondary, and other outcomes, including the specific measurement variable (eg, systolic blood pressure), analysis metric (eg, change from baseline, final value, time to event), method of aggregation (eg, median, proportion), and time point for each outcome. Explanation of the clinical relevance of chosen efficacy and harm outcomes is strongly recommended | Pages 5-6   |
| 3  |                      |    |                                                                                                                                                                                                                                                                                                                                                                                |             |
| 4  |                      |    |                                                                                                                                                                                                                                                                                                                                                                                |             |
| 5  |                      |    |                                                                                                                                                                                                                                                                                                                                                                                |             |
| 6  |                      |    |                                                                                                                                                                                                                                                                                                                                                                                |             |
| 7  |                      |    |                                                                                                                                                                                                                                                                                                                                                                                |             |
| 8  |                      |    |                                                                                                                                                                                                                                                                                                                                                                                |             |
| 9  |                      |    |                                                                                                                                                                                                                                                                                                                                                                                |             |
| 10 |                      |    |                                                                                                                                                                                                                                                                                                                                                                                |             |
| 11 |                      |    |                                                                                                                                                                                                                                                                                                                                                                                |             |
| 12 | Participant timeline | 13 | Time schedule of enrolment, interventions (including any run-ins and washouts), assessments, and visits for participants. A schematic diagram is highly recommended (see Figure)                                                                                                                                                                                               | Page 6      |
| 13 |                      |    |                                                                                                                                                                                                                                                                                                                                                                                |             |
| 14 |                      |    |                                                                                                                                                                                                                                                                                                                                                                                |             |
| 15 |                      |    |                                                                                                                                                                                                                                                                                                                                                                                |             |
| 16 |                      |    |                                                                                                                                                                                                                                                                                                                                                                                |             |
| 17 |                      |    |                                                                                                                                                                                                                                                                                                                                                                                |             |
| 18 |                      |    |                                                                                                                                                                                                                                                                                                                                                                                |             |
| 19 | Sample size          | 14 | Estimated number of participants needed to achieve study objectives and how it was determined, including clinical and statistical assumptions supporting any sample size calculations                                                                                                                                                                                          | Page 12     |
| 20 |                      |    |                                                                                                                                                                                                                                                                                                                                                                                |             |
| 21 |                      |    |                                                                                                                                                                                                                                                                                                                                                                                |             |
| 22 |                      |    |                                                                                                                                                                                                                                                                                                                                                                                |             |
| 23 |                      |    |                                                                                                                                                                                                                                                                                                                                                                                |             |
| 24 |                      |    |                                                                                                                                                                                                                                                                                                                                                                                |             |
| 25 |                      |    |                                                                                                                                                                                                                                                                                                                                                                                |             |
| 26 | Recruitment          | 15 | Strategies for achieving adequate participant enrolment to reach target sample size                                                                                                                                                                                                                                                                                            | Pages 7 - 9 |
| 27 |                      |    |                                                                                                                                                                                                                                                                                                                                                                                |             |
| 28 |                      |    |                                                                                                                                                                                                                                                                                                                                                                                |             |

### Methods: Assignment of interventions (for controlled trials)

#### Allocation:

|    |                                  |     |                                                                                                                                                                                                                                                                                                                                                          |             |
|----|----------------------------------|-----|----------------------------------------------------------------------------------------------------------------------------------------------------------------------------------------------------------------------------------------------------------------------------------------------------------------------------------------------------------|-------------|
| 31 |                                  |     |                                                                                                                                                                                                                                                                                                                                                          |             |
| 32 |                                  |     |                                                                                                                                                                                                                                                                                                                                                          |             |
| 33 | Sequence generation              | 16a | Method of generating the allocation sequence (eg, computer-generated random numbers), and list of any factors for stratification. To reduce predictability of a random sequence, details of any planned restriction (eg, blocking) should be provided in a separate document that is unavailable to those who enrol participants or assign interventions | Pages 6 - 7 |
| 34 |                                  |     |                                                                                                                                                                                                                                                                                                                                                          |             |
| 35 |                                  |     |                                                                                                                                                                                                                                                                                                                                                          |             |
| 36 |                                  |     |                                                                                                                                                                                                                                                                                                                                                          |             |
| 37 |                                  |     |                                                                                                                                                                                                                                                                                                                                                          |             |
| 38 |                                  |     |                                                                                                                                                                                                                                                                                                                                                          |             |
| 39 |                                  |     |                                                                                                                                                                                                                                                                                                                                                          |             |
| 40 |                                  |     |                                                                                                                                                                                                                                                                                                                                                          |             |
| 41 |                                  |     |                                                                                                                                                                                                                                                                                                                                                          |             |
| 42 |                                  |     |                                                                                                                                                                                                                                                                                                                                                          |             |
| 43 |                                  |     |                                                                                                                                                                                                                                                                                                                                                          |             |
| 44 | Allocation concealment mechanism | 16b | Mechanism of implementing the allocation sequence (eg, central telephone; sequentially numbered, opaque, sealed envelopes), describing any steps to conceal the sequence until interventions are assigned                                                                                                                                                | Pages 6 - 7 |
| 45 |                                  |     |                                                                                                                                                                                                                                                                                                                                                          |             |
| 46 |                                  |     |                                                                                                                                                                                                                                                                                                                                                          |             |
| 47 |                                  |     |                                                                                                                                                                                                                                                                                                                                                          |             |
| 48 |                                  |     |                                                                                                                                                                                                                                                                                                                                                          |             |
| 49 |                                  |     |                                                                                                                                                                                                                                                                                                                                                          |             |
| 50 |                                  |     |                                                                                                                                                                                                                                                                                                                                                          |             |
| 51 | Implementation                   | 16c | Who will generate the allocation sequence, who will enrol participants, and who will assign participants to interventions                                                                                                                                                                                                                                | Pages 6 - 8 |
| 52 |                                  |     |                                                                                                                                                                                                                                                                                                                                                          |             |
| 53 |                                  |     |                                                                                                                                                                                                                                                                                                                                                          |             |
| 54 |                                  |     |                                                                                                                                                                                                                                                                                                                                                          |             |
| 55 |                                  |     |                                                                                                                                                                                                                                                                                                                                                          |             |
| 56 | Blinding (masking)               | 17a | Who will be blinded after assignment to interventions (eg, trial participants, care providers, outcome assessors, data analysts), and how                                                                                                                                                                                                                |             |
| 57 |                                  |     |                                                                                                                                                                                                                                                                                                                                                          |             |
| 58 |                                  |     |                                                                                                                                                                                                                                                                                                                                                          |             |
| 59 |                                  |     |                                                                                                                                                                                                                                                                                                                                                          |             |
| 60 |                                  |     |                                                                                                                                                                                                                                                                                                                                                          |             |

- 1  
2  
3  
4  
5  
6  
7
- 17b If blinded, circumstances under which unblinding is permissible, and procedure for revealing a participant's allocated intervention during the trial

8  
9  
10  
11  
12  
13  
14  
15  
16  
17  
18  
19

**Methods: Data collection, management, and analysis**

- 20  
21  
22  
23  
24  
25  
26  
27  
28  
29  
30  
31  
32  
33  
34  
35  
36  
37  
38  
39  
40  
41  
42  
43  
44  
45  
46  
47  
48
- Data collection methods 18a Plans for assessment and collection of outcome, baseline, and other trial data, including any related processes to promote data quality (eg, duplicate measurements, training of assessors) and a description of study instruments (eg, questionnaires, laboratory tests) along with their reliability and validity, if known. Reference to where data collection forms can be found, if not in the protocol Page 9
- 18b Plans to promote participant retention and complete follow-up, including list of any outcome data to be collected for participants who discontinue or deviate from intervention protocols Page 12
- Data management 19 Plans for data entry, coding, security, and storage, including any related processes to promote data quality (eg, double data entry; range checks for data values). Reference to where details of data management procedures can be found, if not in the protocol Page 10
- Statistical methods 20a Statistical methods for analysing primary and secondary outcomes. Reference to where other details of the statistical analysis plan can be found, if not in the protocol Page 12
- 20b Methods for any additional analyses (eg, subgroup and adjusted analyses) Page 12
- 20c Definition of analysis population relating to protocol non-adherence (eg, as randomised analysis), and any statistical methods to handle missing data (eg, multiple imputation)

49  
50  
51  
52  
53  
54  
55  
56  
57  
58  
59  
60

**Methods: Monitoring**

- Data monitoring 21a Composition of data monitoring committee (DMC); summary of its role and reporting structure; statement of whether it is independent from the sponsor and competing interests; and reference to where further details about its charter can be found, if not in the protocol. Alternatively, an explanation of why a DMC is not needed Page 10

|    |                                 |     |                                                        |
|----|---------------------------------|-----|--------------------------------------------------------|
| 1  |                                 |     |                                                        |
| 2  |                                 | 21b | Description of any interim analyses and stopping       |
| 3  |                                 |     | guidelines, including who will have access to          |
| 4  |                                 |     | these interim results and make the final decision      |
| 5  |                                 |     | to terminate the trial                                 |
| 6  |                                 |     |                                                        |
| 7  | Harms                           | 22  | Plans for collecting, assessing, reporting, and        |
| 8  |                                 |     | managing solicited and spontaneously reported          |
| 9  |                                 |     | adverse events and other unintended effects of         |
| 10 |                                 |     | trial interventions or trial conduct                   |
| 11 |                                 |     |                                                        |
| 12 |                                 |     |                                                        |
| 13 | Auditing                        | 23  | Frequency and procedures for auditing trial            |
| 14 |                                 |     | conduct, if any, and whether the process will be       |
| 15 |                                 |     | independent from investigators and the sponsor         |
| 16 |                                 |     |                                                        |
| 17 |                                 |     |                                                        |
| 18 | <b>Ethics and dissemination</b> |     |                                                        |
| 19 |                                 |     |                                                        |
| 20 | Research ethics                 | 24  | Plans for seeking research ethics                      |
| 21 | approval                        |     | committee/institutional review board (REC/IRB)         |
| 22 |                                 |     | approval                                               |
| 23 |                                 |     |                                                        |
| 24 | Protocol                        | 25  | Plans for communicating important protocol             |
| 25 | amendments                      |     | modifications (eg, changes to eligibility criteria,    |
| 26 |                                 |     | outcomes, analyses) to relevant parties (eg,           |
| 27 |                                 |     | investigators, REC/IRBs, trial participants, trial     |
| 28 |                                 |     | registries, journals, regulators)                      |
| 29 |                                 |     |                                                        |
| 30 |                                 |     |                                                        |
| 31 | Consent or assent               | 26a | Who will obtain informed consent or assent from        |
| 32 |                                 |     | potential trial participants or authorised             |
| 33 |                                 |     | surrogates, and how (see Item 32)                      |
| 34 |                                 |     |                                                        |
| 35 |                                 |     |                                                        |
| 36 |                                 | 26b | Additional consent provisions for collection and       |
| 37 |                                 |     | use of participant data and biological specimens       |
| 38 |                                 |     | in ancillary studies, if applicable                    |
| 39 |                                 |     |                                                        |
| 40 | Confidentiality                 | 27  | How personal information about potential and           |
| 41 |                                 |     | enrolled participants will be collected, shared, and   |
| 42 |                                 |     | maintained in order to protect confidentiality         |
| 43 |                                 |     | before, during, and after the trial                    |
| 44 |                                 |     |                                                        |
| 45 |                                 |     |                                                        |
| 46 | Declaration of                  | 28  | Financial and other competing interests for            |
| 47 | interests                       |     | principal investigators for the overall trial and      |
| 48 |                                 |     | each study site                                        |
| 49 |                                 |     |                                                        |
| 50 | Access to data                  | 29  | Statement of who will have access to the final trial   |
| 51 |                                 |     | dataset, and disclosure of contractual agreements      |
| 52 |                                 |     | that limit such access for investigators               |
| 53 |                                 |     |                                                        |
| 54 |                                 |     |                                                        |
| 55 | Ancillary and                   | 30  | Provisions, if any, for ancillary and post-trial care, |
| 56 | post-trial care                 |     | and for compensation to those who suffer harm          |
| 57 |                                 |     | from trial participation                               |
| 58 |                                 |     |                                                        |
| 59 |                                 |     |                                                        |
| 60 |                                 |     |                                                        |

|    |                   |     |                                                       |
|----|-------------------|-----|-------------------------------------------------------|
| 1  |                   |     |                                                       |
| 2  | Dissemination     | 31a | Plans for investigators and sponsor to                |
| 3  | policy            |     | communicate trial results to participants,            |
| 4  |                   |     | healthcare professionals, the public, and other       |
| 5  |                   |     | relevant groups (eg, via publication, reporting in    |
| 6  |                   |     | results databases, or other data sharing              |
| 7  |                   |     | arrangements), including any publication              |
| 8  |                   |     | restrictions                                          |
| 9  |                   |     |                                                       |
| 10 |                   |     |                                                       |
| 11 |                   | 31b | Authorship eligibility guidelines and any intended    |
| 12 |                   |     | use of professional writers                           |
| 13 |                   |     |                                                       |
| 14 |                   | 31c | Plans, if any, for granting public access to the full |
| 15 |                   |     | protocol, participant-level dataset, and statistical  |
| 16 |                   |     | code                                                  |
| 17 |                   |     |                                                       |
| 18 |                   |     |                                                       |
| 19 | <b>Appendices</b> |     |                                                       |
| 20 |                   |     |                                                       |
| 21 | Informed consent  | 32  | Model consent form and other related                  |
| 22 | materials         |     | documentation given to participants and               |
| 23 |                   |     | authorised surrogates                                 |
| 24 |                   |     |                                                       |
| 25 | Biological        | 33  | Plans for collection, laboratory evaluation, and      |
| 26 | specimens         |     | storage of biological specimens for genetic or        |
| 27 |                   |     | molecular analysis in the current trial and for       |
| 28 |                   |     | future use in ancillary studies, if applicable        |
| 29 |                   |     |                                                       |
| 30 |                   |     |                                                       |

---

\*It is strongly recommended that this checklist be read in conjunction with the SPIRIT 2013 Explanation & Elaboration for important clarification on the items. Amendments to the protocol should be tracked and dated. The SPIRIT checklist is copyrighted by the SPIRIT Group under the Creative Commons "[Attribution-NonCommercial-NoDerivs 3.0 Unported](https://creativecommons.org/licenses/by-nc-nd/3.0/)" license.
